# Supplementary material for: Connecting genetics and gene expression data for target prioritisation and drug repositioning
Source: BioData Min. 2018 May 31;11:7. doi: 10.1186/s13040-018-0171-y (PMC5984374; doi:10.1186/s13040-018-0171-y)
Supplement: Supplementary file 3 — Table S3. Drug repositioning hypotheses based on the significance of the overlap between genes genetically associated with the disease and genes differentially expressed after drug treatment. Results are filtered for adjusted p-value <1e-10. (CSV 1089 kb) [file 13040_2018_171_MOESM3_ESM.csv]

chembl.id	chembl.name	efo.id	efo.term	set1	set2	overlap	universe	odds.ratio	p.value	existing.indication	p.adjusted
CHEMBL98	VORINOSTAT	EFO_0001073	obesity	4984	7209	1660	64102	4.82092626993059	1.1125369292536e-308	FALSE	1.11253692925622e-308
CHEMBL1421	DASATINIB	EFO_0001073	obesity	4246	7209	1408	64102	4.62287334641017	1.1125369292536e-308	FALSE	1.11253692925622e-308
CHEMBL507361	PD-0325901	EFO_0001073	obesity	4217	7209	1398	64102	4.61464910109847	1.1125369292536e-308	FALSE	1.11253692925622e-308
CHEMBL98	VORINOSTAT	EFO_0003758	autism	4984	5501	1339	64102	4.85040888434227	1.1125369292536e-308	FALSE	1.11253692925622e-308
CHEMBL98	VORINOSTAT	EFO_0001359	type I diabetes mellitus	4984	5458	1329	64102	4.84229020810083	1.1125369292536e-308	FALSE	1.11253692925622e-308
CHEMBL98	VORINOSTAT	EFO_0000289	bipolar disorder	4984	5835	1378	64102	4.68642809897925	1.1125369292536e-308	FALSE	1.11253692925622e-308
CHEMBL98	VORINOSTAT	EFO_0000537	hypertension	4984	6014	1392	64102	4.56901728159699	1.1125369292536e-308	FALSE	1.11253692925622e-308
CHEMBL428690	ALVOCIDIB	EFO_0001073	obesity	4118	7209	1333	64102	4.40737530450033	1.11253836735691e-308	FALSE	1.12587623622109e-308
CHEMBL98	VORINOSTAT	HP_0003124	hypercholesterolemia	4984	4983	1201	64102	4.64489367459362	2.06698098607203e-308	FALSE	1.57387824969358e-304
CHEMBL507361	PD-0325901	EFO_0003758	autism	4217	5501	1141	64102	4.72372008228162	2.60287828709732e-299	FALSE	1.93146583294057e-295
CHEMBL428690	ALVOCIDIB	EFO_0000289	bipolar disorder	4118	5835	1160	64102	4.63936197985264	2.44475286882743e-297	FALSE	1.64920806028491e-293
CHEMBL445813	AT-7519	EFO_0001073	obesity	3979	7209	1279	64102	4.32906608204648	6.02055104273095e-297	FALSE	3.72295825104875e-293
CHEMBL98	VORINOSTAT	EFO_0000692	schizophrenia	4984	5048	1190	64102	4.49244206227741	2.27918045864101e-295	FALSE	1.30097373794966e-291
CHEMBL98	VORINOSTAT	EFO_0003885	multiple sclerosis	4984	4889	1168	64102	4.55663787672345	4.65899934474062e-295	FALSE	2.46943604554627e-291
CHEMBL1421	DASATINIB	EFO_0003758	autism	4246	5501	1130	64102	4.60319842469235	5.70128244027832e-289	FALSE	2.82042442320568e-285
CHEMBL1421	DASATINIB	EFO_0000289	bipolar disorder	4246	5835	1167	64102	4.48086553561432	2.45830468619257e-288	FALSE	1.14011562024325e-284
CHEMBL1421	DASATINIB	EFO_0001359	type I diabetes mellitus	4246	5458	1124	64102	4.61204285644569	2.87389752798163e-288	FALSE	1.25445627096398e-284
CHEMBL507361	PD-0325901	EFO_0001359	type I diabetes mellitus	4217	5458	1118	64102	4.61699225900584	3.27339690659291e-287	FALSE	1.34945787474293e-283
CHEMBL1421	DASATINIB	EFO_0000537	hypertension	4246	6014	1183	64102	4.39896555988753	1.00603674208214e-285	FALSE	3.92910297085291e-282
CHEMBL428690	ALVOCIDIB	EFO_0000537	hypertension	4118	6014	1154	64102	4.41592406190263	1.44241201809923e-280	FALSE	5.35170919015265e-277
CHEMBL507361	PD-0325901	EFO_0000537	hypertension	4217	6014	1170	64102	4.36301384834269	2.01293222432004e-280	FALSE	7.11283979550802e-277
CHEMBL445813	AT-7519	EFO_0000289	bipolar disorder	3979	5835	1110	64102	4.53597620587709	3.45305495585655e-279	FALSE	1.16469974090607e-275
CHEMBL1879463	DACTOLISIB	EFO_0001073	obesity	3807	7209	1217	64102	4.25839195369212	8.76776248965912e-279	FALSE	2.82874702410937e-275
CHEMBL1879463	DACTOLISIB	EFO_0003758	autism	3807	5501	1044	64102	4.73357764345229	6.69752283497478e-277	FALSE	2.07079034153876e-273
CHEMBL507361	PD-0325901	EFO_0000289	bipolar disorder	4217	5835	1143	64102	4.3737926659602	8.19891230969657e-276	FALSE	2.43360115176414e-272
CHEMBL445813	AT-7519	EFO_0003758	autism	3979	5501	1069	64102	4.61587273954768	1.01413665053572e-275	FALSE	2.89438500588473e-272
CHEMBL428690	ALVOCIDIB	EFO_0001359	type I diabetes mellitus	4118	5458	1085	64102	4.54907568273622	2.44149757632578e-275	FALSE	6.71004917226869e-272
CHEMBL428690	ALVOCIDIB	EFO_0003758	autism	4118	5501	1089	64102	4.52828952124126	7.89897267646436e-275	FALSE	2.09336881234656e-271
CHEMBL445813	AT-7519	EFO_0001359	type I diabetes mellitus	3979	5458	1061	64102	4.60803056387368	1.71697610754296e-273	FALSE	4.3933866227664e-270
CHEMBL507361	PD-0325901	HP_0003124	hypercholesterolemia	4217	4983	1041	64102	4.65138214181826	1.96201552083471e-272	FALSE	4.85304539078465e-269
CHEMBL1879463	DACTOLISIB	EFO_0000537	hypertension	3807	6014	1087	64102	4.49081230964406	1.53427532216121e-270	FALSE	3.67260968648299e-267
CHEMBL1287853	FEDRATINIB	EFO_0001073	obesity	3684	7209	1173	64102	4.20884633366165	4.0391214554226e-266	FALSE	9.36634398748856e-263
CHEMBL1421	DASATINIB	HP_0003124	hypercholesterolemia	4246	4983	1030	64102	4.52911392474864	1.78699570047782e-262	FALSE	4.01830351375626e-259
CHEMBL1287853	FEDRATINIB	EFO_0000537	hypertension	3684	6014	1050	64102	4.45311468393015	7.71889662909692e-260	FALSE	1.6846491893004e-256
CHEMBL98	VORINOSTAT	EFO_0004211	Hypertriglyceridemia	4984	3627	937	64102	4.85690758436121	6.52415982925603e-259	FALSE	1.38321508608555e-255
CHEMBL98	VORINOSTAT	EFO_0003761	unipolar depression	4984	4304	1032	64102	4.45683209846603	1.79548999332006e-258	FALSE	3.70095374873098e-255
CHEMBL1879463	DACTOLISIB	EFO_0000289	bipolar disorder	3807	5835	1050	64102	4.41805442193647	3.05823866487446e-258	FALSE	6.13342162505431e-255
CHEMBL1287853	FEDRATINIB	EFO_0003758	autism	3684	5501	994	64102	4.5838271979673	2.57776692178353e-256	FALSE	5.0337682744986e-253
CHEMBL223360	LINIFANIB	EFO_0001073	obesity	3168	7209	1055	64102	4.44441260893361	1.30141289120688e-255	FALSE	2.47618829723094e-252
CHEMBL445813	AT-7519	EFO_0000537	hypertension	3979	6014	1091	64102	4.23578174542169	5.92862744070949e-255	FALSE	1.09983449809462e-251
CHEMBL1614701	SELUMETINIB	EFO_0001073	obesity	3317	7209	1082	64102	4.31874330263761	6.03733337733008e-254	FALSE	1.09268371527995e-250
CHEMBL445813	AT-7519	EFO_0003885	multiple sclerosis	3979	4889	967	64102	4.60034977763327	2.55471170621357e-252	FALSE	4.51362814665662e-249
CHEMBL1287853	FEDRATINIB	EFO_0001359	type I diabetes mellitus	3684	5458	980	64102	4.52733917584197	6.38134626018726e-250	FALSE	1.1012274400865e-246
CHEMBL1421	DASATINIB	EFO_0003885	multiple sclerosis	4246	4889	999	64102	4.4263207831791	2.19940472272781e-249	FALSE	3.70924607840949e-246
CHEMBL507361	PD-0325901	EFO_0003885	multiple sclerosis	4217	4889	994	64102	4.43316607076047	1.09572046876074e-248	FALSE	1.80684305298645e-245
CHEMBL98	VORINOSTAT	EFO_0000378	coronary artery disease	4984	3553	911	64102	4.7809787237363	1.76287593099134e-248	FALSE	2.84378714041767e-245
CHEMBL1879463	DACTOLISIB	EFO_0001359	type I diabetes mellitus	3807	5458	995	64102	4.42640795054461	1.90063104183334e-247	FALSE	3.00077290338814e-244
CHEMBL1287853	FEDRATINIB	EFO_0000289	bipolar disorder	3684	5835	1012	64102	4.36569864145347	1.40328457215106e-246	FALSE	2.16939024325978e-243
CHEMBL428690	ALVOCIDIB	EFO_0003885	multiple sclerosis	4118	4889	975	64102	4.44380258320424	4.4649219181403e-245	FALSE	6.76162308031838e-242
CHEMBL180022	NERATINIB	EFO_0001073	obesity	3106	7209	1024	64102	4.35860989866192	1.28144278109639e-243	FALSE	1.90178923142515e-240
CHEMBL428690	ALVOCIDIB	HP_0003124	hypercholesterolemia	4118	4983	983	64102	4.38839843939269	1.94516587515485e-243	FALSE	2.8302163483503e-240
CHEMBL223360	LINIFANIB	EFO_0000289	bipolar disorder	3168	5835	918	64102	4.64798317310717	1.2205966227314e-240	FALSE	1.74181485364968e-237
CHEMBL27759	ENTINOSTAT	EFO_0001073	obesity	2971	7209	992	64102	4.42757885110543	2.10653147529978e-240	FALSE	2.94934279480415e-237
CHEMBL1614701	SELUMETINIB	EFO_0000289	bipolar disorder	3317	5835	941	64102	4.52280944705399	1.98478510742632e-239	FALSE	2.72742553512167e-236
CHEMBL27759	ENTINOSTAT	EFO_0000537	hypertension	2971	6014	895	64102	4.71710959371091	7.22885032837851e-238	FALSE	9.75303342940595e-235
CHEMBL1614701	SELUMETINIB	EFO_0003758	autism	3317	5501	908	64102	4.6111719905087	1.98351599204675e-237	FALSE	2.62833578910409e-234
CHEMBL1421	DASATINIB	EFO_0000692	schizophrenia	4246	5048	998	64102	4.23380815016777	3.76978920571041e-237	FALSE	4.90767031596037e-234
CHEMBL408513	BELINOSTAT	EFO_0001073	obesity	3180	7209	1027	64102	4.22385918297858	2.93499513751504e-236	FALSE	3.75502265826385e-233
CHEMBL507361	PD-0325901	EFO_0000692	schizophrenia	4217	5048	992	64102	4.23384248819652	6.99052758750671e-236	FALSE	8.79206948527009e-233
CHEMBL180022	NERATINIB	EFO_0000289	bipolar disorder	3106	5835	900	64102	4.63442362172467	1.39801072183676e-235	FALSE	1.72898976023161e-232
CHEMBL1879463	DACTOLISIB	HP_0003124	hypercholesterolemia	3807	4983	925	64102	4.44777732345471	7.4861771173972e-234	FALSE	9.10675037699113e-231
CHEMBL1614701	SELUMETINIB	EFO_0001359	type I diabetes mellitus	3317	5458	897	64102	4.56902516711525	1.01115476438953e-232	FALSE	1.21020547244395e-229
CHEMBL408513	BELINOSTAT	EFO_0000537	hypertension	3180	6014	923	64102	4.48468292977635	1.53698881918037e-232	FALSE	1.81035325916316e-229
CHEMBL521851	PICTILISIB	EFO_0001073	obesity	3076	7209	997	64102	4.23163287490098	2.76905928610801e-230	FALSE	3.2105944425882e-227
CHEMBL272980	MOCETINOSTAT	EFO_0001073	obesity	2992	7209	980	64102	4.29147157701516	4.82153090545019e-230	FALSE	5.50433385906049e-227
CHEMBL1879463	DACTOLISIB	EFO_0003885	multiple sclerosis	3807	4889	909	64102	4.43804385605674	7.83982955432758e-230	FALSE	8.81446291028603e-227
CHEMBL180022	NERATINIB	EFO_0000537	hypertension	3106	6014	906	64102	4.50569728108569	1.10536409558952e-229	FALSE	1.22423198079434e-226
CHEMBL445813	AT-7519	HP_0003124	hypercholesterolemia	3979	4983	939	64102	4.28321960776777	1.43780148631343e-227	FALSE	1.56900087193953e-224
CHEMBL223360	LINIFANIB	EFO_0001359	type I diabetes mellitus	3168	5458	864	64102	4.59876822278708	2.44304532518975e-226	FALSE	2.62733591819863e-223
CHEMBL1614701	SELUMETINIB	EFO_0000537	hypertension	3317	6014	935	64102	4.30516048723687	2.11984749493771e-225	FALSE	2.24718976231218e-222
CHEMBL98	VORINOSTAT	EFO_0000249	Alzheimers disease	4984	3757	905	64102	4.37701657906096	2.19485627458807e-225	FALSE	2.29393394163109e-222
CHEMBL223360	LINIFANIB	EFO_0000537	hypertension	3168	6014	909	64102	4.40051940544142	8.67968608385749e-225	FALSE	8.94550147017563e-222
CHEMBL1079175	MK-2206	EFO_0001073	obesity	2937	7209	960	64102	4.26735610326482	2.62932087148324e-224	FALSE	2.67272267490978e-221
CHEMBL507361	PD-0325901	EFO_0004211	Hypertriglyceridemia	4217	3627	804	64102	4.76128107808281	2.69055814032184e-222	FALSE	2.69801171354841e-219
CHEMBL98	VORINOSTAT	EFO_0000685	rheumatoid arthritis	4984	3417	852	64102	4.54601981167369	4.29356496226194e-222	FALSE	4.24805317366196e-219
CHEMBL1879463	DACTOLISIB	EFO_0000692	schizophrenia	3807	5048	913	64102	4.28463317330441	7.23380716879139e-222	FALSE	7.06295606526533e-219
CHEMBL507361	PD-0325901	EFO_0003761	unipolar depression	4217	4304	884	64102	4.37879381943083	1.66103999902461e-221	FALSE	1.60074640425482e-218
CHEMBL521851	PICTILISIB	EFO_0001359	type I diabetes mellitus	3076	5458	842	64102	4.60578406646786	2.31336789964512e-221	FALSE	2.20081365375854e-218
CHEMBL1229517	VEMURAFENIB	EFO_0001073	obesity	2910	7209	949	64102	4.24665406621433	9.38285623605134e-221	FALSE	8.81335249362266e-218
CHEMBL180022	NERATINIB	EFO_0003758	autism	3106	5501	849	64102	4.55585085596402	1.86975200580724e-220	FALSE	1.73431184488658e-217
CHEMBL1287853	FEDRATINIB	EFO_0003885	multiple sclerosis	3684	4889	876	64102	4.38471897744749	1.96627410459139e-219	FALSE	1.80132555470622e-216
CHEMBL325041	BORTEZOMIB	EFO_0001073	obesity	2931	7209	951	64102	4.21467233765525	2.10808230471285e-219	FALSE	1.90768594416118e-216
CHEMBL408513	BELINOSTAT	EFO_0001359	type I diabetes mellitus	3180	5458	855	64102	4.49928513408115	3.54280839096801e-219	FALSE	3.16739875484074e-216
CHEMBL1287853	FEDRATINIB	HP_0003124	hypercholesterolemia	3684	4983	885	64102	4.34529052728325	3.73716598429027e-219	FALSE	3.30138573647928e-216
CHEMBL445813	AT-7519	EFO_0000692	schizophrenia	3979	5048	932	64102	4.16202749227188	7.50403148995001e-219	FALSE	6.55101949072636e-216
CHEMBL272980	MOCETINOSTAT	EFO_0000537	hypertension	2992	6014	869	64102	4.45237430887169	2.86597060192281e-218	FALSE	2.47289940134514e-215
CHEMBL1421	DASATINIB	EFO_0003761	unipolar depression	4246	4304	880	64102	4.30869533667528	9.47784886050855e-217	FALSE	8.08395143326479e-214
CHEMBL223360	LINIFANIB	EFO_0003758	autism	3168	5501	853	64102	4.46190033761097	1.09982110135948e-216	FALSE	9.27411645754318e-214
CHEMBL428690	ALVOCIDIB	EFO_0000692	schizophrenia	4118	5048	947	64102	4.06951632916286	2.09643810378815e-216	FALSE	1.74793471338876e-213
CHEMBL223360	LINIFANIB	EFO_0003885	multiple sclerosis	3168	4889	798	64102	4.67825869380119	1.19477799075168e-215	FALSE	9.85094453374757e-213
CHEMBL1079175	MK-2206	EFO_0000289	bipolar disorder	2937	5835	839	64102	4.49592758055084	5.10630366495226e-214	FALSE	4.16388201601959e-211
CHEMBL272980	MOCETINOSTAT	EFO_0003758	autism	2992	5501	821	64102	4.55966535691489	6.53622845542013e-214	FALSE	5.27196557102664e-211
CHEMBL572878	TOZASERTIB	EFO_0001073	obesity	2870	7209	930	64102	4.19558391811158	8.07589679665104e-214	FALSE	6.44378410532786e-211
CHEMBL408513	BELINOSTAT	EFO_0003758	autism	3180	5501	850	64102	4.41357262400348	1.57898051806018e-213	FALSE	1.24647073768783e-210
CHEMBL1079175	MK-2206	EFO_0003758	autism	2937	5501	811	64102	4.5933106486906	4.33388731101171e-213	FALSE	3.38522218856446e-210
CHEMBL1976040	AZD-1775	EFO_0000289	bipolar disorder	2693	5835	796	64102	4.69389953632743	7.31019555010404e-213	FALSE	5.65055271661948e-210
CHEMBL223360	LINIFANIB	HP_0003124	hypercholesterolemia	3168	4983	802	64102	4.6009911332089	9.19361069537557e-213	FALSE	7.03311218196231e-210
CHEMBL408513	BELINOSTAT	EFO_0000289	bipolar disorder	3180	5835	877	64102	4.29836494993495	1.13860312140075e-212	FALSE	8.62143312485129e-210
CHEMBL572878	TOZASERTIB	EFO_0003758	autism	2870	5501	799	64102	4.63817506453665	3.05469614107701e-212	FALSE	2.28963360756182e-209
CHEMBL2103875	TRAMETINIB	EFO_0001073	obesity	2703	7209	894	64102	4.3107789546497	4.39680648596896e-212	FALSE	3.26265025291327e-209
CHEMBL180022	NERATINIB	EFO_0001359	type I diabetes mellitus	3106	5458	831	64102	4.44987957903611	4.6610838019165e-211	FALSE	3.42451211407142e-208
CHEMBL1976040	AZD-1775	EFO_0003758	autism	2693	5501	768	64102	4.77722336135409	1.14847608119836e-210	FALSE	8.35516349071809e-208
CHEMBL27759	ENTINOSTAT	EFO_0003758	autism	2971	5501	810	64102	4.50960426218922	7.14210609289818e-209	FALSE	5.14543672450009e-206
CHEMBL272980	MOCETINOSTAT	EFO_0000289	bipolar disorder	2992	5835	840	64102	4.38503174149497	9.52749246406625e-209	FALSE	6.79795748361573e-206
CHEMBL1421	DASATINIB	EFO_0000249	Alzheimers disease	4246	3757	802	64102	4.4839070878861	2.19609587986706e-208	FALSE	1.55201233110033e-205
CHEMBL521851	PICTILISIB	EFO_0000289	bipolar disorder	3076	5835	853	64102	4.31648144818174	3.1741849188947e-208	FALSE	2.22207916893001e-205
CHEMBL98	VORINOSTAT	Orphanet_84	Fanconi anemia	4984	3761	878	64102	4.17092117718121	5.36082532790314e-208	FALSE	3.71775741548647e-205
CHEMBL601719	CRIZOTINIB	EFO_0001073	obesity	2617	7209	869	64102	4.32413853402388	3.56868419126012e-207	FALSE	2.45198342974497e-204
CHEMBL1229517	VEMURAFENIB	EFO_0001359	type I diabetes mellitus	2910	5458	794	64102	4.54773906985374	5.77862273672741e-207	FALSE	3.93396972641154e-204
CHEMBL98	VORINOSTAT	EFO_0000195	metabolic syndrome	4984	3177	794	64102	4.51146855239276	1.40550303681339e-206	FALSE	9.48139571333981e-204
CHEMBL445813	AT-7519	EFO_0003761	unipolar depression	3979	4304	832	64102	4.3136018412991	1.76012902473176e-206	FALSE	1.17667003856054e-203
CHEMBL428690	ALVOCIDIB	EFO_0003761	unipolar depression	4118	4304	848	64102	4.24155664931668	3.95681377792578e-206	FALSE	2.62156577134806e-203
CHEMBL2103875	TRAMETINIB	EFO_0001359	type I diabetes mellitus	2703	5458	759	64102	4.71092456725267	1.17609128527424e-205	FALSE	7.72317290475885e-203
CHEMBL180022	NERATINIB	HP_0003124	hypercholesterolemia	3106	4983	780	64102	4.53110839946436	3.75667351427093e-204	FALSE	2.44529787830241e-201
CHEMBL1229517	VEMURAFENIB	EFO_0000289	bipolar disorder	2910	5835	819	64102	4.38647410746692	5.69054641635592e-204	FALSE	3.67188692891905e-201
CHEMBL98	VORINOSTAT	EFO_0002508	Parkinson's disease	4984	3371	816	64102	4.33403677642352	5.36542308377844e-203	FALSE	3.43225189596361e-200
CHEMBL521851	PICTILISIB	EFO_0000537	hypertension	3076	6014	859	64102	4.19940211504973	6.85995321850088e-203	FALSE	4.3507934066569e-200
CHEMBL27759	ENTINOSTAT	EFO_0000289	bipolar disorder	2971	5835	827	64102	4.32267171070574	1.1928594388803e-202	FALSE	7.50136734424687e-200
CHEMBL1976040	AZD-1775	EFO_0001073	obesity	2693	7209	877	64102	4.20072202020941	1.21614943498171e-202	FALSE	7.58356040527878e-200
CHEMBL1079175	MK-2206	EFO_0001359	type I diabetes mellitus	2937	5458	789	64102	4.44451946780929	6.31669378342257e-201	FALSE	3.90608551832393e-198
CHEMBL325041	BORTEZOMIB	EFO_0000537	hypertension	2931	6014	830	64102	4.26651518497945	6.14236939070554e-200	FALSE	3.76689686477111e-197
CHEMBL1421	DASATINIB	EFO_0004211	Hypertriglyceridemia	4246	3627	773	64102	4.44522983337382	9.47876689530853e-200	FALSE	5.76534342185549e-197
CHEMBL27759	ENTINOSTAT	EFO_0001359	type I diabetes mellitus	2971	5458	792	64102	4.39837488062407	1.95005261561042e-199	FALSE	1.17645247432009e-196
CHEMBL1079175	MK-2206	EFO_0000537	hypertension	2937	6014	830	64102	4.25391613039045	2.65631929649149e-199	FALSE	1.58961430158186e-196
CHEMBL1614701	SELUMETINIB	HP_0003124	hypercholesterolemia	3317	4983	801	64102	4.3089045808388	2.44871137957318e-198	FALSE	1.45365302336982e-195
CHEMBL180022	NERATINIB	EFO_0003885	multiple sclerosis	3106	4889	763	64102	4.48839282337495	2.54110905071976e-198	FALSE	1.4965317230846e-195
CHEMBL521851	PICTILISIB	EFO_0003758	autism	3076	5501	810	64102	4.29271332679131	2.72570345978725e-198	FALSE	1.59260492309853e-195
CHEMBL325041	BORTEZOMIB	EFO_0003758	autism	2931	5501	786	64102	4.38746904418105	2.14757473790586e-197	FALSE	1.245006120518e-194
CHEMBL1614701	SELUMETINIB	EFO_0003885	multiple sclerosis	3317	4889	791	64102	4.33154641305643	2.20676842158057e-197	FALSE	1.26940504436733e-194
CHEMBL1879463	DACTOLISIB	EFO_0003761	unipolar depression	3807	4304	796	64102	4.2793541866616	9.645887548993e-197	FALSE	5.5059468121002e-194
CHEMBL1287853	FEDRATINIB	EFO_0000692	schizophrenia	3684	5048	854	64102	4.0454538037941	7.60069265224073e-196	FALSE	4.30541525388949e-193
CHEMBL1976040	AZD-1775	EFO_0000537	hypertension	2693	6014	783	64102	4.40254097147591	9.00365981955552e-196	FALSE	5.06148921901604e-193
CHEMBL572878	TOZASERTIB	EFO_0001359	type I diabetes mellitus	2870	5458	770	64102	4.42241452737464	2.04898439945974e-195	FALSE	1.14319464181887e-192
CHEMBL572878	TOZASERTIB	EFO_0000537	hypertension	2870	6014	811	64102	4.24154645390066	1.90881343350871e-194	FALSE	1.05704105099637e-191
CHEMBL408513	BELINOSTAT	EFO_0003885	multiple sclerosis	3180	4889	767	64102	4.37991268625956	3.4029964599376e-194	FALSE	1.87051372081237e-191
CHEMBL1976040	AZD-1775	EFO_0001359	type I diabetes mellitus	2693	5458	740	64102	4.55272510084882	4.56312879309321e-194	FALSE	2.48975714773148e-191
CHEMBL428690	ALVOCIDIB	EFO_0000685	rheumatoid arthritis	4118	3417	726	64102	4.55670368923962	6.96804842472167e-194	FALSE	3.77419002449979e-191
CHEMBL325041	BORTEZOMIB	EFO_0001359	type I diabetes mellitus	2931	5458	776	64102	4.34448942690952	3.64664309947155e-193	FALSE	1.96086341446584e-190
CHEMBL507361	PD-0325901	EFO_0000249	Alzheimers disease	4217	3757	775	64102	4.29639523815254	5.50037236736819e-193	FALSE	2.93636785266588e-190
CHEMBL445813	AT-7519	EFO_0004211	Hypertriglyceridemia	3979	3627	735	64102	4.48355096655637	7.51690175968226e-193	FALSE	3.98422639340873e-190
CHEMBL428690	ALVOCIDIB	EFO_0004211	Hypertriglyceridemia	4118	3627	749	64102	4.41118539418781	1.12615150683316e-192	FALSE	5.92667181308896e-190
CHEMBL601719	CRIZOTINIB	EFO_0000537	hypertension	2617	6014	765	64102	4.42538498981452	1.35446879853192e-192	FALSE	7.07805332359588e-190
CHEMBL507361	PD-0325901	EFO_0000378	coronary artery disease	4217	3553	750	64102	4.40521777417879	1.53830781330595e-192	FALSE	7.98252666338238e-190
CHEMBL1079175	MK-2206	EFO_0003885	multiple sclerosis	2937	4889	729	64102	4.52409953546083	9.62973978132321e-192	FALSE	4.96232528106312e-189
CHEMBL1229517	VEMURAFENIB	EFO_0000537	hypertension	2910	6014	812	64102	4.16577438595125	6.93993574433233e-191	FALSE	3.55157194419435e-188
CHEMBL27759	ENTINOSTAT	HP_0003124	hypercholesterolemia	2971	4983	740	64102	4.44698595448868	9.98364801111159e-191	FALSE	5.07422329222285e-188
CHEMBL521851	PICTILISIB	EFO_0003885	multiple sclerosis	3076	4889	747	64102	4.40471354309064	1.10741683979417e-190	FALSE	5.59019500659364e-188
CHEMBL1231160	PEVONEDISTAT	EFO_0001073	obesity	2455	7209	810	64102	4.25140604727373	1.86454830686685e-190	FALSE	9.34856804804422e-188
CHEMBL272980	MOCETINOSTAT	EFO_0003885	multiple sclerosis	2992	4889	734	64102	4.45572443648743	6.4378882453774e-190	FALSE	3.20619796810892e-187
CHEMBL1229517	VEMURAFENIB	EFO_0003758	autism	2910	5501	771	64102	4.3026168986203	6.48968834575393e-190	FALSE	3.21044882464447e-187
CHEMBL27759	ENTINOSTAT	EFO_0003885	multiple sclerosis	2971	4889	730	64102	4.46209489223303	3.0178513894338e-189	FALSE	1.47482471229237e-186
CHEMBL428690	ALVOCIDIB	EFO_0000378	coronary artery disease	4118	3553	735	64102	4.40723058072273	3.02100069090277e-189	FALSE	1.47482471229237e-186
CHEMBL325041	BORTEZOMIB	EFO_0003885	multiple sclerosis	2931	4889	721	64102	4.46167872067295	4.47823511827383e-187	FALSE	2.17194403236281e-184
CHEMBL572878	TOZASERTIB	EFO_0000289	bipolar disorder	2870	5835	785	64102	4.18863003468647	1.27076359124484e-186	FALSE	6.12318261612488e-184
CHEMBL1421	DASATINIB	EFO_0000685	rheumatoid arthritis	4246	3417	726	64102	4.38121805890546	7.81701638756264e-186	FALSE	3.74233355509088e-183
CHEMBL325041	BORTEZOMIB	EFO_0000289	bipolar disorder	2931	5835	793	64102	4.12910691110613	1.91952549613808e-185	FALSE	9.07949576498351e-183
CHEMBL1421	DASATINIB	EFO_0000195	metabolic syndrome	4246	3177	696	64102	4.5337675908856	1.92100375325438e-185	FALSE	9.07949576498351e-183
CHEMBL217092	SARACATINIB	EFO_0003758	autism	2438	5501	688	64102	4.64362336098668	8.27157350653103e-185	FALSE	3.88476020286161e-182
CHEMBL1421	DASATINIB	EFO_0000378	coronary artery disease	4246	3553	740	64102	4.27995326391604	2.53099851473588e-184	FALSE	1.18121223135834e-181
CHEMBL1879463	DACTOLISIB	EFO_0000378	coronary artery disease	3807	3553	695	64102	4.48804353466973	1.13583158672215e-183	FALSE	5.26777393079481e-181
CHEMBL272980	MOCETINOSTAT	EFO_0001359	type I diabetes mellitus	2992	5458	770	64102	4.17069079348866	1.74873298545466e-183	FALSE	8.05992119165609e-181
CHEMBL217092	SARACATINIB	EFO_0001073	obesity	2438	7209	795	64102	4.168184942623	3.26803074370603e-183	FALSE	1.4969396378809e-180
CHEMBL601719	CRIZOTINIB	EFO_0001359	type I diabetes mellitus	2617	5458	711	64102	4.45851193007787	5.47564908930133e-183	FALSE	2.49276405320003e-180
CHEMBL98	VORINOSTAT	EFO_0000673	prostate adenocarcinoma	4984	3249	767	64102	4.15030234486314	6.37593065771577e-183	FALSE	2.88491423448658e-180
CHEMBL408513	BELINOSTAT	HP_0003124	hypercholesterolemia	3180	4983	757	64102	4.1914136892693	9.99486549467734e-183	FALSE	4.49496360019716e-180
CHEMBL2103875	TRAMETINIB	EFO_0000289	bipolar disorder	2703	5835	751	64102	4.26164928606264	1.79751679629375e-182	FALSE	8.03522493186614e-180
CHEMBL507361	PD-0325901	EFO_0000195	metabolic syndrome	4217	3177	687	64102	4.48579695673715	2.89050009028642e-181	FALSE	1.2843686179623e-178
CHEMBL2017974	BUPARLISIB	EFO_0001073	obesity	2439	7209	792	64102	4.14015167544801	3.11997186663677e-181	FALSE	1.37808043073679e-178
CHEMBL98	VORINOSTAT	EFO_0000384	Crohn's disease	4984	3430	789	64102	4.02210297394571	3.71507121204016e-181	FALSE	1.63122401946414e-178
CHEMBL272980	MOCETINOSTAT	HP_0003124	hypercholesterolemia	2992	4983	728	64102	4.29650013020328	4.09866509019604e-181	FALSE	1.78906731187057e-178
CHEMBL572878	TOZASERTIB	EFO_0003885	multiple sclerosis	2870	4889	703	64102	4.4208802238343	5.2835399948635e-181	FALSE	2.2927782767184e-178
CHEMBL1879463	DACTOLISIB	EFO_0000249	Alzheimers disease	3807	3757	713	64102	4.33402665135288	5.55621372222216e-181	FALSE	2.39708627475288e-178
CHEMBL601719	CRIZOTINIB	EFO_0000289	bipolar disorder	2617	5835	734	64102	4.30866950931631	1.01785498820659e-180	FALSE	4.36589187282484e-178
CHEMBL2103875	TRAMETINIB	EFO_0003758	autism	2703	5501	724	64102	4.33626505228194	1.24895635648137e-180	FALSE	5.32636818578734e-178
CHEMBL507361	PD-0325901	EFO_0000685	rheumatoid arthritis	4217	3417	714	64102	4.31178551302445	6.11844951805218e-180	FALSE	2.5943974084975e-177
CHEMBL445813	AT-7519	EFO_0000685	rheumatoid arthritis	3979	3417	691	64102	4.42479027914925	7.23091069424081e-180	FALSE	3.04869163673943e-177
CHEMBL2103847	TOSEDOSTAT	EFO_0001073	obesity	2502	7209	802	64102	4.06420242094537	1.03565098140716e-179	FALSE	4.34183508900103e-177
CHEMBL223360	LINIFANIB	EFO_0000249	Alzheimers disease	3168	3757	639	64102	4.68484647892084	4.61998750818624e-178	FALSE	1.92598973620764e-175
CHEMBL1614701	SELUMETINIB	EFO_0003761	unipolar depression	3317	4304	707	64102	4.30655244895187	5.35672328264632e-178	FALSE	2.22064609602665e-175
CHEMBL223360	LINIFANIB	EFO_0000692	schizophrenia	3168	5048	753	64102	4.11178697133224	7.2988281484975e-178	FALSE	3.00894190421809e-175
CHEMBL445813	AT-7519	EFO_0000378	coronary artery disease	3979	3553	703	64102	4.31222434605457	1.17078262548558e-177	FALSE	4.79988534387609e-175
CHEMBL1231160	PEVONEDISTAT	EFO_0000289	bipolar disorder	2455	5835	702	64102	4.40892589067965	1.42556853135731e-177	FALSE	5.81232488293237e-175
CHEMBL1908394	GSK-461364	EFO_0000537	hypertension	2431	6014	709	64102	4.37462120237342	3.35413509682584e-177	FALSE	1.36007428885225e-174
CHEMBL428690	ALVOCIDIB	EFO_0000249	Alzheimers disease	4118	3757	739	64102	4.12803894523135	6.66798759656633e-177	FALSE	2.68911967175655e-174
CHEMBL601719	CRIZOTINIB	EFO_0003758	autism	2617	5501	704	64102	4.34882464397373	1.63044545271176e-176	FALSE	6.53984890910684e-174
CHEMBL1231160	PEVONEDISTAT	EFO_0000537	hypertension	2455	6014	712	64102	4.34105538392825	1.78673950307706e-176	FALSE	7.12822606590501e-174
CHEMBL1879463	DACTOLISIB	EFO_0000685	rheumatoid arthritis	3807	3417	668	64102	4.45459353607056	7.93631790191623e-176	FALSE	3.14927524016949e-173
CHEMBL1287853	FEDRATINIB	EFO_0003761	unipolar depression	3684	4304	747	64102	4.06577156311266	2.00149486235033e-175	FALSE	7.90004926918651e-173
CHEMBL1879463	DACTOLISIB	EFO_0004211	Hypertriglyceridemia	3807	3627	690	64102	4.3230122584966	2.9440131170849e-175	FALSE	1.15587562620786e-172
CHEMBL1489	AZACITIDINE	EFO_0001073	obesity	2070	7209	707	64102	4.43002017265083	9.77400907025126e-175	FALSE	3.81726496346313e-172
CHEMBL180022	NERATINIB	EFO_0000692	schizophrenia	3106	5048	738	64102	4.09896957895976	5.39410816470242e-174	FALSE	2.0956533840929e-171
CHEMBL1976040	AZD-1775	HP_0003124	hypercholesterolemia	2693	4983	674	64102	4.42354209437069	5.86143581464338e-174	FALSE	2.26535335742506e-171
CHEMBL180022	NERATINIB	EFO_0003761	unipolar depression	3106	4304	674	64102	4.3795457320461	1.58554494546784e-173	FALSE	6.09613278126639e-171
CHEMBL325041	BORTEZOMIB	HP_0003124	hypercholesterolemia	2931	4983	707	64102	4.22975297610618	2.57147519157069e-173	FALSE	9.83589260775789e-171
CHEMBL1229517	VEMURAFENIB	HP_0003124	hypercholesterolemia	2910	4983	704	64102	4.24453040417589	2.69892442947977e-173	FALSE	1.0270445502028e-170
CHEMBL1287853	FEDRATINIB	EFO_0000378	coronary artery disease	3684	3553	666	64102	4.39737032404472	5.51211474814371e-173	FALSE	2.08686976982655e-170
CHEMBL1229517	VEMURAFENIB	EFO_0003885	multiple sclerosis	2910	4889	696	64102	4.2733195642685	5.98713157289471e-173	FALSE	2.25520354500839e-170
CHEMBL1489	AZACITIDINE	EFO_0000537	hypertension	2070	6014	638	64102	4.69515643935981	2.68863293629094e-172	FALSE	1.00762629816903e-169
CHEMBL1614701	SELUMETINIB	EFO_0004211	Hypertriglyceridemia	3317	3627	634	64102	4.56280165268727	4.06078146523267e-172	FALSE	1.51422255591754e-169
CHEMBL2103847	TOSEDOSTAT	EFO_0001359	type I diabetes mellitus	2502	5458	676	64102	4.39858603589951	4.08270810451353e-172	FALSE	1.51478677447713e-169
CHEMBL572878	TOZASERTIB	HP_0003124	hypercholesterolemia	2870	4983	696	64102	4.2525052272022	7.96312381394688e-172	FALSE	2.93981891847725e-169
CHEMBL507361	PD-0325901	Orphanet_84	Fanconi anemia	4217	3761	741	64102	4.01397392304369	1.17382974081418e-171	FALSE	4.31208098599586e-169
CHEMBL2103875	TRAMETINIB	EFO_0000537	hypertension	2703	6014	746	64102	4.06180133659267	1.58777948945856e-171	FALSE	5.8039988677474e-169
CHEMBL1614701	SELUMETINIB	EFO_0000692	schizophrenia	3317	5048	763	64102	3.93925637886704	2.09833534082105e-171	FALSE	7.63269480223657e-169
CHEMBL1976040	AZD-1775	EFO_0003885	multiple sclerosis	2693	4889	663	64102	4.41917890243975	2.2500643666649e-171	FALSE	8.14468421113995e-169
CHEMBL180022	NERATINIB	EFO_0004211	Hypertriglyceridemia	3106	3627	610	64102	4.69592507414067	3.08727629825582e-171	FALSE	1.1120938723887e-168
CHEMBL1231160	PEVONEDISTAT	EFO_0003758	autism	2455	5501	670	64102	4.41428911648756	3.39565691864515e-171	FALSE	1.21726918670562e-168
CHEMBL1908394	GSK-461364	EFO_0003758	autism	2431	5501	666	64102	4.43553895305675	4.33278021820907e-171	FALSE	1.54574017352021e-168
CHEMBL1908394	GSK-461364	EFO_0001073	obesity	2431	7209	773	64102	4.0014626890814	1.31734720590438e-170	FALSE	4.67721289062843e-168
CHEMBL189963	PALBOCICLIB	EFO_0001073	obesity	2222	7209	731	64102	4.19312561253251	2.53870546263446e-170	FALSE	8.97069708832334e-168
CHEMBL2103847	TOSEDOSTAT	EFO_0003758	autism	2502	5501	676	64102	4.35610725820976	3.01931319753226e-170	FALSE	1.06183950626958e-167
CHEMBL521851	PICTILISIB	HP_0003124	hypercholesterolemia	3076	4983	722	64102	4.08603287825981	4.76073215304608e-170	FALSE	1.66636853498483e-167
CHEMBL1287853	FEDRATINIB	EFO_0004211	Hypertriglyceridemia	3684	3627	668	64102	4.30073222224432	2.68130951083204e-169	FALSE	9.34115362682121e-167
CHEMBL27759	ENTINOSTAT	EFO_0004211	Hypertriglyceridemia	2971	3627	592	64102	4.76293973956543	4.98714899535983e-169	FALSE	1.7293055663583e-166
CHEMBL2103847	TOSEDOSTAT	EFO_0000537	hypertension	2502	6014	708	64102	4.18708159560905	6.7207472349187e-169	FALSE	2.31959557473089e-166
CHEMBL1287853	FEDRATINIB	EFO_0000685	rheumatoid arthritis	3684	3417	645	64102	4.41354635715884	9.7756925616222e-169	FALSE	3.35835771544063e-166
CHEMBL502835	NINTEDANIB	EFO_0001359	type I diabetes mellitus	2163	5458	616	64102	4.69529033025465	1.55873071307794e-168	FALSE	5.33021256055062e-166
CHEMBL2103875	TRAMETINIB	HP_0003124	hypercholesterolemia	2703	4983	666	64102	4.32305469252247	6.63534326265571e-168	FALSE	2.25860388442829e-165
CHEMBL98	VORINOSTAT	EFO_0002614	insulin resistance	4984	2330	611	64102	4.66522638331647	1.29604474335548e-167	FALSE	4.39146119546545e-165
CHEMBL223360	LINIFANIB	EFO_0004211	Hypertriglyceridemia	3168	3627	611	64102	4.58905472396083	1.93166794913649e-167	FALSE	6.51542818934877e-165
CHEMBL445813	AT-7519	EFO_0000249	Alzheimers disease	3979	3757	709	64102	4.05997137363824	2.70760746939927e-167	FALSE	9.09131277225215e-165
CHEMBL521851	PICTILISIB	EFO_0003761	unipolar depression	3076	4304	660	64102	4.30161073999726	5.82415079438141e-167	FALSE	1.93803188204965e-164
CHEMBL217092	SARACATINIB	EFO_0000537	hypertension	2438	6014	694	64102	4.21457041756389	6.09150348601328e-167	FALSE	2.01794650080185e-164
CHEMBL2017974	BUPARLISIB	EFO_0000289	bipolar disorder	2439	5835	682	64102	4.25675066752677	1.55755593460216e-166	FALSE	5.13681947231792e-164
CHEMBL2017974	BUPARLISIB	EFO_0003758	autism	2439	5501	660	64102	4.35454214978442	2.07960989025965e-166	FALSE	6.8282058365804e-164
CHEMBL2017974	BUPARLISIB	EFO_0000537	hypertension	2439	6014	693	64102	4.20274492203603	3.27715958848214e-166	FALSE	1.07128470160052e-163
CHEMBL428690	ALVOCIDIB	EFO_0000195	metabolic syndrome	4118	3177	654	64102	4.29973516171644	9.51662756861036e-166	FALSE	3.09728661723128e-163
CHEMBL1908394	GSK-461364	EFO_0000289	bipolar disorder	2431	5835	679	64102	4.24802906333102	1.75331595214406e-165	FALSE	5.68143276108514e-163
CHEMBL601719	CRIZOTINIB	EFO_0003885	multiple sclerosis	2617	4889	643	64102	4.39100045133582	1.8965589063155e-165	FALSE	6.11887624535398e-163
CHEMBL502835	NINTEDANIB	EFO_0001073	obesity	2163	7209	711	64102	4.17800762741381	2.91303955279465e-165	FALSE	9.3576666673215e-163
CHEMBL217092	SARACATINIB	EFO_0001359	type I diabetes mellitus	2438	5458	655	64102	4.34895497790198	3.98615482677175e-165	FALSE	1.27496818500258e-162
CHEMBL223360	LINIFANIB	EFO_0003761	unipolar depression	3168	4304	668	64102	4.21057972524459	6.74339754210416e-165	FALSE	2.14761293824824e-162
CHEMBL2017974	BUPARLISIB	EFO_0001359	type I diabetes mellitus	2439	5458	654	64102	4.33640027903563	2.18441343272011e-164	FALSE	6.92711105876049e-162
CHEMBL1421	DASATINIB	EFO_0000384	Crohn's disease	4246	3430	693	64102	4.07042413874682	3.3753238310914e-164	FALSE	1.06581236121761e-161
CHEMBL408513	BELINOSTAT	EFO_0000692	schizophrenia	3180	5048	731	64102	3.91397104848456	1.42163677853009e-163	FALSE	4.4700236080858e-161
CHEMBL1079175	MK-2206	HP_0003124	hypercholesterolemia	2937	4983	692	64102	4.08552359425982	1.65858974049524e-163	FALSE	5.19306547229745e-161
CHEMBL1289494	TIVOZANIB	EFO_0001073	obesity	2141	7209	703	64102	4.16714676196482	4.82947055821873e-163	FALSE	1.50575992761605e-160
CHEMBL428690	ALVOCIDIB	EFO_0000384	Crohn's disease	4118	3430	679	64102	4.1075830612521	5.47857097041788e-163	FALSE	1.70099313330485e-160
CHEMBL1231160	PEVONEDISTAT	EFO_0001359	type I diabetes mellitus	2455	5458	654	64102	4.29668505783552	8.65384749173578e-163	FALSE	2.67566147135106e-160
CHEMBL1289494	TIVOZANIB	EFO_0000289	bipolar disorder	2141	5835	625	64102	4.490628706872	3.29052288553855e-162	FALSE	1.01316701544144e-159
CHEMBL2103875	TRAMETINIB	EFO_0003885	multiple sclerosis	2703	4889	650	64102	4.26918846572567	3.5620639144132e-162	FALSE	1.0922436064836e-159
CHEMBL552212	LEXIBULIN	EFO_0001073	obesity	1991	7209	671	64102	4.32090587398641	4.64448674797059e-162	FALSE	1.41828863840806e-159
CHEMBL1614701	SELUMETINIB	EFO_0000378	coronary artery disease	3317	3553	611	64102	4.43919139497463	9.71932666711622e-162	FALSE	2.9558304726777e-159
CHEMBL325041	BORTEZOMIB	EFO_0004211	Hypertriglyceridemia	2931	3627	576	64102	4.65888629084537	3.39361359403427e-161	FALSE	1.02784937447066e-158
CHEMBL601719	CRIZOTINIB	HP_0003124	hypercholesterolemia	2617	4983	643	64102	4.28888514250245	3.91811094716575e-161	FALSE	1.1818838326603e-158
CHEMBL1421	DASATINIB	Orphanet_84	Fanconi anemia	4246	3761	726	64102	3.86148836917626	5.6118597784091e-161	FALSE	1.68594354193056e-158
CHEMBL1287853	FEDRATINIB	EFO_0000249	Alzheimers disease	3684	3757	668	64102	4.11046963162493	6.47303237504951e-161	FALSE	1.9368200298006e-158
CHEMBL483254	PANOBINOSTAT	EFO_0001073	obesity	2060	7209	683	64102	4.21959424039095	9.13209343317219e-161	FALSE	2.7214738683074e-158
CHEMBL507361	PD-0325901	EFO_0000673	prostate adenocarcinoma	4217	3249	663	64102	4.13339866058013	1.56286516338492e-160	FALSE	4.63889637795913e-158
CHEMBL1230609	FORETINIB	EFO_0001359	type I diabetes mellitus	2302	5458	626	64102	4.40347464017448	2.44144829892362e-160	FALSE	7.21783549886962e-158
CHEMBL445813	AT-7519	EFO_0000195	metabolic syndrome	3979	3177	633	64102	4.28164445452953	2.63009796019821e-160	FALSE	7.74469917208366e-158
CHEMBL428690	ALVOCIDIB	Orphanet_84	Fanconi anemia	4118	3761	711	64102	3.89561143762974	9.96567888291791e-160	FALSE	2.92293755536334e-157
CHEMBL507361	PD-0325901	EFO_0002508	Parkinson's disease	4217	3371	676	64102	4.0511575043378	1.06159727403125e-159	FALSE	3.1014104613972e-157
CHEMBL1421	DASATINIB	EFO_0002508	Parkinson's disease	4246	3371	677	64102	4.02486182415353	1.0821393616831e-158	FALSE	3.14902554249783e-156
CHEMBL217092	SARACATINIB	EFO_0000289	bipolar disorder	2438	5835	669	64102	4.13604550093398	1.55751547204324e-158	FALSE	4.51466545324096e-156
CHEMBL502835	NINTEDANIB	EFO_0000537	hypertension	2163	6014	633	64102	4.34851670238674	2.94357785341305e-158	FALSE	8.49915154134301e-156
CHEMBL223360	LINIFANIB	EFO_0000685	rheumatoid arthritis	3168	3417	577	64102	4.5545602459476	7.13421001738174e-158	FALSE	2.0519149393016e-155
CHEMBL521851	PICTILISIB	EFO_0000692	schizophrenia	3076	5048	707	64102	3.89718836001253	7.74539449746682e-158	FALSE	2.21910038102133e-155
CHEMBL27759	ENTINOSTAT	EFO_0000692	schizophrenia	2971	5048	692	64102	3.95771588115888	1.48197851716475e-157	FALSE	4.22962368716194e-155
CHEMBL507361	PD-0325901	EFO_0000384	Crohn's disease	4217	3430	679	64102	3.98581716356412	2.33685199482837e-157	FALSE	6.64391196460687e-155
CHEMBL2017974	BUPARLISIB	EFO_0003885	multiple sclerosis	2439	4889	605	64102	4.41821273154831	2.45285974654227e-157	FALSE	6.9471166981744e-155
CHEMBL1614701	SELUMETINIB	EFO_0000685	rheumatoid arthritis	3317	3417	591	64102	4.44623565759866	2.97411753284737e-157	FALSE	8.39142173098627e-155
CHEMBL1489	AZACITIDINE	EFO_0000289	bipolar disorder	2070	5835	605	64102	4.48508436315125	4.2176562494759e-157	FALSE	1.18549690148621e-154
CHEMBL1230609	FORETINIB	EFO_0001073	obesity	2302	7209	725	64102	3.92234963093874	5.10846507850768e-157	FALSE	1.43046660811571e-154
CHEMBL521851	PICTILISIB	EFO_0000249	Alzheimers disease	3076	3757	596	64102	4.39915247818646	1.7770549602141e-156	FALSE	4.95738207980029e-154
CHEMBL1079175	MK-2206	EFO_0003761	unipolar depression	2937	4304	626	64102	4.23371570344722	2.55972579629546e-156	FALSE	7.11402444622114e-154
CHEMBL1287853	FEDRATINIB	EFO_0000195	metabolic syndrome	3684	3177	600	64102	4.36658074625341	3.08753849570308e-156	FALSE	8.54891022662862e-154
CHEMBL408513	BELINOSTAT	EFO_0003761	unipolar depression	3180	4304	654	64102	4.06248333090066	2.31248175045227e-155	FALSE	6.37909696253942e-153
CHEMBL1289494	TIVOZANIB	EFO_0003758	autism	2141	5501	595	64102	4.47571848495983	2.53662628115544e-155	FALSE	6.97149456270886e-153
CHEMBL1976040	AZD-1775	EFO_0000692	schizophrenia	2693	5048	649	64102	4.11493733340261	3.46299686305142e-155	FALSE	9.48234989751773e-153
CHEMBL1078983	AZD-2014	EFO_0001073	obesity	2110	7209	684	64102	4.0776752858436	3.60465205746372e-155	FALSE	9.8339413942682e-153
CHEMBL1078983	AZD-2014	EFO_0001359	type I diabetes mellitus	2110	5458	587	64102	4.51963556722545	5.17286123554564e-155	FALSE	1.40605189737606e-152
CHEMBL1229517	VEMURAFENIB	EFO_0003761	unipolar depression	2910	4304	620	64102	4.22624427340511	1.21818792190598e-154	FALSE	3.299110757118e-152
CHEMBL189963	PALBOCICLIB	EFO_0001359	type I diabetes mellitus	2222	5458	604	64102	4.38554587602047	2.23186852152568e-154	FALSE	6.02239285962957e-152
CHEMBL521851	PICTILISIB	EFO_0004211	Hypertriglyceridemia	3076	3627	581	64102	4.4323728798833	3.15270016170337e-154	FALSE	8.47630853257965e-152
CHEMBL408513	BELINOSTAT	EFO_0000378	coronary artery disease	3180	3553	585	64102	4.401701787	4.32397061070686e-154	FALSE	1.15834021360109e-151
CHEMBL1079175	MK-2206	EFO_0000692	schizophrenia	2937	5048	681	64102	3.92622043092225	8.21695171052329e-154	FALSE	2.19330540172439e-151
CHEMBL408513	BELINOSTAT	EFO_0004211	Hypertriglyceridemia	3180	3627	591	64102	4.35221672986533	1.3487151199112e-153	FALSE	3.58714714957028e-151
CHEMBL1908394	GSK-461364	HP_0003124	hypercholesterolemia	2431	4983	604	64102	4.32522220401707	2.21299063004042e-153	FALSE	5.86482034650533e-151
CHEMBL1289494	TIVOZANIB	EFO_0001359	type I diabetes mellitus	2141	5458	589	64102	4.4498855369378	4.66612386643978e-153	FALSE	1.23220541462336e-150
CHEMBL572878	TOZASERTIB	EFO_0000692	schizophrenia	2870	5048	670	64102	3.95504926320115	8.30568774016489e-153	FALSE	2.18554453460615e-150
CHEMBL2103847	TOSEDOSTAT	EFO_0000289	bipolar disorder	2502	5835	669	64102	3.98721985209274	3.48921969573072e-152	FALSE	9.14902994776318e-150
CHEMBL1078983	AZD-2014	EFO_0000289	bipolar disorder	2110	5835	604	64102	4.35184980707294	4.71046630669688e-152	FALSE	1.23077518411423e-149
CHEMBL552212	LEXIBULIN	EFO_0001359	type I diabetes mellitus	1991	5458	563	64102	4.60819021167235	5.87833957216313e-152	FALSE	1.53053399281532e-149
CHEMBL180022	NERATINIB	EFO_0000378	coronary artery disease	3106	3553	574	64102	4.41484446458969	6.07273953551225e-152	FALSE	1.5756211092052e-149
CHEMBL552212	LEXIBULIN	EFO_0000537	hypertension	1991	6014	593	64102	4.43576838451386	7.18884432617472e-152	FALSE	1.85870450600625e-149
CHEMBL180022	NERATINIB	EFO_0000249	Alzheimers disease	3106	3757	592	64102	4.30257023976398	7.83487950983611e-152	FALSE	2.01870567370621e-149
CHEMBL1231160	PEVONEDISTAT	HP_0003124	hypercholesterolemia	2455	4983	605	64102	4.27780098353977	8.07659026458645e-152	FALSE	2.07378332381882e-149
CHEMBL223360	LINIFANIB	EFO_0000378	coronary artery disease	3168	3553	580	64102	4.36905611117553	1.12732743687403e-151	FALSE	2.8845976708013e-149
CHEMBL1287853	FEDRATINIB	Orphanet_84	Fanconi anemia	3684	3761	653	64102	3.97259398475889	1.45458507811811e-151	FALSE	3.70919194920117e-149
CHEMBL255863	NILOTINIB	EFO_0001073	obesity	2045	7209	665	64102	4.08804354564016	1.70288251504379e-151	FALSE	4.3274793503022e-149
CHEMBL1287853	FEDRATINIB	EFO_0000384	Crohn's disease	3684	3430	619	64102	4.13869399102011	1.85221106761697e-151	FALSE	4.69089837107567e-149
CHEMBL189963	PALBOCICLIB	EFO_0003758	autism	2222	5501	602	64102	4.32214615652642	1.9171880726999e-151	FALSE	4.83894356920734e-149
CHEMBL428690	ALVOCIDIB	EFO_0000673	prostate adenocarcinoma	4118	3249	639	64102	4.03755687967654	2.98864767655841e-151	FALSE	7.51771528267853e-149
CHEMBL1879463	DACTOLISIB	EFO_0000195	metabolic syndrome	3807	3177	603	64102	4.22023794867807	4.13720059278928e-151	FALSE	1.03716543914841e-148
CHEMBL1231160	PEVONEDISTAT	EFO_0003885	multiple sclerosis	2455	4889	597	64102	4.2937018591087	9.21395808149953e-151	FALSE	2.30209346612011e-148
CHEMBL1908394	GSK-461364	EFO_0001359	type I diabetes mellitus	2431	5458	631	64102	4.1282905662985	9.49957934786821e-151	FALSE	2.36549089096833e-148
CHEMBL483254	PANOBINOSTAT	EFO_0000537	hypertension	2060	6014	603	64102	4.33145283740852	1.53952126315906e-150	FALSE	3.82074164992369e-148
CHEMBL1614701	SELUMETINIB	EFO_0000249	Alzheimers disease	3317	3757	612	64102	4.14645058745176	3.39286253202996e-150	FALSE	8.39224547297612e-148
CHEMBL1229517	VEMURAFENIB	EFO_0004211	Hypertriglyceridemia	2910	3627	557	64102	4.48143801366032	3.79965400945146e-150	FALSE	9.36722012529387e-148
CHEMBL1230609	FORETINIB	EFO_0000289	bipolar disorder	2302	5835	633	64102	4.12655793208362	3.92629472070437e-150	FALSE	9.6473741639029e-148
CHEMBL1078983	AZD-2014	EFO_0000537	hypertension	2110	6014	611	64102	4.26912735168845	4.06429286386561e-150	FALSE	9.95349346413028e-148
CHEMBL445813	AT-7519	EFO_0002508	Parkinson's disease	3979	3371	638	64102	4.00994748356212	5.79948110336371e-150	FALSE	1.41562662919442e-147
CHEMBL865	VALDECOXIB	EFO_0000537	hypertension	1757	6014	548	64102	4.71652714104949	8.83510343949766e-150	FALSE	2.14953721550139e-147
CHEMBL1079175	MK-2206	EFO_0004211	Hypertriglyceridemia	2937	3627	559	64102	4.45123480544829	1.44449247884676e-149	FALSE	3.50289426120338e-147
CHEMBL502835	NINTEDANIB	EFO_0000289	bipolar disorder	2163	5835	609	64102	4.25286326167842	1.45136903142461e-149	FALSE	3.50810550413235e-147
CHEMBL483254	PANOBINOSTAT	EFO_0003758	autism	2060	5501	573	64102	4.46586086112856	1.46930947953184e-149	FALSE	3.53993863404742e-147
CHEMBL272980	MOCETINOSTAT	EFO_0000692	schizophrenia	2992	5048	681	64102	3.82915436090456	2.40784327349935e-149	FALSE	5.78233042427246e-147
CHEMBL1489	AZACITIDINE	EFO_0001359	type I diabetes mellitus	2070	5458	571	64102	4.45410215740716	8.70767288893173e-149	FALSE	2.0843640862038e-146
CHEMBL98	VORINOSTAT	EFO_0001645	coronary heart disease	4984	2120	551	64102	4.55882664833415	1.27707228055314e-148	FALSE	3.04711088676673e-146
CHEMBL1489	AZACITIDINE	EFO_0003758	autism	2070	5501	573	64102	4.43526351513432	1.65816801859764e-148	FALSE	3.9437294173089e-146
CHEMBL428690	ALVOCIDIB	EFO_0002508	Parkinson's disease	4118	3371	648	64102	3.92701419254086	2.58485964061342e-148	FALSE	6.12809934925619e-146
CHEMBL939	GEFITINIB	EFO_0001359	type I diabetes mellitus	2112	5458	577	64102	4.39799848391415	2.62996229382758e-148	FALSE	6.21517044628902e-146
CHEMBL2103847	TOSEDOSTAT	EFO_0003885	multiple sclerosis	2502	4889	599	64102	4.20491531791253	7.44641723786979e-148	FALSE	1.7541631464639e-145
CHEMBL217092	SARACATINIB	HP_0003124	hypercholesterolemia	2438	4983	596	64102	4.2244017633188	1.07836913280465e-147	FALSE	2.53229055379016e-145
CHEMBL939	GEFITINIB	EFO_0000289	bipolar disorder	2112	5835	597	64102	4.26951483703347	2.15062031516297e-147	FALSE	5.03428329610941e-145
CHEMBL408513	BELINOSTAT	EFO_0000685	rheumatoid arthritis	3180	3417	562	64102	4.36588894652019	2.41494578897157e-147	FALSE	5.63525321605772e-145
CHEMBL502835	NINTEDANIB	EFO_0003758	autism	2163	5501	586	64102	4.31118050595822	2.95220815583256e-147	FALSE	6.86735442644374e-145
CHEMBL1079175	MK-2206	EFO_0000378	coronary artery disease	2937	3553	549	64102	4.45094325501582	3.56583685851086e-147	FALSE	8.2688413776812e-145
CHEMBL601719	CRIZOTINIB	EFO_0004211	Hypertriglyceridemia	2617	3627	520	64102	4.65874022048017	9.47714312321032e-147	FALSE	2.19081434722063e-144
CHEMBL483254	PANOBINOSTAT	EFO_0000289	bipolar disorder	2060	5835	587	64102	4.31263673363822	1.30970313896353e-146	FALSE	3.0182149511425e-144
CHEMBL1614701	SELUMETINIB	EFO_0000195	metabolic syndrome	3317	3177	551	64102	4.41167823616116	2.14921752631733e-146	FALSE	4.93754447493428e-144
CHEMBL223360	LINIFANIB	EFO_0000195	metabolic syndrome	3168	3177	537	64102	4.50611003210701	2.5147124657029e-146	FALSE	5.7593900777001e-144
CHEMBL445813	AT-7519	Orphanet_84	Fanconi anemia	3979	3761	674	64102	3.76806931465286	2.75251904562556e-146	FALSE	6.284636177866e-144
CHEMBL445813	AT-7519	EFO_0000384	Crohn's disease	3979	3430	638	64102	3.92123507631352	4.36062179772836e-146	FALSE	9.92576504602556e-144
CHEMBL1229517	VEMURAFENIB	EFO_0000692	schizophrenia	2910	5048	664	64102	3.83110782783848	5.42031780442469e-146	FALSE	1.23001432011417e-143
CHEMBL27759	ENTINOSTAT	EFO_0000249	Alzheimers disease	2971	3757	568	64102	4.29455654532943	6.53937406696951e-146	FALSE	1.47943369707156e-143
CHEMBL2103875	TRAMETINIB	EFO_0004211	Hypertriglyceridemia	2703	3627	528	64102	4.56670535460764	8.3752462288697e-146	FALSE	1.88901260307987e-143
CHEMBL27759	ENTINOSTAT	EFO_0003761	unipolar depression	2971	4304	613	64102	4.04563595255969	9.85102337132602e-146	FALSE	2.21513693717954e-143
CHEMBL2103875	TRAMETINIB	EFO_0003761	unipolar depression	2703	4304	580	64102	4.23102827208901	1.32918299763778e-145	FALSE	2.97981946645654e-143
CHEMBL601719	CRIZOTINIB	EFO_0000692	schizophrenia	2617	5048	622	64102	4.01948623630816	2.69468292117459e-145	FALSE	6.0228598242699e-143
CHEMBL572878	TOZASERTIB	EFO_0003761	unipolar depression	2870	4304	600	64102	4.10515745989589	2.82584723738907e-145	FALSE	6.29705688439809e-143
CHEMBL552212	LEXIBULIN	EFO_0003758	autism	1991	5501	555	64102	4.46688147118576	3.77015288371112e-145	FALSE	8.37617349508334e-143
CHEMBL1879463	DACTOLISIB	EFO_0000673	prostate adenocarcinoma	3807	3249	601	64102	4.08095932057802	4.50564406738388e-145	FALSE	9.98033785134986e-143
CHEMBL2028663	DABRAFENIB	EFO_0001073	obesity	2117	7209	668	64102	3.90798611704974	1.03943644744274e-144	FALSE	2.29557683281215e-142
CHEMBL325041	BORTEZOMIB	EFO_0003761	unipolar depression	2931	4304	606	64102	4.05085004177426	2.04138139061304e-144	FALSE	4.49497644185283e-142
CHEMBL325041	BORTEZOMIB	EFO_0000378	coronary artery disease	2931	3553	544	64102	4.40500227358248	2.39931819828995e-144	FALSE	5.26749724568361e-142
CHEMBL1289494	TIVOZANIB	EFO_0000537	hypertension	2141	6014	607	64102	4.13886668321075	2.65343578198903e-144	FALSE	5.80820655464589e-142
CHEMBL939	GEFITINIB	EFO_0001073	obesity	2112	7209	666	64102	3.90339042237165	4.16935295676377e-144	FALSE	9.09961282813692e-142
CHEMBL554	LAPATINIB	EFO_0001073	obesity	1865	7209	616	64102	4.16266072263984	1.23589396228095e-143	FALSE	2.68942848888732e-141
CHEMBL1879463	DACTOLISIB	Orphanet_84	Fanconi anemia	3807	3761	652	64102	3.80128031324224	1.44251301505963e-143	FALSE	3.12987363399122e-141
CHEMBL255863	NILOTINIB	EFO_0000537	hypertension	2045	6014	589	64102	4.22300706299347	2.45772911895123e-143	FALSE	5.31707840442496e-141
CHEMBL1289494	TIVOZANIB	EFO_0003885	multiple sclerosis	2141	4889	539	64102	4.4558323696547	1.89094963169481e-142	FALSE	4.07900922732306e-140
CHEMBL178	DAUNORUBICIN	EFO_0000537	hypertension	1724	6014	531	64102	4.6184717468078	2.12823192168683e-142	FALSE	4.57754926808033e-140
CHEMBL1230609	FORETINIB	EFO_0003758	autism	2302	5501	600	64102	4.09280944396355	2.50371036112972e-142	FALSE	5.36959038576968e-140
CHEMBL2017974	BUPARLISIB	HP_0003124	hypercholesterolemia	2439	4983	587	64102	4.12900980735156	5.17100167257951e-142	FALSE	1.10580455076012e-139
CHEMBL1908394	GSK-461364	EFO_0004211	Hypertriglyceridemia	2431	3627	492	64102	4.73754036566139	8.37476653589414e-142	FALSE	1.78577457125294e-139
CHEMBL939	GEFITINIB	EFO_0003758	autism	2112	5501	569	64102	4.26617489288496	1.21453195910448e-141	FALSE	2.58235942766039e-139
CHEMBL178	DAUNORUBICIN	EFO_0000289	bipolar disorder	1724	5835	521	64102	4.65049638574724	2.39422522786557e-141	FALSE	5.07609951525042e-139
CHEMBL408513	BELINOSTAT	EFO_0000249	Alzheimers disease	3180	3757	583	64102	4.08431152597303	2.7447838191393e-141	FALSE	5.80275450994963e-139
CHEMBL2028663	DABRAFENIB	EFO_0001359	type I diabetes mellitus	2117	5458	566	64102	4.25892471907858	8.53569226543455e-141	FALSE	1.79940637658117e-138
CHEMBL272980	MOCETINOSTAT	EFO_0003761	unipolar depression	2992	4304	607	64102	3.95246783762332	1.34386415786844e-140	FALSE	2.82496996698661e-138
CHEMBL223360	LINIFANIB	EFO_0002508	Parkinson's disease	3168	3371	546	64102	4.28320290362128	1.36684066127109e-140	FALSE	2.86515286072377e-138
CHEMBL1908394	GSK-461364	EFO_0003885	multiple sclerosis	2431	4889	577	64102	4.13989593407394	2.30588513134483e-140	FALSE	4.81994946961812e-138
CHEMBL2103847	TOSEDOSTAT	HP_0003124	hypercholesterolemia	2502	4983	593	64102	4.04822068114438	3.07313610014395e-140	FALSE	6.40567596379724e-138
CHEMBL1079175	MK-2206	EFO_0000249	Alzheimers disease	2937	3757	555	64102	4.21762263708287	4.76880033979963e-140	FALSE	9.91229213486923e-138
CHEMBL521851	PICTILISIB	EFO_0000378	coronary artery disease	3076	3553	552	64102	4.2284816400918	6.50466028901559e-140	FALSE	1.34826345459889e-137
CHEMBL1230609	FORETINIB	EFO_0003885	multiple sclerosis	2302	4889	558	64102	4.24548918080217	7.85876501776043e-140	FALSE	1.62440016195797e-137
CHEMBL217092	SARACATINIB	EFO_0003885	multiple sclerosis	2438	4889	577	64102	4.12383114615679	9.22956776651042e-140	FALSE	1.90244465587196e-137
CHEMBL483254	PANOBINOSTAT	EFO_0001359	type I diabetes mellitus	2060	5458	555	64102	4.29758194632242	1.50995914534788e-139	FALSE	3.10378167259113e-137
CHEMBL1230609	FORETINIB	EFO_0000537	hypertension	2302	6014	626	64102	3.91087672549335	1.97398023059445e-139	FALSE	4.0463868235155e-137
CHEMBL572878	TOZASERTIB	EFO_0000378	coronary artery disease	2870	3553	529	64102	4.34949008731158	8.42317745625732e-139	FALSE	1.72187846595475e-136
CHEMBL1489	AZACITIDINE	HP_0003124	hypercholesterolemia	2070	4983	528	64102	4.4252610199523	1.71623487572164e-138	FALSE	3.49871453167375e-136
CHEMBL1421	DASATINIB	EFO_0002614	insulin resistance	4246	2330	518	64102	4.45078541704397	1.7293837604457e-138	FALSE	3.5158608751746e-136
CHEMBL1171837	PONATINIB	EFO_0000537	hypertension	1865	6014	550	64102	4.34577536063597	1.90486483516608e-138	FALSE	3.86203538506827e-136
CHEMBL1879463	DACTOLISIB	EFO_0000384	Crohn's disease	3807	3430	609	64102	3.8798408601226	2.08465495395819e-138	FALSE	4.21503599069394e-136
CHEMBL1287853	FEDRATINIB	EFO_0002508	Parkinson's disease	3684	3371	591	64102	3.96159955549832	4.0106079977963e-138	FALSE	8.08715126294767e-136
CHEMBL572878	TOZASERTIB	EFO_0004211	Hypertriglyceridemia	2870	3627	534	64102	4.29675314637054	4.25572289834526e-138	FALSE	8.55815495045285e-136
CHEMBL189963	PALBOCICLIB	EFO_0000537	hypertension	2222	6014	610	64102	3.95493775476265	7.91264082650997e-138	FALSE	1.58366837086422e-135
CHEMBL1287853	FEDRATINIB	EFO_0000673	prostate adenocarcinoma	3684	3249	578	64102	4.02324967456566	7.91780830928677e-138	FALSE	1.58366837086422e-135
CHEMBL502835	NINTEDANIB	HP_0003124	hypercholesterolemia	2163	4983	540	64102	4.30555571577881	1.94838046995887e-137	FALSE	3.88654765519618e-135
CHEMBL1976040	AZD-1775	EFO_0004211	Hypertriglyceridemia	2693	3627	514	64102	4.41720957451024	2.28178066820535e-137	FALSE	4.53939770735061e-135
CHEMBL502835	NINTEDANIB	EFO_0003885	multiple sclerosis	2163	4889	534	64102	4.33435559719348	3.45988284735758e-137	FALSE	6.86472210396173e-135
CHEMBL180022	NERATINIB	EFO_0000195	metabolic syndrome	3106	3177	517	64102	4.37920986050586	4.05702387038049e-137	FALSE	8.02803883470892e-135
CHEMBL27759	ENTINOSTAT	EFO_0000685	rheumatoid arthritis	2971	3417	525	64102	4.32216892943888	5.31931316505716e-137	FALSE	1.0497862590773e-134
CHEMBL189963	PALBOCICLIB	EFO_0000289	bipolar disorder	2222	5835	598	64102	3.9829181233572	8.26045878525816e-137	FALSE	1.62590807469518e-134
CHEMBL1229517	VEMURAFENIB	EFO_0000378	coronary artery disease	2910	3553	530	64102	4.28486054920534	8.45578116058388e-137	FALSE	1.65995037307176e-134
CHEMBL1231160	PEVONEDISTAT	EFO_0003761	unipolar depression	2455	4304	535	64102	4.27886411472678	9.17833019886887e-137	FALSE	1.79703955780228e-134
CHEMBL445813	AT-7519	EFO_0000673	prostate adenocarcinoma	3979	3249	602	64102	3.8708686297822	1.74091056544581e-136	FALSE	3.39958601339227e-134
CHEMBL939	GEFITINIB	EFO_0000537	hypertension	2112	6014	589	64102	4.03258406071928	2.67649773016429e-136	FALSE	5.2128481382373e-134
CHEMBL325041	BORTEZOMIB	EFO_0000692	schizophrenia	2931	5048	650	64102	3.67809485514624	2.69491427996296e-136	FALSE	5.2349768100694e-134
CHEMBL1751	DIGOXIN	EFO_0000289	bipolar disorder	1932	5835	549	64102	4.27184008802267	3.0547239225236e-136	FALSE	5.91842790263351e-134
CHEMBL180022	NERATINIB	EFO_0000685	rheumatoid arthritis	3106	3417	537	64102	4.21792340612589	3.83559760760792e-136	FALSE	7.4119927206392e-134
CHEMBL1879463	DACTOLISIB	EFO_0002508	Parkinson's disease	3807	3371	599	64102	3.87479147460014	3.85215712493102e-136	FALSE	7.42465764819498e-134
CHEMBL255863	NILOTINIB	EFO_0003758	autism	2045	5501	549	64102	4.23190099568908	9.09851122349141e-136	FALSE	1.74910628326213e-133
CHEMBL272980	MOCETINOSTAT	EFO_0000195	metabolic syndrome	2992	3177	504	64102	4.42844224996553	1.31745289475194e-135	FALSE	2.52613932958832e-133
CHEMBL27759	ENTINOSTAT	EFO_0000378	coronary artery disease	2971	3553	534	64102	4.21768749131304	2.28346975209468e-135	FALSE	4.36713590088108e-133
CHEMBL1231160	PEVONEDISTAT	EFO_0004211	Hypertriglyceridemia	2455	3627	485	64102	4.5839878898143	2.44325095634388e-135	FALSE	4.66070532687654e-133
CHEMBL507361	PD-0325901	EFO_0002614	insulin resistance	4217	2330	511	64102	4.40138408838426	3.30025155770745e-135	FALSE	6.27936325229953e-133
CHEMBL603469	LESTAURTINIB	EFO_0000537	hypertension	1691	6014	514	64102	4.51868443796938	4.34170000852953e-135	FALSE	8.23979153792671e-133
CHEMBL601719	CRIZOTINIB	EFO_0000249	Alzheimers disease	2617	3757	512	64102	4.36523940488322	5.25922898244618e-135	FALSE	9.95563996536783e-133
CHEMBL1976040	AZD-1775	EFO_0000249	Alzheimers disease	2693	3757	519	64102	4.28867010241462	4.01409471338446e-134	FALSE	7.57928494164616e-132
CHEMBL2028663	DABRAFENIB	EFO_0000537	hypertension	2117	6014	586	64102	3.98834652755216	5.58389164018788e-134	FALSE	1.05165654609173e-131
CHEMBL272980	MOCETINOSTAT	EFO_0004211	Hypertriglyceridemia	2992	3627	540	64102	4.1392911850006	7.21861619581101e-134	FALSE	1.35609472103837e-131
CHEMBL325041	BORTEZOMIB	EFO_0000249	Alzheimers disease	2931	3757	544	64102	4.11093499435152	1.25730519249953e-133	FALSE	2.35601848003606e-131
CHEMBL255863	NILOTINIB	EFO_0001359	type I diabetes mellitus	2045	5458	543	64102	4.20305059799411	1.7186569328373e-133	FALSE	3.21241656678065e-131
CHEMBL1751	DIGOXIN	EFO_0001073	obesity	1932	7209	612	64102	3.90598641814604	4.2569413520763e-133	FALSE	7.93684253846286e-131
CHEMBL1614701	SELUMETINIB	Orphanet_84	Fanconi anemia	3317	3761	584	64102	3.87477275366819	4.49009798638424e-133	FALSE	8.35056945061761e-131
CHEMBL98	VORINOSTAT	EFO_0000270	asthma	4984	2121	527	64102	4.2670085218949	4.83454140322915e-133	FALSE	8.96867862066547e-131
CHEMBL1241855	RIGOSERTIB	EFO_0003758	autism	1885	5501	519	64102	4.36484727518502	5.11338962418236e-133	FALSE	9.43878301150377e-131
CHEMBL223360	LINIFANIB	EFO_0000384	Crohn's disease	3168	3430	539	64102	4.11612520338617	6.67800116141663e-133	FALSE	1.22963046199236e-130
CHEMBL1751	DIGOXIN	EFO_0001359	type I diabetes mellitus	1932	5458	524	64102	4.31713019107562	8.28628578257037e-133	FALSE	1.52198969429612e-130
CHEMBL223360	LINIFANIB	Orphanet_84	Fanconi anemia	3168	3761	568	64102	3.95058791861511	9.01315764357705e-133	FALSE	1.65141077269539e-130
CHEMBL2017974	BUPARLISIB	EFO_0004211	Hypertriglyceridemia	2439	3627	479	64102	4.54248285210012	1.53561819031348e-132	FALSE	2.80666373921703e-130
CHEMBL554	LAPATINIB	EFO_0003758	autism	1865	5501	515	64102	4.38024119380596	1.57053574856401e-132	FALSE	2.86343010373937e-130
CHEMBL2103882	TIVANTINIB	EFO_0000537	hypertension	1591	6014	492	64102	4.62009231385583	1.87355018281243e-132	FALSE	3.40751939499011e-130
CHEMBL2028663	DABRAFENIB	EFO_0003758	autism	2117	5501	555	64102	4.09770215730733	1.91161682911903e-132	FALSE	3.46825248911437e-130
CHEMBL521851	PICTILISIB	EFO_0000685	rheumatoid arthritis	3076	3417	528	64102	4.16990611801657	2.28772889432046e-132	FALSE	4.14051030739146e-130
CHEMBL1171837	PONATINIB	EFO_0001073	obesity	1865	7209	597	64102	3.96117693683781	4.6276217614128e-132	FALSE	8.35505286631721e-130
CHEMBL255863	NILOTINIB	EFO_0000289	bipolar disorder	2045	5835	561	64102	4.07026934727587	5.61464935391127e-132	FALSE	1.01125013424026e-129
CHEMBL552212	LEXIBULIN	EFO_0003885	multiple sclerosis	1991	4889	501	64102	4.42304588844303	5.75315479502842e-132	FALSE	1.03368729192514e-129
CHEMBL408513	BELINOSTAT	EFO_0002508	Parkinson's disease	3180	3371	533	64102	4.12102721516774	9.36102402006314e-132	FALSE	1.67786180533523e-129
CHEMBL1879463	DACTOLISIB	EFO_0002614	insulin resistance	3807	2330	478	64102	4.53092891337762	1.14498472184023e-131	FALSE	2.04731545263022e-129
CHEMBL554	LAPATINIB	EFO_0003885	multiple sclerosis	1865	4889	482	64102	4.57318688185344	1.19483355290723e-131	FALSE	2.13131307195868e-129
CHEMBL1078983	AZD-2014	EFO_0003885	multiple sclerosis	2110	4889	517	64102	4.27721828684093	3.22366191615125e-131	FALSE	5.73649478388497e-129
CHEMBL2103875	TRAMETINIB	EFO_0000692	schizophrenia	2703	5048	610	64102	3.74017378199008	3.52890357580405e-131	FALSE	6.2646480823574e-129
CHEMBL178	DAUNORUBICIN	EFO_0001073	obesity	1724	7209	567	64102	4.11252252961005	5.23030962495347e-131	FALSE	9.26289082863179e-129
CHEMBL1241855	RIGOSERTIB	EFO_0001073	obesity	1885	7209	599	64102	3.91876329981885	6.84388657187116e-131	FALSE	1.20916810253738e-128
CHEMBL272980	MOCETINOSTAT	EFO_0000249	Alzheimers disease	2992	3757	546	64102	4.02497677023813	6.92841360306726e-131	FALSE	1.22119461143849e-128
CHEMBL552212	LEXIBULIN	EFO_0000289	bipolar disorder	1991	5835	550	64102	4.10406586059993	1.02654936752359e-130	FALSE	1.80509705727696e-128
CHEMBL1078983	AZD-2014	EFO_0003758	autism	2110	5501	551	64102	4.07293794254583	1.14534709424886e-130	FALSE	2.00923123235784e-128
CHEMBL189963	PALBOCICLIB	EFO_0003885	multiple sclerosis	2222	4889	532	64102	4.15603584360515	1.16621280517959e-130	FALSE	2.04100993415924e-128
CHEMBL272980	MOCETINOSTAT	EFO_0000685	rheumatoid arthritis	2992	3417	517	64102	4.19276972024701	1.18454935509322e-130	FALSE	2.06822317399276e-128
CHEMBL603469	LESTAURTINIB	EFO_0000289	bipolar disorder	1691	5835	499	64102	4.47761457510257	1.22909089311033e-130	FALSE	2.14095515782281e-128
CHEMBL1241855	RIGOSERTIB	EFO_0000537	hypertension	1885	6014	541	64102	4.17352076486975	1.37075603196933e-130	FALSE	2.38213000825021e-128
CHEMBL1908394	GSK-461364	EFO_0000692	schizophrenia	2431	5048	571	64102	3.92200040275797	1.89299784106291e-130	FALSE	3.28200712140358e-128
CHEMBL1231160	PEVONEDISTAT	EFO_0000378	coronary artery disease	2455	3553	472	64102	4.52433297743914	2.65149272842556e-130	FALSE	4.58634074388855e-128
CHEMBL1231160	PEVONEDISTAT	EFO_0000692	schizophrenia	2455	5048	574	64102	3.89979156174838	3.14573293370852e-130	FALSE	5.42858400804282e-128
CHEMBL603469	LESTAURTINIB	EFO_0001073	obesity	1691	7209	559	64102	4.14089463624125	3.35745769487499e-130	FALSE	5.78051388046865e-128
CHEMBL2017974	BUPARLISIB	EFO_0003761	unipolar depression	2439	4304	522	64102	4.16731954624552	7.10080115208011e-130	FALSE	1.21971053122709e-127
CHEMBL428690	ALVOCIDIB	EFO_0002614	insulin resistance	4118	2330	496	64102	4.34179462279662	8.49740525354039e-130	FALSE	1.4562354661408e-127
CHEMBL14762	SELICICLIB	EFO_0000537	hypertension	1650	6014	498	64102	4.46204409115704	2.00137269653492e-129	FALSE	3.42193227987036e-127
CHEMBL865	VALDECOXIB	EFO_0001073	obesity	1757	7209	571	64102	4.0406439135194	2.17680645547191e-129	FALSE	3.71333156386881e-127
CHEMBL2103875	TRAMETINIB	EFO_0000195	metabolic syndrome	2703	3177	467	64102	4.52226905896122	2.38543064873235e-129	FALSE	4.05988259837578e-127
CHEMBL255863	NILOTINIB	HP_0003124	hypercholesterolemia	2045	4983	510	64102	4.27719660350272	2.47467423680814e-129	FALSE	4.2021327629828e-127
CHEMBL2103847	TOSEDOSTAT	EFO_0000692	schizophrenia	2502	5048	579	64102	3.84936732754129	2.64838789217863e-129	FALSE	4.48684072007112e-127
CHEMBL939	GEFITINIB	EFO_0003885	multiple sclerosis	2112	4889	514	64102	4.23584101712641	3.77654671739131e-129	FALSE	6.38356831808706e-127
CHEMBL272980	MOCETINOSTAT	EFO_0000378	coronary artery disease	2992	3553	526	64102	4.09279617416498	4.31895597593356e-129	FALSE	7.28382109532158e-127
CHEMBL1079175	MK-2206	EFO_0000195	metabolic syndrome	2937	3177	488	64102	4.33311807319277	1.23169669813999e-128	FALSE	2.07251821962535e-126
CHEMBL554	LAPATINIB	EFO_0000537	hypertension	1865	6014	534	64102	4.15540762764459	2.20193463030272e-128	FALSE	3.69670948510437e-126
CHEMBL554	LAPATINIB	EFO_0001359	type I diabetes mellitus	1865	5458	506	64102	4.30713556802021	3.55946971047319e-128	FALSE	5.96231263805109e-126
CHEMBL601719	CRIZOTINIB	EFO_0003761	unipolar depression	2617	4304	541	64102	3.99744458534486	4.07057295203908e-128	FALSE	6.80308256545181e-126
CHEMBL521851	PICTILISIB	EFO_0000195	metabolic syndrome	3076	3177	500	64102	4.23051623818782	4.32260177597635e-128	FALSE	7.20805988283876e-126
CHEMBL483254	PANOBINOSTAT	HP_0003124	hypercholesterolemia	2060	4983	510	64102	4.23472382172454	5.85880283706356e-128	FALSE	9.74781310592604e-126
CHEMBL939	GEFITINIB	HP_0003124	hypercholesterolemia	2112	4983	517	64102	4.17503987367561	1.23837668743579e-127	FALSE	2.05578841367277e-125
CHEMBL572878	TOZASERTIB	EFO_0000195	metabolic syndrome	2870	3177	480	64102	4.35873400293639	1.58819209779315e-127	FALSE	2.63062041555224e-125
CHEMBL502835	NINTEDANIB	EFO_0003761	unipolar depression	2163	4304	483	64102	4.37277718177279	3.08616698244789e-127	FALSE	5.10042362878721e-125
CHEMBL2103875	TRAMETINIB	EFO_0000249	Alzheimers disease	2703	3757	509	64102	4.15348104890168	3.5192606032179e-127	FALSE	5.80326073470632e-125
CHEMBL865	VALDECOXIB	EFO_0003758	autism	1757	5501	489	64102	4.4113945580089	4.18077330218793e-127	FALSE	6.87880893323404e-125
CHEMBL2103847	TOSEDOSTAT	EFO_0003761	unipolar depression	2502	4304	525	64102	4.06314131570286	6.21384360241885e-127	FALSE	1.02012890379976e-124
CHEMBL217092	SARACATINIB	EFO_0003761	unipolar depression	2438	4304	517	64102	4.11311799274548	7.29379060286673e-127	FALSE	1.1947808646484e-124
CHEMBL27759	ENTINOSTAT	EFO_0000673	prostate adenocarcinoma	2971	3249	494	64102	4.2256957213711	1.61837171286948e-126	FALSE	2.64518222364492e-124
CHEMBL98	VORINOSTAT	EFO_0000253	amyotrophic lateral sclerosis	4984	2437	561	64102	3.87038449271566	1.76701950615056e-126	FALSE	2.88179521876709e-124
CHEMBL2103875	TRAMETINIB	EFO_0000378	coronary artery disease	2703	3553	492	64102	4.24082262201664	2.39021287525041e-126	FALSE	3.88959970192888e-124
CHEMBL217092	SARACATINIB	EFO_0000692	schizophrenia	2438	5048	565	64102	3.84789345621756	2.48652074196625e-126	FALSE	4.0374676511511e-124
CHEMBL1078983	AZD-2014	HP_0003124	hypercholesterolemia	2110	4983	514	64102	4.14537599154936	5.93926787828814e-126	FALSE	9.62278106786837e-124
CHEMBL408513	BELINOSTAT	EFO_0000195	metabolic syndrome	3180	3177	506	64102	4.12672473067605	6.36269756168897e-126	FALSE	1.02863610580638e-123
CHEMBL1241855	RIGOSERTIB	EFO_0000289	bipolar disorder	1885	5835	524	64102	4.12541258068029	1.43049104690982e-125	FALSE	2.30759974208573e-123
CHEMBL2103847	TOSEDOSTAT	EFO_0004211	Hypertriglyceridemia	2502	3627	475	64102	4.3451707591745	1.64796108253797e-125	FALSE	2.65264538242364e-123
CHEMBL939	GEFITINIB	EFO_0004211	Hypertriglyceridemia	2112	3627	432	64102	4.73176060037137	1.69950094034285e-125	FALSE	2.7296854389208e-123
CHEMBL1614701	SELUMETINIB	EFO_0000384	Crohn's disease	3317	3430	541	64102	3.90553194320363	1.84450469033283e-125	FALSE	2.95618726881528e-123
CHEMBL483254	PANOBINOSTAT	EFO_0004211	Hypertriglyceridemia	2060	3627	426	64102	4.79205820668087	1.97117726075883e-125	FALSE	3.15239673781485e-123
CHEMBL98	VORINOSTAT	EFO_0001365	age-related macular degeneration	4984	2123	515	64102	4.1215298767239	2.20244819847781e-125	FALSE	3.5146810444741e-123
CHEMBL1229517	VEMURAFENIB	EFO_0000249	Alzheimers disease	2910	3757	528	64102	3.97901126918745	2.90212760569009e-125	FALSE	4.62129568627109e-123
CHEMBL2028663	DABRAFENIB	EFO_0000289	bipolar disorder	2117	5835	561	64102	3.87716668048917	6.2945270914678e-125	FALSE	1.00018283259608e-122
CHEMBL1489	AZACITIDINE	EFO_0003885	multiple sclerosis	2070	4889	501	64102	4.19469863444888	9.36609757908447e-125	FALSE	1.4850668180683e-122
CHEMBL1976040	AZD-1775	EFO_0000378	coronary artery disease	2693	3553	488	64102	4.21272734928419	1.72386203619454e-124	FALSE	2.72748789756537e-122
CHEMBL27759	ENTINOSTAT	EFO_0000384	Crohn's disease	2971	3430	506	64102	4.08622056440677	1.88029695401952e-124	FALSE	2.96866883985145e-122
CHEMBL98	VORINOSTAT	EFO_0003869	breast neoplasm	4984	2205	525	64102	4.02553627321995	2.32544756733658e-124	FALSE	3.66369080115097e-122
CHEMBL217092	SARACATINIB	EFO_0004211	Hypertriglyceridemia	2438	3627	466	64102	4.37336498119645	3.64976815553582e-124	FALSE	5.73794588943932e-122
CHEMBL1976040	AZD-1775	EFO_0000195	metabolic syndrome	2693	3177	458	64102	4.42307829066032	4.1520801796024e-124	FALSE	6.51385009994494e-122
CHEMBL865	VALDECOXIB	EFO_0000289	bipolar disorder	1757	5835	500	64102	4.2506506667722	4.98721411715869e-124	FALSE	7.80751526505824e-122
CHEMBL1976040	AZD-1775	EFO_0003761	unipolar depression	2693	4304	543	64102	3.87132733046673	7.49236239796443e-124	FALSE	1.17046474050726e-121
CHEMBL603469	LESTAURTINIB	EFO_0003758	autism	1691	5501	473	64102	4.43193963775801	9.66387251861328e-124	FALSE	1.50652869799096e-121
CHEMBL865	VALDECOXIB	EFO_0001359	type I diabetes mellitus	1757	5458	481	64102	4.34502274166619	2.72016628464198e-123	FALSE	4.23165490884399e-121
CHEMBL255863	NILOTINIB	EFO_0003885	multiple sclerosis	2045	4889	495	64102	4.19092154918042	3.14147663788061e-123	FALSE	4.87684673460106e-121
CHEMBL180022	NERATINIB	EFO_0000384	Crohn's disease	3106	3430	517	64102	3.9816520046098	3.53292932326891e-123	FALSE	5.47309019693464e-121
CHEMBL408513	BELINOSTAT	EFO_0000673	prostate adenocarcinoma	3180	3249	508	64102	4.03543799716983	3.55069214279654e-123	FALSE	5.48914813450453e-121
CHEMBL408513	BELINOSTAT	EFO_0000384	Crohn's disease	3180	3430	524	64102	3.93871540491864	4.07360282664693e-123	FALSE	6.28444278069305e-121
CHEMBL1241855	RIGOSERTIB	EFO_0001359	type I diabetes mellitus	1885	5458	501	64102	4.18156855451805	4.89723903421381e-123	FALSE	7.53941125588871e-121
CHEMBL445813	AT-7519	EFO_0002614	insulin resistance	3979	2330	476	64102	4.27053068338491	6.06549940658361e-123	FALSE	9.31864147961774e-121
CHEMBL1614701	SELUMETINIB	EFO_0002508	Parkinson's disease	3317	3371	531	64102	3.88877950890397	9.63270624601513e-123	FALSE	1.47684910534205e-120
CHEMBL572878	TOZASERTIB	EFO_0000685	rheumatoid arthritis	2870	3417	492	64102	4.12417228165246	1.36486171483788e-122	FALSE	2.08823842370195e-120
CHEMBL408513	BELINOSTAT	Orphanet_84	Fanconi anemia	3180	3761	551	64102	3.76827471572379	4.61753406883266e-122	FALSE	7.05029044398616e-120
CHEMBL325041	BORTEZOMIB	EFO_0000195	metabolic syndrome	2931	3177	477	64102	4.20925531578816	4.8158823148675e-122	FALSE	7.33803998305427e-120
CHEMBL1229517	VEMURAFENIB	EFO_0000195	metabolic syndrome	2910	3177	475	64102	4.22255502075139	5.27371091170077e-122	FALSE	8.01917455333516e-120
CHEMBL483254	PANOBINOSTAT	EFO_0000692	schizophrenia	2060	5048	504	64102	4.09866450101427	5.60186808302793e-122	FALSE	8.50074889777275e-120
CHEMBL601719	CRIZOTINIB	EFO_0000378	coronary artery disease	2617	3553	476	64102	4.22008672619845	6.60989857250059e-122	FALSE	1.00099494606614e-119
CHEMBL189963	PALBOCICLIB	HP_0003124	hypercholesterolemia	2222	4983	523	64102	3.96327744882926	9.51176142843076e-122	FALSE	1.43751579795663e-119
CHEMBL502835	NINTEDANIB	EFO_0000692	schizophrenia	2163	5048	518	64102	3.99081618275693	1.76504948380587e-121	FALSE	2.66210359645964e-119
CHEMBL2103882	TIVANTINIB	EFO_0003758	autism	1591	5501	453	64102	4.53120176027927	1.87532530889347e-121	FALSE	2.82268792183448e-119
CHEMBL1489	AZACITIDINE	EFO_0004211	Hypertriglyceridemia	2070	3627	420	64102	4.6683732198597	1.29993026389474e-120	FALSE	1.95265840551233e-118
CHEMBL1171837	PONATINIB	EFO_0003758	autism	1865	5501	496	64102	4.14306376298876	1.47023082752887e-120	FALSE	2.20400966781374e-118
CHEMBL1614701	SELUMETINIB	EFO_0000673	prostate adenocarcinoma	3317	3249	516	64102	3.9130384982363	1.68133778597629e-120	FALSE	2.51539658081393e-118
CHEMBL223360	LINIFANIB	EFO_0000673	prostate adenocarcinoma	3168	3249	502	64102	3.98845743165493	3.24341708038762e-120	FALSE	4.84261095473166e-118
CHEMBL521851	PICTILISIB	Orphanet_84	Fanconi anemia	3076	3761	537	64102	3.79208201809837	3.72960181810234e-120	FALSE	5.55733138378081e-118
CHEMBL521851	PICTILISIB	EFO_0000384	Crohn's disease	3076	3430	509	64102	3.94432836496676	4.07482361717973e-120	FALSE	6.05956485997639e-118
CHEMBL2017974	BUPARLISIB	EFO_0000692	schizophrenia	2439	5048	554	64102	3.73826354246694	7.10519368501541e-120	FALSE	1.05448179479314e-117
CHEMBL1976040	AZD-1775	EFO_0000685	rheumatoid arthritis	2693	3417	470	64102	4.19409496280726	8.57138605970403e-120	FALSE	1.26954032447173e-117
CHEMBL1751	DIGOXIN	EFO_0003885	multiple sclerosis	1932	4889	473	64102	4.2398951616833	1.48330819127851e-119	FALSE	2.19260725764585e-117
CHEMBL189963	PALBOCICLIB	EFO_0000692	schizophrenia	2222	5048	523	64102	3.90198899594348	1.84236439989884e-119	FALSE	2.71794533388654e-117
CHEMBL180022	NERATINIB	EFO_0002508	Parkinson's disease	3106	3371	505	64102	3.93798627935298	4.70826399090868e-119	FALSE	6.93207796518608e-117
CHEMBL521686	OLAPARIB	EFO_0000289	bipolar disorder	1599	5835	465	64102	4.36265372402594	6.01983263766233e-119	FALSE	8.84557783916304e-117
CHEMBL27759	ENTINOSTAT	EFO_0002508	Parkinson's disease	2971	3371	492	64102	4.01561129372063	6.11185596414902e-119	FALSE	8.96304885019127e-117
CHEMBL325041	BORTEZOMIB	EFO_0000384	Crohn's disease	2931	3430	493	64102	4.00941332558613	6.40778169557967e-119	FALSE	9.37848995503923e-117
CHEMBL572878	TOZASERTIB	EFO_0000249	Alzheimers disease	2870	3757	513	64102	3.89066273754198	7.7356757991778e-119	FALSE	1.1299720918858e-116
CHEMBL507361	PD-0325901	EFO_0003869	breast neoplasm	4217	2205	469	64102	4.19139339036168	1.95890529400666e-118	FALSE	2.85020720277969e-116
CHEMBL178	DAUNORUBICIN	EFO_0001359	type I diabetes mellitus	1724	5458	468	64102	4.2852467330684	2.12797562484555e-118	FALSE	3.09014542547287e-116
CHEMBL1614701	SELUMETINIB	EFO_0002614	insulin resistance	3317	2330	424	64102	4.52726663079108	2.43844371561133e-118	FALSE	3.53407648275271e-116
CHEMBL483254	PANOBINOSTAT	EFO_0003885	multiple sclerosis	2060	4889	489	64102	4.07780382611664	3.21109143631927e-118	FALSE	4.64481559516709e-116
CHEMBL1171837	PONATINIB	EFO_0003885	multiple sclerosis	1865	4889	461	64102	4.2866256219994	4.59159300476777e-118	FALSE	6.62877741087144e-116
CHEMBL1079175	MK-2206	EFO_0002508	Parkinson's disease	2937	3371	487	64102	4.01687718364735	6.99406595793264e-118	FALSE	1.00775662991921e-115
CHEMBL554	LAPATINIB	EFO_0000289	bipolar disorder	1865	5835	508	64102	3.99957123121331	7.67224160241185e-118	FALSE	1.10333079090498e-115
CHEMBL1229517	VEMURAFENIB	EFO_0000685	rheumatoid arthritis	2910	3417	488	64102	4.0078748690616	8.964263000524e-118	FALSE	1.28664049507521e-115
CHEMBL1489	AZACITIDINE	EFO_0000692	schizophrenia	2070	5048	498	64102	4.00233014507304	1.8790517028189e-117	FALSE	2.69179597698218e-115
CHEMBL552212	LEXIBULIN	HP_0003124	hypercholesterolemia	1991	4983	483	64102	4.10058065398469	2.1922235123179e-117	FALSE	3.1343727501262e-115
CHEMBL27759	ENTINOSTAT	EFO_0000195	metabolic syndrome	2971	3177	473	64102	4.0913262966119	2.64923453465843e-117	FALSE	3.78050862777555e-115
CHEMBL272980	MOCETINOSTAT	EFO_0002508	Parkinson's disease	2992	3371	491	64102	3.96934777821331	3.90754903906159e-117	FALSE	5.56544484536593e-115
CHEMBL2017974	BUPARLISIB	EFO_0000249	Alzheimers disease	2439	3757	464	64102	4.16426949945852	4.19757028195692e-117	FALSE	5.967063271506e-115
CHEMBL189963	PALBOCICLIB	EFO_0003761	unipolar depression	2222	4304	474	64102	4.10997122287843	6.59551331162955e-117	FALSE	9.35793623880441e-115
CHEMBL2103875	TRAMETINIB	EFO_0000685	rheumatoid arthritis	2703	3417	466	64102	4.12581095895601	1.06239691961561e-116	FALSE	1.50448785152817e-114
CHEMBL180022	NERATINIB	Orphanet_84	Fanconi anemia	3106	3761	534	64102	3.71701429041368	1.17412536475811e-116	FALSE	1.6595423369881e-114
CHEMBL521686	OLAPARIB	EFO_0000537	hypertension	1599	6014	469	64102	4.26336961537223	1.25272769768405e-116	FALSE	1.7672748822556e-114
CHEMBL325041	BORTEZOMIB	EFO_0000685	rheumatoid arthritis	2931	3417	488	64102	3.97201392923462	1.4913806281361e-116	FALSE	2.09996014252067e-114
CHEMBL1489	AZACITIDINE	EFO_0003761	unipolar depression	2070	4304	454	64102	4.24554371323484	2.38698873198252e-116	FALSE	3.35466853895384e-114
CHEMBL554	LAPATINIB	HP_0003124	hypercholesterolemia	1865	4983	463	64102	4.21693648211363	2.74363694942018e-116	FALSE	3.84861209511767e-114
CHEMBL1289494	TIVOZANIB	EFO_0000692	schizophrenia	2141	5048	506	64102	3.91260303153929	3.50771912593292e-116	FALSE	4.91113769320476e-114
CHEMBL217092	SARACATINIB	EFO_0000378	coronary artery disease	2438	3553	448	64102	4.24563481916084	4.85233557615989e-116	FALSE	6.78093336024378e-114
CHEMBL1421	DASATINIB	EFO_0000253	amyotrophic lateral sclerosis	4246	2437	495	64102	3.93554029181316	5.72149172041594e-116	FALSE	7.98051302844859e-114
CHEMBL2028663	DABRAFENIB	EFO_0003885	multiple sclerosis	2117	4889	493	64102	3.97703214348895	7.96962809749506e-116	FALSE	1.10954268850773e-113
CHEMBL601719	CRIZOTINIB	EFO_0002508	Parkinson's disease	2617	3371	452	64102	4.18869140307891	1.91501344442605e-115	FALSE	2.66111559257744e-113
CHEMBL1171837	PONATINIB	EFO_0000289	bipolar disorder	1865	5835	504	64102	3.95321138792664	1.92918290400823e-115	FALSE	2.67579471760618e-113
CHEMBL1078983	AZD-2014	EFO_0004211	Hypertriglyceridemia	2110	3627	416	64102	4.49529488922003	5.20314474619613e-115	FALSE	7.20334619200529e-113
CHEMBL1079175	MK-2206	EFO_0000384	Crohn's disease	2937	3430	487	64102	3.93242592467642	5.65204273721965e-115	FALSE	7.81023894442056e-113
CHEMBL272980	MOCETINOSTAT	EFO_0000673	prostate adenocarcinoma	2992	3249	477	64102	3.99147233064052	7.09875927600924e-115	FALSE	9.79114186015363e-113
CHEMBL1229517	VEMURAFENIB	EFO_0002508	Parkinson's disease	2910	3371	479	64102	3.9720799061327	1.28929458382055e-114	FALSE	1.77499266405202e-112
CHEMBL1079175	MK-2206	Orphanet_84	Fanconi anemia	2937	3761	513	64102	3.77395383777237	1.40687569612649e-114	FALSE	1.93328168576048e-112
CHEMBL552212	LEXIBULIN	EFO_0004211	Hypertriglyceridemia	1991	3627	402	64102	4.61921069043677	1.56231813284962e-114	FALSE	2.14291713582452e-112
CHEMBL1287853	FEDRATINIB	EFO_0002614	insulin resistance	3684	2330	443	64102	4.23960485080682	1.66038940569965e-114	FALSE	2.2732323957554e-112
CHEMBL502835	NINTEDANIB	EFO_0004211	Hypertriglyceridemia	2163	3627	421	64102	4.42725909109647	1.82986849872287e-114	FALSE	2.50065178540941e-112
CHEMBL2103847	TOSEDOSTAT	EFO_0000378	coronary artery disease	2502	3553	452	64102	4.15929729196119	2.2228123811177e-114	FALSE	3.03205501361836e-112
CHEMBL521851	PICTILISIB	EFO_0002508	Parkinson's disease	3076	3371	494	64102	3.86704045205619	3.27683534479137e-114	FALSE	4.46160672954575e-112
CHEMBL2103847	TOSEDOSTAT	EFO_0000195	metabolic syndrome	2502	3177	424	64102	4.36134721657059	6.71573804281179e-114	FALSE	9.12713079609613e-112
CHEMBL272980	MOCETINOSTAT	EFO_0000384	Crohn's disease	2992	3430	490	64102	3.87495289923195	1.26404004296066e-113	FALSE	1.71477315151546e-111
CHEMBL554	LAPATINIB	EFO_0000692	schizophrenia	1865	5048	462	64102	4.13963414005382	1.30254461354012e-113	FALSE	1.76378326729461e-111
CHEMBL1230609	FORETINIB	EFO_0000692	schizophrenia	2302	5048	524	64102	3.73075147840832	1.56689439606376e-113	FALSE	2.11787611402388e-111
CHEMBL180022	NERATINIB	EFO_0000673	prostate adenocarcinoma	3106	3249	485	64102	3.89851853525075	1.93508251899522e-113	FALSE	2.61077815130982e-111
CHEMBL27759	ENTINOSTAT	Orphanet_84	Fanconi anemia	2971	3761	514	64102	3.72959595682189	3.8818391821395e-113	FALSE	5.22780175155466e-111
CHEMBL2103882	TIVANTINIB	EFO_0001359	type I diabetes mellitus	1591	5458	438	64102	4.35047710997701	6.00348895756071e-113	FALSE	8.07045105246001e-111
CHEMBL1976040	AZD-1775	EFO_0000673	prostate adenocarcinoma	2693	3249	446	64102	4.14990120001024	6.03935461990064e-113	FALSE	8.10398389818674e-111
CHEMBL288441	BOSUTINIB	EFO_0001073	obesity	1594	7209	511	64102	3.93183537007576	6.28670954088892e-113	FALSE	8.42067295093253e-111
CHEMBL521686	OLAPARIB	EFO_0003758	autism	1599	5501	441	64102	4.32328994216291	7.65157065411483e-113	FALSE	1.02303567637584e-110
CHEMBL325041	BORTEZOMIB	EFO_0002508	Parkinson's disease	2931	3371	478	64102	3.92543167545551	7.92091524279567e-113	FALSE	1.05714301365405e-110
CHEMBL178	DAUNORUBICIN	EFO_0003885	multiple sclerosis	1724	4889	432	64102	4.34516329363543	1.24719909297047e-112	FALSE	1.6615513230498e-110
CHEMBL1230609	FORETINIB	EFO_0004211	Hypertriglyceridemia	2302	3627	433	64102	4.25081073041107	1.68403284726248e-112	FALSE	2.23949206865792e-110
CHEMBL521686	OLAPARIB	EFO_0003885	multiple sclerosis	1599	4889	413	64102	4.51430639434091	2.98681161922905e-112	FALSE	3.9648722040231e-110
CHEMBL2017974	BUPARLISIB	EFO_0000378	coronary artery disease	2439	3553	442	64102	4.1655704672024	3.15050017862851e-112	FALSE	4.17469403134158e-110
CHEMBL2103882	TIVANTINIB	EFO_0001073	obesity	1591	7209	509	64102	3.9189756850403	4.28471812836005e-112	FALSE	5.6675135243308e-110
CHEMBL1079175	MK-2206	EFO_0000685	rheumatoid arthritis	2937	3417	481	64102	3.88423196481897	4.78894735367673e-112	FALSE	6.32319997116694e-110
CHEMBL300138	ENZASTAURIN	EFO_0000537	hypertension	1294	6014	407	64102	4.68092138990811	6.79201784298929e-112	FALSE	8.95207254065755e-110
CHEMBL1976040	AZD-1775	EFO_0000384	Crohn's disease	2693	3430	458	64102	4.02922438897987	8.32918984360366e-112	FALSE	1.09586441905073e-109
CHEMBL178	DAUNORUBICIN	EFO_0003758	autism	1724	5501	459	64102	4.12626851976376	1.5622160924808e-111	FALSE	2.05175655119536e-109
CHEMBL601719	CRIZOTINIB	EFO_0000685	rheumatoid arthritis	2617	3417	449	64102	4.08316067594897	1.79844637940487e-111	FALSE	2.35783946261021e-109
CHEMBL217092	SARACATINIB	EFO_0000195	metabolic syndrome	2438	3177	414	64102	4.36027466216182	2.15324033156521e-111	FALSE	2.81801056091352e-109
CHEMBL572878	TOZASERTIB	EFO_0000384	Crohn's disease	2870	3430	474	64102	3.90014669235411	4.35361747047636e-111	FALSE	5.68767930275877e-109
CHEMBL1241855	RIGOSERTIB	EFO_0003885	multiple sclerosis	1885	4889	452	64102	4.10758154499021	1.1398083927451e-110	FALSE	1.48645837932602e-108
CHEMBL521686	OLAPARIB	EFO_0001073	obesity	1599	7209	508	64102	3.87691819388539	1.45858287152499e-110	FALSE	1.89884459616688e-108
CHEMBL521686	OLAPARIB	EFO_0001359	type I diabetes mellitus	1599	5458	435	64102	4.27651545669245	3.20218492034409e-110	FALSE	4.15416314710023e-108
CHEMBL1230609	FORETINIB	HP_0003124	hypercholesterolemia	2302	4983	514	64102	3.68746869785646	4.7242239147054e-110	FALSE	6.11799364032659e-108
CHEMBL1908394	GSK-461364	EFO_0003761	unipolar depression	2431	4304	488	64102	3.80809059807442	5.02759764726357e-110	FALSE	6.49952758563054e-108
CHEMBL1078983	AZD-2014	EFO_0000692	schizophrenia	2110	5048	491	64102	3.8226791696392	6.20597407115699e-110	FALSE	8.00894445130791e-108
CHEMBL255863	NILOTINIB	EFO_0004211	Hypertriglyceridemia	2045	3627	401	64102	4.44801756399721	6.39023571234368e-110	FALSE	8.23242085129276e-108
CHEMBL603469	LESTAURTINIB	EFO_0001359	type I diabetes mellitus	1691	5458	449	64102	4.14295289266915	8.3940902593152e-110	FALSE	1.07952074123481e-107
CHEMBL521851	PICTILISIB	EFO_0000673	prostate adenocarcinoma	3076	3249	476	64102	3.84599316767584	9.70965187871864e-110	FALSE	1.24654795442961e-107
CHEMBL601719	CRIZOTINIB	EFO_0000195	metabolic syndrome	2617	3177	428	64102	4.17747063512078	1.31349619631897e-109	FALSE	1.68338489201813e-107
CHEMBL288441	BOSUTINIB	EFO_0003758	autism	1594	5501	435	64102	4.25571066874789	1.4762048582556e-109	FALSE	1.88865140529063e-107
CHEMBL1171837	PONATINIB	EFO_0001359	type I diabetes mellitus	1865	5458	475	64102	3.92665143789087	4.09777973110835e-109	FALSE	5.23366170304466e-107
CHEMBL1289494	TIVOZANIB	HP_0003124	hypercholesterolemia	2141	4983	490	64102	3.79556349829845	5.92709152416983e-109	FALSE	7.55704169331653e-107
CHEMBL1078983	AZD-2014	EFO_0003761	unipolar depression	2110	4304	447	64102	4.05141617949216	6.49684576716209e-109	FALSE	8.26926998545905e-107
CHEMBL507361	PD-0325901	EFO_0001645	coronary heart disease	4217	2120	443	64102	4.07429241472897	7.94119513296459e-109	FALSE	1.00903490555075e-106
CHEMBL2103847	TOSEDOSTAT	EFO_0000249	Alzheimers disease	2502	3757	457	64102	3.94804885594582	1.06557991560265e-108	FALSE	1.35164713909905e-106
CHEMBL1230609	FORETINIB	EFO_0003761	unipolar depression	2302	4304	470	64102	3.87894408732761	1.38521289064209e-108	FALSE	1.75409082849994e-106
CHEMBL1976040	AZD-1775	EFO_0002508	Parkinson's disease	2693	3371	448	64102	3.99283348350924	1.81314961853531e-108	FALSE	2.29207440278386e-106
CHEMBL288441	BOSUTINIB	EFO_0000537	hypertension	1594	6014	455	64102	4.09256426155907	1.81867104872043e-108	FALSE	2.29514430561734e-106
CHEMBL608533	MIDOSTAURIN	EFO_0000537	hypertension	1525	6014	443	64102	4.18962264521086	1.92274457183161e-108	FALSE	2.42236436252571e-106
CHEMBL1289494	TIVOZANIB	EFO_0003761	unipolar depression	2141	4304	450	64102	4.01229175064355	2.09883912900977e-108	FALSE	2.63973487403678e-106
CHEMBL1751	DIGOXIN	EFO_0000692	schizophrenia	1932	5048	463	64102	3.95868037028902	2.56013114879665e-108	FALSE	3.21445908454239e-106
CHEMBL1229517	VEMURAFENIB	EFO_0000384	Crohn's disease	2910	3430	473	64102	3.82252688593687	2.99797305308046e-108	FALSE	3.7578478108756e-106
CHEMBL507361	PD-0325901	EFO_0000270	asthma	4217	2121	442	64102	4.05904950216653	3.83963778352023e-108	FALSE	4.80472717919256e-106
CHEMBL325041	BORTEZOMIB	EFO_0000673	prostate adenocarcinoma	2931	3249	460	64102	3.89688645943024	4.60268117383326e-108	FALSE	5.74986458761443e-106
CHEMBL428690	ALVOCIDIB	EFO_0000270	asthma	4118	2121	436	64102	4.09696239236031	4.85248116187621e-108	FALSE	6.05173722045418e-106
CHEMBL2103875	TRAMETINIB	EFO_0000384	Crohn's disease	2703	3430	452	64102	3.93920488385788	1.30003377619762e-107	FALSE	1.61589625398232e-105
CHEMBL223360	LINIFANIB	EFO_0002614	insulin resistance	3168	2330	397	64102	4.3728396934998	1.67578263599518e-107	FALSE	2.0794556940472e-105
CHEMBL1908394	GSK-461364	EFO_0000685	rheumatoid arthritis	2431	3417	424	64102	4.1416730545768	1.91448050168807e-107	FALSE	2.37168657141508e-105
CHEMBL2028663	DABRAFENIB	EFO_0004211	Hypertriglyceridemia	2117	3627	405	64102	4.31433712843745	2.00526819845399e-107	FALSE	2.48001544443797e-105
CHEMBL483254	PANOBINOSTAT	EFO_0000685	rheumatoid arthritis	2060	3417	386	64102	4.48910973917073	2.1763913239867e-107	FALSE	2.68717334769439e-105
CHEMBL2103882	TIVANTINIB	EFO_0000289	bipolar disorder	1591	5835	445	64102	4.11526357897675	3.02898810593677e-107	FALSE	3.73365552161192e-105
CHEMBL2103875	TRAMETINIB	Orphanet_84	Fanconi anemia	2703	3761	476	64102	3.78142083422145	3.07834124217008e-107	FALSE	3.78819754353617e-105
CHEMBL445813	AT-7519	EFO_0003869	breast neoplasm	3979	2205	436	64102	4.05935771133964	3.88485153902555e-107	FALSE	4.77277166313561e-105
CHEMBL507361	PD-0325901	EFO_0000253	amyotrophic lateral sclerosis	4217	2437	478	64102	3.78043764809947	4.11582173401338e-107	FALSE	5.0481744094622e-105
CHEMBL1879463	DACTOLISIB	EFO_0003869	breast neoplasm	3807	2205	425	64102	4.13100092286288	6.39740585350937e-107	FALSE	7.83365513794823e-105
CHEMBL2028663	DABRAFENIB	HP_0003124	hypercholesterolemia	2117	4983	483	64102	3.77553197925019	8.02816163719225e-107	FALSE	9.81432840671912e-105
CHEMBL1908394	GSK-461364	EFO_0000249	Alzheimers disease	2431	3757	446	64102	3.96036030355466	1.16080683216122e-106	FALSE	1.41673800954808e-104
CHEMBL483254	PANOBINOSTAT	EFO_0003761	unipolar depression	2060	4304	437	64102	4.05069015069403	1.30474644668346e-106	FALSE	1.58979819501061e-104
CHEMBL608533	MIDOSTAURIN	EFO_0003758	autism	1525	5501	419	64102	4.28602409893216	1.62838340660169e-106	FALSE	1.98088837191604e-104
CHEMBL1229517	VEMURAFENIB	Orphanet_84	Fanconi anemia	2910	3761	496	64102	3.64490961926734	1.80788217472296e-106	FALSE	2.19564479174006e-104
CHEMBL1289494	TIVOZANIB	EFO_0000249	Alzheimers disease	2141	3757	414	64102	4.20331035611319	2.01657248329001e-106	FALSE	2.44509413598914e-104
CHEMBL189963	PALBOCICLIB	EFO_0000378	coronary artery disease	2222	3553	410	64102	4.22843344007325	2.03994854061154e-106	FALSE	2.46940263386752e-104
CHEMBL445813	AT-7519	EFO_0000253	amyotrophic lateral sclerosis	3979	2437	461	64102	3.85623461413117	2.37176907698335e-106	FALSE	2.86640267683305e-104
CHEMBL1231160	PEVONEDISTAT	EFO_0000249	Alzheimers disease	2455	3757	448	64102	3.93542773174222	2.52979020065305e-106	FALSE	3.05240783478796e-104
CHEMBL502835	NINTEDANIB	EFO_0000685	rheumatoid arthritis	2163	3417	395	64102	4.35555820426599	2.72699164206302e-106	FALSE	3.28500673375465e-104
CHEMBL603469	LESTAURTINIB	EFO_0003885	multiple sclerosis	1691	4889	417	64102	4.24065598972136	3.66514539894385e-106	FALSE	4.40797592104746e-104
CHEMBL601719	CRIZOTINIB	EFO_0000384	Crohn's disease	2617	3430	441	64102	3.9662433234914	4.78012718943699e-106	FALSE	5.73963330246233e-104
CHEMBL1908394	GSK-461364	EFO_0000378	coronary artery disease	2431	3553	431	64102	4.04137747056749	5.55346452486771e-106	FALSE	6.65742867637817e-104
CHEMBL1231160	PEVONEDISTAT	EFO_0000685	rheumatoid arthritis	2455	3417	424	64102	4.09108096091072	5.64393859099243e-106	FALSE	6.75497521200956e-104
CHEMBL572878	TOZASERTIB	Orphanet_84	Fanconi anemia	2870	3761	491	64102	3.65784399235213	5.90629329709081e-106	FALSE	7.05759249775561e-104
CHEMBL1751	DIGOXIN	EFO_0003758	autism	1932	5501	482	64102	3.78468880730708	5.91863673589678e-106	FALSE	7.06097168789744e-104
CHEMBL1421	DASATINIB	EFO_0000270	asthma	4246	2121	440	64102	4.00092138010366	6.68422453234898e-106	FALSE	7.96152297629142e-104
CHEMBL288441	BOSUTINIB	EFO_0000289	bipolar disorder	1594	5835	443	64102	4.077132466798	1.03758126523954e-105	FALSE	1.23387368248557e-103
CHEMBL554	LAPATINIB	EFO_0004211	Hypertriglyceridemia	1865	3627	374	64102	4.54804991756664	2.27255464175125e-105	FALSE	2.69815867505843e-103
CHEMBL1908360	EVEROLIMUS	EFO_0000537	hypertension	1590	6014	449	64102	4.02708395060119	3.13594664514919e-105	FALSE	3.71729905436575e-103
CHEMBL552212	LEXIBULIN	EFO_0003761	unipolar depression	1991	4304	426	64102	4.08750053982923	3.75674830625516e-105	FALSE	4.44608465814457e-103
CHEMBL939	GEFITINIB	EFO_0000692	schizophrenia	2112	5048	483	64102	3.72936905238365	3.76936439691243e-105	FALSE	4.45391218268928e-103
CHEMBL180022	NERATINIB	EFO_0002614	insulin resistance	3106	2330	389	64102	4.35585313027978	4.10242908473541e-105	FALSE	4.83975755537029e-103
CHEMBL601719	CRIZOTINIB	EFO_0000673	prostate adenocarcinoma	2617	3249	426	64102	4.0402257074257	4.61430411153906e-105	FALSE	5.43499105709136e-103
CHEMBL408513	BELINOSTAT	EFO_0002614	insulin resistance	3180	2330	394	64102	4.30865393605189	4.62613361187283e-105	FALSE	5.44028913897026e-103
CHEMBL428690	ALVOCIDIB	EFO_0003869	breast neoplasm	4118	2205	441	64102	3.95847875271352	4.94693533536926e-105	FALSE	5.80834393292842e-103
CHEMBL1976040	AZD-1775	Orphanet_84	Fanconi anemia	2693	3761	471	64102	3.74478784266947	5.88806475764676e-105	FALSE	6.90243041613236e-103
CHEMBL572878	TOZASERTIB	EFO_0000673	prostate adenocarcinoma	2870	3249	449	64102	3.87034254999858	7.46566303120636e-105	FALSE	8.73800512982126e-103
CHEMBL1241855	RIGOSERTIB	HP_0003124	hypercholesterolemia	1885	4983	447	64102	3.9530289866129	9.65939576604904e-105	FALSE	1.12878025640893e-102
CHEMBL1289494	TIVOZANIB	EFO_0004211	Hypertriglyceridemia	2141	3627	403	64102	4.22434272478242	1.59374441901065e-104	FALSE	1.85949378321832e-102
CHEMBL1908360	EVEROLIMUS	EFO_0000289	bipolar disorder	1590	5835	440	64102	4.05088308271851	2.73694763223488e-104	FALSE	3.18830767739387e-102
CHEMBL1879463	DACTOLISIB	EFO_0000253	amyotrophic lateral sclerosis	3807	2437	446	64102	3.8860281427613	2.79684716768428e-104	FALSE	3.25297874730426e-102
CHEMBL1078983	AZD-2014	EFO_0000249	Alzheimers disease	2110	3757	407	64102	4.18344006512867	3.34692235309164e-104	FALSE	3.88667250721698e-102
CHEMBL1241855	RIGOSERTIB	EFO_0003761	unipolar depression	1885	4304	411	64102	4.17736595619994	3.9105966813462e-104	FALSE	4.53415354280148e-102
CHEMBL189963	PALBOCICLIB	EFO_0004211	Hypertriglyceridemia	2222	3627	411	64102	4.13970885884817	4.12867473491592e-104	FALSE	4.7795367972611e-102
CHEMBL939	GEFITINIB	EFO_0000249	Alzheimers disease	2112	3757	407	64102	4.17839262251077	4.59773150819892e-104	FALSE	5.31424714277104e-102
CHEMBL2103882	TIVANTINIB	EFO_0003885	multiple sclerosis	1591	4889	399	64102	4.32542050763486	5.73160386095231e-104	FALSE	6.61452044326541e-102
CHEMBL428690	ALVOCIDIB	EFO_0000253	amyotrophic lateral sclerosis	4118	2437	466	64102	3.75601106952299	6.28245112464001e-104	FALSE	7.23896406372534e-102
CHEMBL2103847	TOSEDOSTAT	EFO_0000685	rheumatoid arthritis	2502	3417	425	64102	4.00815201653938	9.21743400978013e-104	FALSE	1.06043362898564e-101
CHEMBL272980	MOCETINOSTAT	Orphanet_84	Fanconi anemia	2992	3761	499	64102	3.54932048441744	1.63692979705939e-103	FALSE	1.88031541162217e-101
CHEMBL554	LAPATINIB	EFO_0000378	coronary artery disease	1865	3553	367	64102	4.5406371780185	1.84200522622305e-103	FALSE	2.11261202182197e-101
CHEMBL1908360	EVEROLIMUS	EFO_0001073	obesity	1590	7209	494	64102	3.74483926873746	1.89129073139366e-103	FALSE	2.16579056671399e-101
CHEMBL1231160	PEVONEDISTAT	EFO_0000195	metabolic syndrome	2455	3177	403	64102	4.16796097091284	1.90344729190313e-103	FALSE	2.17635294754502e-101
CHEMBL939	GEFITINIB	EFO_0003761	unipolar depression	2112	4304	438	64102	3.93393672938572	2.39393489051914e-103	FALSE	2.7329529007842e-101
CHEMBL14762	SELICICLIB	EFO_0000289	bipolar disorder	1650	5835	448	64102	3.94845255896189	4.13464355517018e-103	FALSE	4.71292204318592e-101
CHEMBL255863	NILOTINIB	EFO_0000692	schizophrenia	2045	5048	470	64102	3.74625877854532	4.7483472694347e-103	FALSE	5.40415811546628e-101
CHEMBL325041	BORTEZOMIB	Orphanet_84	Fanconi anemia	2931	3761	492	64102	3.57265046449199	4.79083116683558e-103	FALSE	5.44415967434968e-101
CHEMBL14762	SELICICLIB	EFO_0003758	autism	1650	5501	433	64102	4.02876210026202	8.4311016216945e-103	FALSE	9.56620635837676e-101
CHEMBL217092	SARACATINIB	EFO_0000685	rheumatoid arthritis	2438	3417	417	64102	4.03473415786429	9.85283232834652e-103	FALSE	1.11622812660298e-100
CHEMBL445813	AT-7519	EFO_0000270	asthma	3979	2121	419	64102	4.03993719577575	1.10867476726848e-102	FALSE	1.25410382782253e-100
CHEMBL2017974	BUPARLISIB	EFO_0000685	rheumatoid arthritis	2439	3417	417	64102	4.03267128957695	1.13084881904692e-102	FALSE	1.2772395223345e-100
CHEMBL603469	LESTAURTINIB	EFO_0004211	Hypertriglyceridemia	1691	3627	350	64102	4.70929035703143	1.54534153394924e-102	FALSE	1.74273660374929e-100
CHEMBL1230609	FORETINIB	EFO_0000685	rheumatoid arthritis	2302	3417	403	64102	4.1390422515045	1.92435504470366e-102	FALSE	2.16687050215835e-100
CHEMBL1421	DASATINIB	EFO_0001645	coronary heart disease	4246	2120	434	64102	3.92819780766372	2.21810892518286e-102	FALSE	2.49386019383627e-100
CHEMBL502835	NINTEDANIB	EFO_0000378	coronary artery disease	2163	3553	397	64102	4.18699753645514	3.59889770939141e-102	FALSE	4.04018463729787e-100
CHEMBL572878	TOZASERTIB	EFO_0002508	Parkinson's disease	2870	3371	454	64102	3.75684237222945	3.87820942703437e-102	FALSE	4.34716813494087e-100
CHEMBL27759	ENTINOSTAT	EFO_0002614	insulin resistance	2971	2330	375	64102	4.37227213009692	3.98989093741914e-102	FALSE	4.4656087030345e-100
CHEMBL601719	CRIZOTINIB	Orphanet_84	Fanconi anemia	2617	3761	458	64102	3.73699882084475	4.96823576534836e-102	FALSE	5.55222793626017e-100
CHEMBL2103875	TRAMETINIB	EFO_0002508	Parkinson's disease	2703	3371	438	64102	3.85484051059207	5.88894772876885e-102	FALSE	6.57126866486154e-100
CHEMBL14762	SELICICLIB	EFO_0001073	obesity	1650	7209	503	64102	3.64536375308143	6.17696339114948e-102	FALSE	6.88230583243615e-100
CHEMBL300138	ENZASTAURIN	EFO_0001073	obesity	1294	7209	432	64102	4.1437093835014	8.01247653105125e-102	FALSE	8.91403029965004e-100
CHEMBL552212	LEXIBULIN	EFO_0000378	coronary artery disease	1991	3553	378	64102	4.34988475374852	1.03804961875627e-101	FALSE	1.15312083772169e-99
CHEMBL552212	LEXIBULIN	EFO_0000692	schizophrenia	1991	5048	460	64102	3.76656169440677	1.21405539463632e-101	FALSE	1.34662153301926e-99
CHEMBL325041	BORTEZOMIB	EFO_0002614	insulin resistance	2931	2330	371	64102	4.38016919809209	2.42515945455844e-101	FALSE	2.68595458694789e-99
CHEMBL502835	NINTEDANIB	EFO_0000249	Alzheimers disease	2163	3757	408	64102	4.06712986790003	3.19051521261911e-101	FALSE	3.52834845532639e-99
CHEMBL272980	MOCETINOSTAT	EFO_0002614	insulin resistance	2992	2330	375	64102	4.33565165833597	3.39832614547855e-101	FALSE	3.75257130394696e-99
CHEMBL1230609	FORETINIB	EFO_0000249	Alzheimers disease	2302	3757	423	64102	3.94782228909093	3.47877148309103e-101	FALSE	3.83569447106642e-99
CHEMBL1908360	EVEROLIMUS	EFO_0001359	type I diabetes mellitus	1590	5458	419	64102	4.08123747556797	3.64877432759515e-101	FALSE	4.01717060799997e-99
CHEMBL865	VALDECOXIB	EFO_0003885	multiple sclerosis	1757	4889	418	64102	4.04098423776968	5.86528418052957e-101	FALSE	6.44790240912884e-99
CHEMBL1171837	PONATINIB	EFO_0000692	schizophrenia	1865	5048	441	64102	3.87427615642165	6.10164223385843e-101	FALSE	6.6978160053767e-99
CHEMBL189963	PALBOCICLIB	EFO_0000195	metabolic syndrome	2222	3177	377	64102	4.31132042371268	6.25363844175917e-101	FALSE	6.85452349439792e-99
CHEMBL572878	TOZASERTIB	EFO_0002614	insulin resistance	2870	2330	366	64102	4.41069401701336	7.3261780169065e-101	FALSE	8.01827492248595e-99
CHEMBL2017974	BUPARLISIB	EFO_0000195	metabolic syndrome	2439	3177	397	64102	4.11782729964478	1.16823431624177e-100	FALSE	1.27483569759884e-98
CHEMBL98	VORINOSTAT	EFO_0000612	myocardial infarction	4984	1504	385	64102	4.3389127592136	1.23091587543285e-100	FALSE	1.34126450127011e-98
CHEMBL552212	LEXIBULIN	EFO_0000249	Alzheimers disease	1991	3757	388	64102	4.22021252590184	1.30862758569752e-100	FALSE	1.42385205273731e-98
CHEMBL178	DAUNORUBICIN	HP_0003124	hypercholesterolemia	1724	4983	417	64102	4.03976815379818	1.61333232700792e-100	FALSE	1.75281589056549e-98
CHEMBL1171837	PONATINIB	HP_0003124	hypercholesterolemia	1865	4983	437	64102	3.88384344550395	1.75863938260603e-100	FALSE	1.90789233020878e-98
CHEMBL1229517	VEMURAFENIB	EFO_0000673	prostate adenocarcinoma	2910	3249	445	64102	3.75929781000875	2.03709332571472e-100	FALSE	2.20675197422862e-98
CHEMBL1751	DIGOXIN	HP_0003124	hypercholesterolemia	1932	4983	446	64102	3.81202439492311	2.96822938007834e-100	FALSE	3.21075016251769e-98
CHEMBL483254	PANOBINOSTAT	EFO_0000378	coronary artery disease	2060	3553	383	64102	4.24132411615157	3.27279921978316e-100	FALSE	3.5350519083553e-98
CHEMBL865	VALDECOXIB	EFO_0004211	Hypertriglyceridemia	1757	3627	354	64102	4.55367768749635	3.37110571772953e-100	FALSE	3.6359433108157e-98
CHEMBL288441	BOSUTINIB	EFO_0001359	type I diabetes mellitus	1594	5458	418	64102	4.05305345486771	3.60011208091797e-100	FALSE	3.87730503576949e-98
CHEMBL521851	PICTILISIB	EFO_0002614	insulin resistance	3076	2330	379	64102	4.25488952944857	4.51223959561768e-100	FALSE	4.85261940859145e-98
CHEMBL1287853	FEDRATINIB	EFO_0000270	asthma	3684	2121	397	64102	4.11187957366311	5.49952715121477e-100	FALSE	5.90582362164822e-98
CHEMBL603469	LESTAURTINIB	HP_0003124	hypercholesterolemia	1691	4983	411	64102	4.06217274924452	9.23848389692101e-100	FALSE	9.9066719302171e-98
CHEMBL255863	NILOTINIB	EFO_0000378	coronary artery disease	2045	3553	380	64102	4.23528893654967	2.5141122468542e-99	FALSE	2.69205915263803e-97
CHEMBL608533	MIDOSTAURIN	EFO_0001073	obesity	1525	7209	474	64102	3.73897043097668	2.84222889294225e-99	FALSE	3.03901433718703e-97
CHEMBL223360	LINIFANIB	EFO_0000270	asthma	3168	2121	364	64102	4.37206465363153	3.52486651856208e-99	FALSE	3.76349237424315e-97
CHEMBL1079175	MK-2206	EFO_0002614	insulin resistance	2937	2330	368	64102	4.32225726820083	3.70933999651405e-99	FALSE	3.95476400059375e-97
CHEMBL2103875	TRAMETINIB	EFO_0000673	prostate adenocarcinoma	2703	3249	424	64102	3.85758442726412	4.0573418277743e-99	FALSE	4.31958465322801e-97
CHEMBL1287853	FEDRATINIB	EFO_0003869	breast neoplasm	3684	2205	404	64102	4.00883071891025	9.1972017010509e-99	FALSE	9.77762682272897e-97
CHEMBL2103875	TRAMETINIB	EFO_0002614	insulin resistance	2703	2330	351	64102	4.48049851366882	9.32887217236613e-99	FALSE	9.90341859156551e-97
CHEMBL189963	PALBOCICLIB	EFO_0000685	rheumatoid arthritis	2222	3417	389	64102	4.12460621424662	9.35917723899108e-99	FALSE	9.92139638599047e-97
CHEMBL603469	LESTAURTINIB	EFO_0000692	schizophrenia	1691	5048	412	64102	4.01458316020078	1.44274444032714e-98	FALSE	1.52723040220364e-96
CHEMBL1079175	MK-2206	EFO_0000673	prostate adenocarcinoma	2937	3249	444	64102	3.70568598110013	1.84888892198889e-98	FALSE	1.95437040535877e-96
CHEMBL2103847	TOSEDOSTAT	EFO_0000384	Crohn's disease	2502	3430	417	64102	3.8890141197481	1.93497357804318e-98	FALSE	2.0424568187581e-96
CHEMBL300138	ENZASTAURIN	EFO_0000289	bipolar disorder	1294	5835	380	64102	4.37117042712001	2.62642091012432e-98	FALSE	2.76837448346272e-96
CHEMBL1908360	EVEROLIMUS	EFO_0003758	autism	1590	5501	416	64102	4.00196837947717	3.07571218565062e-98	FALSE	3.23735067710928e-96
CHEMBL1231160	PEVONEDISTAT	EFO_0002508	Parkinson's disease	2455	3371	408	64102	3.94758564243432	3.15624722246774e-98	FALSE	3.31741253743936e-96
CHEMBL300138	ENZASTAURIN	EFO_0003758	autism	1294	5501	368	64102	4.46524187621344	3.64376888571924e-98	FALSE	3.82441117630546e-96
CHEMBL502835	NINTEDANIB	EFO_0000195	metabolic syndrome	2163	3177	367	64102	4.29968872545815	3.67997698965526e-98	FALSE	3.85695893386114e-96
CHEMBL939	GEFITINIB	EFO_0000378	coronary artery disease	2112	3553	385	64102	4.13917263904682	4.80874301928921e-98	FALSE	5.03290233774832e-96
CHEMBL1287853	FEDRATINIB	EFO_0000253	amyotrophic lateral sclerosis	3684	2437	427	64102	3.80984156547299	5.72397610307072e-98	FALSE	5.98236122152624e-96
CHEMBL554	LAPATINIB	EFO_0003761	unipolar depression	1865	4304	398	64102	4.05158609661832	1.09345174250502e-97	FALSE	1.1412037489815e-95
CHEMBL1230609	FORETINIB	EFO_0000378	coronary artery disease	2302	3553	404	64102	3.96451702614778	1.17734537195653e-97	FALSE	1.22703529952296e-95
CHEMBL601719	CRIZOTINIB	EFO_0002614	insulin resistance	2617	2330	343	64102	4.51632926218414	1.59299077416796e-97	FALSE	1.65789453572417e-95
CHEMBL1173655	AFATINIB	EFO_0001073	obesity	1170	7209	399	64102	4.26500069638749	3.09700952579188e-97	FALSE	3.21417610994946e-95
CHEMBL1789941	RUXOLITINIB	EFO_0000537	hypertension	1263	6014	379	64102	4.35232140325091	3.1640218637009e-97	FALSE	3.27913746363025e-95
CHEMBL1241855	RIGOSERTIB	EFO_0000692	schizophrenia	1885	5048	437	64102	3.76990527597702	5.8577476999459e-97	FALSE	6.06240122837497e-95
CHEMBL178	DAUNORUBICIN	EFO_0000692	schizophrenia	1724	5048	414	64102	3.93826685038509	6.66125739924709e-97	FALSE	6.88438168957006e-95
CHEMBL428690	ALVOCIDIB	EFO_0001645	coronary heart disease	4118	2120	417	64102	3.85612960723612	1.04233647663904e-96	FALSE	1.07575213141864e-94
CHEMBL14762	SELICICLIB	HP_0003124	hypercholesterolemia	1650	4983	400	64102	4.04073556547051	1.14841750953722e-96	FALSE	1.1835877957668e-94
CHEMBL1614701	SELUMETINIB	EFO_0001645	coronary heart disease	3317	2120	369	64102	4.21988443794732	1.55753850608411e-96	FALSE	1.60301171766951e-94
CHEMBL217092	SARACATINIB	EFO_0000673	prostate adenocarcinoma	2438	3249	395	64102	3.98403238919789	1.89165201275259e-96	FALSE	1.94418334634772e-94
CHEMBL2103882	TIVANTINIB	HP_0003124	hypercholesterolemia	1591	4983	391	64102	4.10982222038281	2.17932141412218e-96	FALSE	2.2367433683947e-94
CHEMBL608533	MIDOSTAURIN	EFO_0000289	bipolar disorder	1525	5835	416	64102	3.95685718972995	2.47265798761717e-96	FALSE	2.53430367363442e-94
CHEMBL217092	SARACATINIB	EFO_0000384	Crohn's disease	2438	3430	407	64102	3.88736829274302	3.25179962454817e-96	FALSE	3.32827298123582e-94
CHEMBL1751	DIGOXIN	EFO_0000378	coronary artery disease	1932	3553	363	64102	4.27743070028564	3.40322963509463e-96	FALSE	3.47846632330849e-94
CHEMBL1423	PIMOZIDE	EFO_0000289	bipolar disorder	1360	5835	388	64102	4.19889286924423	3.57708419065327e-96	FALSE	3.65113524576927e-94
CHEMBL445813	AT-7519	EFO_0001645	coronary heart disease	3979	2120	408	64102	3.89831252500768	3.71823560457103e-96	FALSE	3.78999550875265e-94
CHEMBL14762	SELICICLIB	EFO_0001359	type I diabetes mellitus	1650	5458	420	64102	3.89169095418031	3.84639100126393e-96	FALSE	3.91524614881741e-94
CHEMBL98	VORINOSTAT	EFO_0000676	psoriasis	4984	1693	405	64102	3.97139357431043	6.23449082697412e-96	FALSE	6.33740262761115e-94
CHEMBL1908360	EVEROLIMUS	EFO_0003885	multiple sclerosis	1590	4889	386	64102	4.13009438589878	6.55369582646699e-96	FALSE	6.65276332151824e-94
CHEMBL1489	AZACITIDINE	EFO_0000378	coronary artery disease	2070	3553	377	64102	4.12653920225884	8.03952297800641e-96	FALSE	8.14990167463067e-94
CHEMBL2028663	DABRAFENIB	EFO_0000692	schizophrenia	2117	5048	466	64102	3.53591117752134	3.14380650273074e-95	FALSE	3.18262157619556e-93
CHEMBL608533	MIDOSTAURIN	EFO_0001359	type I diabetes mellitus	1525	5458	399	64102	4.02897248281008	3.23847668897443e-95	FALSE	3.27399404230718e-93
CHEMBL223360	LINIFANIB	EFO_0000253	amyotrophic lateral sclerosis	3168	2437	387	64102	3.99713277614894	4.61090670671259e-95	FALSE	4.64880886102728e-93
CHEMBL1908394	GSK-461364	EFO_0000195	metabolic syndrome	2431	3177	387	64102	3.99573255178844	5.10495463123691e-95	FALSE	5.13993430679695e-93
CHEMBL1231160	PEVONEDISTAT	EFO_0000673	prostate adenocarcinoma	2455	3249	394	64102	3.9366900604529	6.67845708429041e-95	FALSE	6.71510715365542e-93
CHEMBL939	GEFITINIB	EFO_0000384	Crohn's disease	2112	3430	372	64102	4.1200074068072	1.30611773158466e-94	FALSE	1.31150833927252e-92
CHEMBL255863	NILOTINIB	EFO_0000195	metabolic syndrome	2045	3177	350	64102	4.3261035211506	1.5001503905539e-94	FALSE	1.50430621258179e-92
CHEMBL1173655	AFATINIB	EFO_0000537	hypertension	1170	6014	358	64102	4.46463765395438	1.8154424393269e-94	FALSE	1.8180149286134e-92
CHEMBL483254	PANOBINOSTAT	EFO_0000195	metabolic syndrome	2060	3177	351	64102	4.30343238802752	2.86580290269363e-94	FALSE	2.86599601609678e-92
CHEMBL1229517	VEMURAFENIB	EFO_0002614	insulin resistance	2910	2330	358	64102	4.2125759381755	5.09735868379772e-94	FALSE	5.09084119961252e-92
CHEMBL2103882	TIVANTINIB	EFO_0003761	unipolar depression	1591	4304	357	64102	4.29246366365444	6.88486428490176e-94	FALSE	6.86681927770343e-92
CHEMBL189963	PALBOCICLIB	EFO_0000249	Alzheimers disease	2222	3757	402	64102	3.85319621090945	8.0323976951245e-94	FALSE	8.00059155660018e-92
CHEMBL865	VALDECOXIB	EFO_0003761	unipolar depression	1757	4304	378	64102	4.07881989375136	9.22424521880656e-94	FALSE	9.17540370591878e-92
CHEMBL521686	OLAPARIB	EFO_0004211	Hypertriglyceridemia	1599	3627	326	64102	4.59262259067324	1.58571900463162e-93	FALSE	1.57521122809491e-91
CHEMBL1489	AZACITIDINE	EFO_0000249	Alzheimers disease	2070	3757	385	64102	3.9748455569747	1.95581687157777e-93	FALSE	1.94025923737204e-91
CHEMBL1064	SIMVASTATIN	EFO_0003758	autism	1206	5501	346	64102	4.50633715215608	2.09998009395701e-93	FALSE	2.08049429735754e-91
CHEMBL521686	OLAPARIB	EFO_0000692	schizophrenia	1599	5048	390	64102	4.00611586782887	2.31889206631603e-93	FALSE	2.29431181041308e-91
CHEMBL98	VORINOSTAT	EFO_0000712	stroke	4984	1475	369	64102	4.19391536092872	2.94943375291025e-93	FALSE	2.91428404307197e-91
CHEMBL507361	PD-0325901	EFO_0001365	age-related macular degeneration	4217	2123	417	64102	3.74179535206951	3.29921560775162e-93	FALSE	3.25556242251608e-91
CHEMBL288441	BOSUTINIB	EFO_0003885	multiple sclerosis	1594	4889	382	64102	4.05621508025911	4.1485817633695e-93	FALSE	4.08825378155157e-91
CHEMBL865	VALDECOXIB	HP_0003124	hypercholesterolemia	1757	4983	409	64102	3.83162536526336	5.85407413236016e-93	FALSE	5.7612940449839e-91
CHEMBL255863	NILOTINIB	EFO_0003761	unipolar depression	2045	4304	412	64102	3.76996225929851	7.0467853451855e-93	FALSE	6.92591664290715e-91
CHEMBL1230609	FORETINIB	EFO_0002508	Parkinson's disease	2302	3371	384	64102	3.94205986734895	9.91836958125539e-93	FALSE	9.73535204731556e-91
CHEMBL1908394	GSK-461364	EFO_0000673	prostate adenocarcinoma	2431	3249	388	64102	3.9039194884957	1.16216493212997e-92	FALSE	1.13921332613876e-90
CHEMBL1230609	FORETINIB	EFO_0000195	metabolic syndrome	2302	3177	371	64102	4.03928586544095	1.57428754347547e-92	FALSE	1.54116104437464e-90
CHEMBL2028663	DABRAFENIB	EFO_0003761	unipolar depression	2117	4304	420	64102	3.70186399832569	1.64784853316608e-92	FALSE	1.61104875367048e-90
CHEMBL1078983	AZD-2014	EFO_0000384	Crohn's disease	2110	3430	368	64102	4.06560167454692	2.78059756140293e-92	FALSE	2.7149242374198e-90
CHEMBL1789941	RUXOLITINIB	EFO_0001073	obesity	1263	7209	410	64102	3.96208340780541	2.81793178849383e-92	FALSE	2.74776121373436e-90
CHEMBL1078983	AZD-2014	EFO_0000378	coronary artery disease	2110	3553	375	64102	3.99998881847736	4.56129008009267e-92	FALSE	4.44187047760205e-90
CHEMBL939	GEFITINIB	EFO_0000685	rheumatoid arthritis	2112	3417	367	64102	4.06419744169022	5.0049002550458e-92	FALSE	4.8674786818568e-90
CHEMBL1289494	TIVOZANIB	EFO_0000195	metabolic syndrome	2141	3177	355	64102	4.16534124700945	6.0904292961037e-92	FALSE	5.91544903033214e-90
CHEMBL189963	PALBOCICLIB	EFO_0000673	prostate adenocarcinoma	2222	3249	367	64102	4.05003163257208	7.97291409639657e-92	FALSE	7.73372667350467e-90
CHEMBL1231160	PEVONEDISTAT	EFO_0000384	Crohn's disease	2455	3430	401	64102	3.7783071571492	9.55257970428734e-92	FALSE	9.24184063828738e-90
CHEMBL1289494	TIVOZANIB	EFO_0000384	Crohn's disease	2141	3430	370	64102	4.02143812236176	1.30632662182321e-91	FALSE	1.26218706995301e-89
CHEMBL2028663	DABRAFENIB	EFO_0000249	Alzheimers disease	2117	3757	387	64102	3.89096622459596	1.32616171960245e-91	FALSE	1.27968570095059e-89
CHEMBL1614701	SELUMETINIB	EFO_0000270	asthma	3317	2121	361	64102	4.09559628518933	1.62645283378401e-91	FALSE	1.56741470819406e-89
CHEMBL502835	NINTEDANIB	EFO_0000384	Crohn's disease	2163	3430	372	64102	3.99929764600781	1.7113305915443e-91	FALSE	1.64707245843768e-89
CHEMBL1614701	SELUMETINIB	EFO_0003869	breast neoplasm	3317	2205	369	64102	4.01881922385604	2.01853695012523e-91	FALSE	1.94022712932698e-89
CHEMBL1879463	DACTOLISIB	EFO_0000270	asthma	3807	2121	390	64102	3.86163505088767	2.15114811494162e-91	FALSE	2.06501870464739e-89
CHEMBL1489	AZACITIDINE	EFO_0000195	metabolic syndrome	2070	3177	347	64102	4.21288215791142	3.80014638260714e-91	FALSE	3.64327987495301e-89
CHEMBL1421	DASATINIB	EFO_0000712	stroke	4246	1475	335	64102	4.41157803211202	4.51989766155758e-91	FALSE	4.3277291093662e-89
CHEMBL1423	PIMOZIDE	EFO_0001073	obesity	1360	7209	427	64102	3.77586342396928	6.85871973171474e-91	FALSE	6.55865074345222e-89
CHEMBL2103882	TIVANTINIB	EFO_0004211	Hypertriglyceridemia	1591	3627	321	64102	4.52624479934137	7.94660122908116e-91	FALSE	7.58915758306265e-89
CHEMBL1289494	TIVOZANIB	EFO_0002508	Parkinson's disease	2141	3371	365	64102	4.03067028006742	9.37077049433177e-91	FALSE	8.93776381146387e-89
CHEMBL1078983	AZD-2014	Orphanet_84	Fanconi anemia	2110	3761	385	64102	3.87526244543932	9.93534301913362e-91	FALSE	9.464083809176e-89
CHEMBL939	GEFITINIB	EFO_0000195	metabolic syndrome	2112	3177	350	64102	4.15693861264888	1.5437238295095e-90	FALSE	1.46861572780452e-88
CHEMBL1173655	AFATINIB	EFO_0000289	bipolar disorder	1170	5835	346	64102	4.39431301041036	2.29316429810764e-90	FALSE	2.17879970219049e-88
CHEMBL2017974	BUPARLISIB	EFO_0000384	Crohn's disease	2439	3430	397	64102	3.75843381596792	2.51559712779286e-90	FALSE	2.38708292669909e-88
CHEMBL483254	PANOBINOSTAT	EFO_0000673	prostate adenocarcinoma	2060	3249	349	64102	4.15968973226043	2.69661092285165e-90	FALSE	2.55558127113929e-88
CHEMBL1879463	DACTOLISIB	EFO_0001645	coronary heart disease	3807	2120	388	64102	3.83733036464022	2.76551171710545e-90	FALSE	2.61753567560982e-88
CHEMBL121	ROSIGLITAZONE	EFO_0000537	hypertension	1109	6014	340	64102	4.46640338967796	5.98793564528544e-90	FALSE	5.66031547208161e-88
CHEMBL1241855	RIGOSERTIB	EFO_0004211	Hypertriglyceridemia	1885	3627	352	64102	4.13243674116673	6.23906653710668e-90	FALSE	5.89020270211198e-88
CHEMBL223360	LINIFANIB	EFO_0003869	breast neoplasm	3168	2205	357	64102	4.06051990068382	7.77731795266183e-90	FALSE	7.33311154608985e-88
CHEMBL603469	LESTAURTINIB	EFO_0003761	unipolar depression	1691	4304	363	64102	4.0554666492006	1.10862130020268e-89	FALSE	1.04397517235457e-87
CHEMBL1289494	TIVOZANIB	EFO_0000685	rheumatoid arthritis	2141	3417	366	64102	3.98134424397247	1.13086755238023e-89	FALSE	1.06357448319867e-87
CHEMBL255863	NILOTINIB	EFO_0000685	rheumatoid arthritis	2045	3417	356	64102	4.06231704645323	2.05731382834565e-89	FALSE	1.93244269154922e-87
CHEMBL408513	BELINOSTAT	EFO_0000270	asthma	3180	2121	349	64102	4.11495940689097	2.77353831023013e-89	FALSE	2.60190152099402e-87
CHEMBL603469	LESTAURTINIB	EFO_0000378	coronary artery disease	1691	3553	326	64102	4.37999101837709	3.42977094263862e-89	FALSE	3.21346152523357e-87
CHEMBL1489	AZACITIDINE	EFO_0000685	rheumatoid arthritis	2070	3417	358	64102	4.03133966219987	4.15673815636048e-89	FALSE	3.8896690402614e-87
CHEMBL552212	LEXIBULIN	EFO_0000685	rheumatoid arthritis	1991	3417	350	64102	4.10594451991634	4.5652694630529e-89	FALSE	4.26657204667305e-87
CHEMBL1908394	GSK-461364	EFO_0000384	Crohn's disease	2431	3430	394	64102	3.73584233834103	4.8236826346949e-89	FALSE	4.50240716864824e-87
CHEMBL2103847	TOSEDOSTAT	Orphanet_84	Fanconi anemia	2502	3761	423	64102	3.55103087192777	5.16400706861095e-89	FALSE	4.81400935334517e-87
CHEMBL1789941	RUXOLITINIB	EFO_0001359	type I diabetes mellitus	1263	5458	347	64102	4.278744228305	6.25579757566844e-89	FALSE	5.82448505774751e-87
CHEMBL1751	DIGOXIN	EFO_0004211	Hypertriglyceridemia	1932	3627	355	64102	4.05211141966938	1.08982614925526e-88	FALSE	1.01341540608379e-86
CHEMBL1879463	DACTOLISIB	EFO_0000764	HIV infection	3807	1866	357	64102	4.03120794746008	2.06199463758074e-88	FALSE	1.9150226793702e-86
CHEMBL288441	BOSUTINIB	HP_0003124	hypercholesterolemia	1594	4983	378	64102	3.90894007951688	2.8102254786914e-88	FALSE	2.60665977057869e-86
CHEMBL1287853	FEDRATINIB	EFO_0001365	age-related macular degeneration	3684	2123	377	64102	3.83101856664377	7.255118916455e-88	FALSE	6.72117477147994e-86
CHEMBL502835	NINTEDANIB	EFO_0002508	Parkinson's disease	2163	3371	362	64102	3.93652396805561	1.17223896659785e-87	FALSE	1.08461337302237e-85
CHEMBL1171837	PONATINIB	EFO_0000249	Alzheimers disease	1865	3757	353	64102	4.03510549119014	1.20754465292693e-87	FALSE	1.1158885550491e-85
CHEMBL483254	PANOBINOSTAT	EFO_0000249	Alzheimers disease	2060	3757	374	64102	3.84650691648329	1.50024941753469e-87	FALSE	1.38465184114629e-85
CHEMBL217092	SARACATINIB	EFO_0002508	Parkinson's disease	2438	3371	388	64102	3.72350060824764	1.75428237088855e-87	FALSE	1.61709966871782e-85
CHEMBL1287853	FEDRATINIB	EFO_0001645	coronary heart disease	3684	2120	376	64102	3.82422087949179	1.82467498088724e-87	FALSE	1.67990083072875e-85
CHEMBL1421	DASATINIB	EFO_0000764	HIV infection	4246	1866	378	64102	3.8335968858357	1.88207261475728e-87	FALSE	1.73059725375544e-85
CHEMBL1489	AZACITIDINE	EFO_0000384	Crohn's disease	2070	3430	356	64102	3.98362577735209	1.93643315722051e-87	FALSE	1.77837899048945e-85
CHEMBL98	VORINOSTAT	HP_0000545	Myopia	4984	1322	337	64102	4.27997207982866	2.04151346685313e-87	FALSE	1.87256497908327e-85
CHEMBL1908394	GSK-461364	EFO_0002508	Parkinson's disease	2431	3371	387	64102	3.72393832894889	2.74942389181459e-87	FALSE	2.5187777764457e-85
CHEMBL865	VALDECOXIB	EFO_0000692	schizophrenia	1757	5048	402	64102	3.68414769869596	3.36377879929652e-87	FALSE	3.07779538596545e-85
CHEMBL1421	DASATINIB	EFO_0001365	age-related macular degeneration	4246	2123	408	64102	3.60363737685543	3.45877133540852e-87	FALSE	3.1608143712314e-85
CHEMBL27759	ENTINOSTAT	EFO_0003869	breast neoplasm	2971	2205	340	64102	4.10650752260435	4.12856437420691e-87	FALSE	3.76826715114421e-85
CHEMBL1078983	AZD-2014	EFO_0000195	metabolic syndrome	2110	3177	344	64102	4.06755609303789	5.79756708687068e-87	FALSE	5.28511628601031e-85
CHEMBL2028663	DABRAFENIB	EFO_0000685	rheumatoid arthritis	2117	3417	359	64102	3.93511259173097	6.6422598744271e-87	FALSE	6.047716490575e-85
CHEMBL2028663	DABRAFENIB	EFO_0000378	coronary artery disease	2117	3553	367	64102	3.87048957553939	7.12692957855657e-87	FALSE	6.48105158549988e-85
CHEMBL1489	AZACITIDINE	EFO_0000673	prostate adenocarcinoma	2070	3249	344	64102	4.05648952399221	1.2415085273077e-86	FALSE	1.12761493597146e-84
CHEMBL1064	SIMVASTATIN	EFO_0001073	obesity	1206	7209	389	64102	3.91431931117308	1.32806069554056e-86	FALSE	1.20475237056953e-84
CHEMBL1489	AZACITIDINE	EFO_0002508	Parkinson's disease	2070	3371	351	64102	3.98991742594411	1.63995139366623e-86	FALSE	1.48586804843715e-84
CHEMBL217092	SARACATINIB	EFO_0002614	insulin resistance	2438	2330	313	64102	4.35575439131008	2.51169728686325e-86	FALSE	2.27293289233765e-84
CHEMBL1789941	RUXOLITINIB	EFO_0003758	autism	1263	5501	344	64102	4.18692200969571	3.99581340902442e-86	FALSE	3.61156314271202e-84
CHEMBL1079175	MK-2206	EFO_0000253	amyotrophic lateral sclerosis	2937	2437	356	64102	3.91614955272374	4.30538889748446e-86	FALSE	3.88663483136052e-84
CHEMBL521686	OLAPARIB	HP_0003124	hypercholesterolemia	1599	4983	375	64102	3.84869312384691	4.32330036349501e-86	FALSE	3.89806201060932e-84
CHEMBL1421	DASATINIB	EFO_0005306	ventricular tachycardia	4246	1359	312	64102	4.45452796287615	5.49099433221228e-86	FALSE	4.94489362162394e-84
CHEMBL601719	CRIZOTINIB	EFO_0003869	breast neoplasm	2617	2205	315	64102	4.31454470498416	6.63619571180286e-86	FALSE	5.96895639750705e-84
CHEMBL1289494	TIVOZANIB	Orphanet_84	Fanconi anemia	2141	3761	380	64102	3.73821479942346	6.65145786556924e-86	FALSE	5.97544105223445e-84
CHEMBL1908394	GSK-461364	Orphanet_84	Fanconi anemia	2431	3761	410	64102	3.53049729291194	7.50885715342862e-86	FALSE	6.73754226203351e-84
CHEMBL1229517	VEMURAFENIB	EFO_0003869	breast neoplasm	2910	2205	334	64102	4.11076342969321	7.90999728366055e-86	FALSE	7.08890517432404e-84
CHEMBL98	VORINOSTAT	EFO_0003095	non-alcoholic fatty liver disease	4984	1226	320	64102	4.40825331845486	8.59240280930544e-86	FALSE	7.69118516845006e-84
CHEMBL1423	PIMOZIDE	EFO_0003758	autism	1360	5501	359	64102	4.0176703048268	8.85311528371387e-86	FALSE	7.91500505575889e-84
CHEMBL552212	LEXIBULIN	EFO_0000673	prostate adenocarcinoma	1991	3249	335	64102	4.10945924600949	9.24139470268771e-86	FALSE	8.25219848270688e-84
CHEMBL491473	CEDIRANIB	EFO_0000537	hypertension	1119	6014	335	64102	4.31168073225666	1.41701000929392e-85	FALSE	1.26381283340932e-83
CHEMBL288441	BOSUTINIB	EFO_0004211	Hypertriglyceridemia	1594	3627	313	64102	4.36419310157669	2.03910638777703e-85	FALSE	1.81429124106708e-83
CHEMBL98	VORINOSTAT	EFO_0000729	ulcerative colitis	4984	1773	398	64102	3.64429579625191	2.38022676087696e-85	FALSE	2.11526618911227e-83
CHEMBL27759	ENTINOSTAT	EFO_0000253	amyotrophic lateral sclerosis	2971	2437	357	64102	3.87730731055929	2.7038927825731e-85	FALSE	2.40002827668465e-83
CHEMBL572878	TOZASERTIB	EFO_0000253	amyotrophic lateral sclerosis	2870	2437	350	64102	3.93604546348851	2.73174364596789e-85	FALSE	2.42185229688229e-83
CHEMBL1289494	TIVOZANIB	EFO_0002614	insulin resistance	2141	2330	290	64102	4.60167539484716	2.81806037723337e-85	FALSE	2.4953958268807e-83
CHEMBL1976040	AZD-1775	EFO_0003869	breast neoplasm	2693	2205	319	64102	4.24068298526938	2.90799130174592e-85	FALSE	2.57196060245597e-83
CHEMBL98	VORINOSTAT	EFO_0005306	ventricular tachycardia	4984	1359	339	64102	4.15700751128556	3.12006511604205e-85	FALSE	2.75624323733215e-83
CHEMBL521851	PICTILISIB	EFO_0000253	amyotrophic lateral sclerosis	3076	2437	364	64102	3.81707134565912	3.52702422714305e-85	FALSE	3.11204319589952e-83
CHEMBL865	VALDECOXIB	EFO_0000249	Alzheimers disease	1757	3757	337	64102	4.0889496541866	3.60757794275686e-85	FALSE	3.1793387320935e-83
CHEMBL1241855	RIGOSERTIB	EFO_0000378	coronary artery disease	1885	3553	340	64102	4.04127987206599	5.14660869416528e-85	FALSE	4.53029772420563e-83
CHEMBL428690	ALVOCIDIB	EFO_0000712	stroke	4118	1475	320	64102	4.29134511137034	6.12410026296192e-85	FALSE	5.38434668261954e-83
CHEMBL1078983	AZD-2014	EFO_0000685	rheumatoid arthritis	2110	3417	355	64102	3.89306677823915	6.13230786699717e-85	FALSE	5.38518231089378e-83
CHEMBL1423	PIMOZIDE	EFO_0001359	type I diabetes mellitus	1360	5458	356	64102	4.00612208346923	6.61927810845131e-85	FALSE	5.80595191533841e-83
CHEMBL2017974	BUPARLISIB	Orphanet_84	Fanconi anemia	2439	3761	409	64102	3.50473158465505	7.3943487110183e-85	FALSE	6.47813041441692e-83
CHEMBL507361	PD-0325901	EFO_0000712	stroke	4217	1475	324	64102	4.24684851244891	7.71310795314804e-85	FALSE	6.7494242413131e-83
CHEMBL491473	CEDIRANIB	EFO_0003885	multiple sclerosis	1119	4889	299	64102	4.63861980137421	8.72127806227592e-85	FALSE	7.62264356432491e-83
CHEMBL255863	NILOTINIB	EFO_0000384	Crohn's disease	2045	3430	349	64102	3.93901928310415	9.74978627001107e-85	FALSE	8.51156341371967e-83
CHEMBL2017974	BUPARLISIB	EFO_0000673	prostate adenocarcinoma	2439	3249	375	64102	3.7167187139104	1.13616438797847e-84	FALSE	9.90705974264893e-83
CHEMBL1423	PIMOZIDE	EFO_0000537	hypertension	1360	6014	375	64102	3.85472712080121	1.92968039571528e-84	FALSE	1.67868621059851e-82
CHEMBL1751	DIGOXIN	EFO_0000195	metabolic syndrome	1932	3177	323	64102	4.17206547121209	2.29786322720755e-84	FALSE	1.99430340087645e-82
CHEMBL14762	SELICICLIB	EFO_0003885	multiple sclerosis	1650	4889	375	64102	3.77458199601443	2.61543222578038e-84	FALSE	2.26726808778076e-82
CHEMBL189963	PALBOCICLIB	EFO_0002508	Parkinson's disease	2222	3371	362	64102	3.80797068522253	2.63245533989289e-84	FALSE	2.27936229284425e-82
CHEMBL507361	PD-0325901	EFO_0000764	HIV infection	4217	1866	371	64102	3.76704382143114	3.08714009811513e-84	FALSE	2.66994441702369e-82
CHEMBL1751	DIGOXIN	EFO_0003761	unipolar depression	1932	4304	383	64102	3.67278629319359	4.60323357580413e-84	FALSE	3.97189473828541e-82
CHEMBL552212	LEXIBULIN	EFO_0000195	metabolic syndrome	1991	3177	328	64102	4.10256347610556	5.28058959452951e-84	FALSE	4.55105866274172e-82
CHEMBL521851	PICTILISIB	EFO_0000270	asthma	3076	2121	334	64102	4.03789198456986	5.29624372754158e-84	FALSE	4.55925482369168e-82
CHEMBL554	LAPATINIB	EFO_0000685	rheumatoid arthritis	1865	3417	329	64102	4.10267372837297	5.34658722273777e-84	FALSE	4.59725961602846e-82
CHEMBL554	LAPATINIB	EFO_0000195	metabolic syndrome	1865	3177	316	64102	4.23363557032552	5.43203042403655e-84	FALSE	4.66532196314389e-82
CHEMBL1241855	RIGOSERTIB	EFO_0000685	rheumatoid arthritis	1885	3417	331	64102	4.08121785147177	5.53437761259529e-84	FALSE	4.74772821667785e-82
CHEMBL521686	OLAPARIB	EFO_0003761	unipolar depression	1599	4304	342	64102	4.02018580494781	5.7908935788074e-84	FALSE	4.96204685930027e-82
CHEMBL608533	MIDOSTAURIN	EFO_0004211	Hypertriglyceridemia	1525	3627	303	64102	4.41980652741333	6.04705964162938e-84	FALSE	5.17557163445338e-82
CHEMBL608533	MIDOSTAURIN	EFO_0003885	multiple sclerosis	1525	4889	357	64102	3.91497243867134	6.21058478363937e-84	FALSE	5.30940603536819e-82
CHEMBL1171837	PONATINIB	EFO_0000378	coronary artery disease	1865	3553	336	64102	4.03161062162993	7.45313949641265e-84	FALSE	6.35701398081954e-82
CHEMBL2017974	BUPARLISIB	EFO_0002614	insulin resistance	2439	2330	309	64102	4.28101337330813	9.777852208463e-84	FALSE	8.3302585893111e-82
CHEMBL1976040	AZD-1775	EFO_0000253	amyotrophic lateral sclerosis	2693	2437	335	64102	4.00834022561315	9.90159057815345e-84	FALSE	8.42600377123712e-82
CHEMBL98	VORINOSTAT	EFO_0002690	systemic lupus erythematosus	4984	1452	350	64102	3.97649925177353	1.11543442104249e-83	FALSE	9.48119257886115e-82
CHEMBL178	DAUNORUBICIN	EFO_0003761	unipolar depression	1724	4304	357	64102	3.86636348621137	1.24938496763988e-83	FALSE	1.06076214558029e-81
CHEMBL603469	LESTAURTINIB	EFO_0000249	Alzheimers disease	1691	3757	327	64102	4.12236085812162	1.52483315485625e-83	FALSE	1.29314564864124e-81
CHEMBL2103847	TOSEDOSTAT	EFO_0002614	insulin resistance	2502	2330	313	64102	4.22374392865516	1.75703660118378e-83	FALSE	1.48836644966715e-81
CHEMBL608533	MIDOSTAURIN	HP_0003124	hypercholesterolemia	1525	4983	360	64102	3.87409736632525	1.9381458959339e-83	FALSE	1.63991010499173e-81
CHEMBL1241855	RIGOSERTIB	EFO_0000249	Alzheimers disease	1885	3757	348	64102	3.90596642550344	2.45821069648342e-83	FALSE	2.07758000834342e-81
CHEMBL554	LAPATINIB	Orphanet_84	Fanconi anemia	1865	3761	346	64102	3.92355045150703	2.58592783008706e-83	FALSE	2.18303497874414e-81
CHEMBL1171837	PONATINIB	EFO_0004211	Hypertriglyceridemia	1865	3627	339	64102	3.98284747334322	2.60117433995193e-83	FALSE	2.19341070336515e-81
CHEMBL809	SERTRALINE	EFO_0004211	Hypertriglyceridemia	1061	3627	247	64102	5.35665099897578	4.28481212656896e-83	FALSE	3.60901797788933e-81
CHEMBL521851	PICTILISIB	EFO_0003869	breast neoplasm	3076	2205	340	64102	3.94202327216934	4.4369558438711e-83	FALSE	3.7329286666038e-81
CHEMBL445813	AT-7519	EFO_0000712	stroke	3979	1475	311	64102	4.29453371084249	5.82576993630864e-83	FALSE	4.8958239878118e-81
CHEMBL408513	BELINOSTAT	EFO_0000253	amyotrophic lateral sclerosis	3180	2437	367	64102	3.70950797996383	7.49765418731772e-83	FALSE	6.29370394762343e-81
CHEMBL507361	PD-0325901	EFO_0005306	ventricular tachycardia	4217	1359	306	64102	4.37124883613314	7.60356843132521e-83	FALSE	6.37539881860437e-81
CHEMBL445813	AT-7519	EFO_0001365	age-related macular degeneration	3979	2123	385	64102	3.59832932239928	9.46731951947141e-83	FALSE	7.92914723411259e-81
CHEMBL491473	CEDIRANIB	EFO_0003758	autism	1119	5501	315	64102	4.36641134741339	1.01600903171033e-82	FALSE	8.49019709437671e-81
CHEMBL507361	PD-0325901	EFO_0000729	ulcerative colitis	4217	1773	357	64102	3.81922512410575	1.45978412487003e-82	FALSE	1.21848460051721e-80
CHEMBL572878	TOZASERTIB	EFO_0003869	breast neoplasm	2870	2205	326	64102	4.04768187475589	1.67214474903612e-82	FALSE	1.39417416968793e-80
CHEMBL521686	OLAPARIB	EFO_0000685	rheumatoid arthritis	1599	3417	299	64102	4.38037192790924	2.02800374878702e-82	FALSE	1.68897887967162e-80
CHEMBL1230609	FORETINIB	EFO_0000384	Crohn's disease	2302	3430	370	64102	3.67577758189135	2.11825280763114e-82	FALSE	1.76216311199853e-80
CHEMBL2216870	IDELALISIB	EFO_0000537	hypertension	1030	6014	314	64102	4.41408679065336	2.25166004509327e-82	FALSE	1.87104628943052e-80
CHEMBL428690	ALVOCIDIB	EFO_0001365	age-related macular degeneration	4118	2123	392	64102	3.54033807340079	2.6834769347016e-82	FALSE	2.22737590536389e-80
CHEMBL408513	BELINOSTAT	EFO_0003869	breast neoplasm	3180	2205	345	64102	3.86429572270091	3.36629006067928e-82	FALSE	2.79101177600789e-80
CHEMBL1976040	AZD-1775	EFO_0002614	insulin resistance	2693	2330	324	64102	4.04991334197536	3.61598626765858e-82	FALSE	2.99469041285274e-80
CHEMBL1287853	FEDRATINIB	EFO_0000764	HIV infection	3684	1866	340	64102	3.92396613186986	4.60339200836684e-82	FALSE	3.80819067983123e-80
CHEMBL1289494	TIVOZANIB	EFO_0000378	coronary artery disease	2141	3553	361	64102	3.7342703685075	5.54511051672454e-82	FALSE	4.58212612353613e-80
CHEMBL27759	ENTINOSTAT	EFO_0001645	coronary heart disease	2971	2120	324	64102	4.04377439965295	6.98487811914218e-82	FALSE	5.76543805151219e-80
CHEMBL1423	PIMOZIDE	EFO_0004211	Hypertriglyceridemia	1360	3627	281	64102	4.62270904047956	8.00438132487359e-82	FALSE	6.5980909462957e-80
CHEMBL1789941	RUXOLITINIB	EFO_0003885	multiple sclerosis	1263	4889	316	64102	4.25157200639058	8.01142772402456e-82	FALSE	6.5980909462957e-80
CHEMBL1231160	PEVONEDISTAT	EFO_0002614	insulin resistance	2455	2330	307	64102	4.21222845088704	8.96089984607064e-82	FALSE	7.37187996760168e-80
CHEMBL1789941	RUXOLITINIB	EFO_0000289	bipolar disorder	1263	5835	348	64102	3.97560065268601	1.02116954949567e-81	FALSE	8.3915710321513e-80
CHEMBL180022	NERATINIB	EFO_0000253	amyotrophic lateral sclerosis	3106	2437	360	64102	3.71918137774962	1.06954970267153e-81	FALSE	8.77941766446247e-80
CHEMBL272980	MOCETINOSTAT	EFO_0000270	asthma	2992	2121	325	64102	4.02442535191113	1.17604538049984e-81	FALSE	9.64292237126965e-80
CHEMBL491473	CEDIRANIB	EFO_0001359	type I diabetes mellitus	1119	5458	312	64102	4.34525491639409	1.2138020424707e-81	FALSE	9.94152103328237e-80
CHEMBL1173655	AFATINIB	EFO_0003758	autism	1170	5501	321	64102	4.21542838579145	3.30563657974685e-81	FALSE	2.70446265049741e-79
CHEMBL2028663	DABRAFENIB	EFO_0000384	Crohn's disease	2117	3430	350	64102	3.78840361475358	3.65511408984378e-81	FALSE	2.98708965899623e-79
CHEMBL2028663	DABRAFENIB	EFO_0000195	metabolic syndrome	2117	3177	335	64102	3.91219635848512	3.72161249863033e-81	FALSE	3.0380886189314e-79
CHEMBL217092	SARACATINIB	Orphanet_84	Fanconi anemia	2438	3761	402	64102	3.42711753656084	3.97600328635482e-81	FALSE	3.24219037213142e-79
CHEMBL2103882	TIVANTINIB	EFO_0000692	schizophrenia	1591	5048	368	64102	3.71786450072471	4.14638102576893e-81	FALSE	3.37741167966173e-79
CHEMBL554	LAPATINIB	EFO_0000249	Alzheimers disease	1865	3757	342	64102	3.86806676337323	4.53309159841188e-81	FALSE	3.68835594364203e-79
CHEMBL121	ROSIGLITAZONE	EFO_0001073	obesity	1109	7209	360	64102	3.93940694746281	5.50554945726534e-81	FALSE	4.47469110050794e-79
CHEMBL1241855	RIGOSERTIB	EFO_0000195	metabolic syndrome	1885	3177	313	64102	4.12620048906858	6.14587507865201e-81	FALSE	4.98965711390999e-79
CHEMBL1064	SIMVASTATIN	EFO_0001359	type I diabetes mellitus	1206	5458	325	64102	4.1514289566173	6.29087177253919e-81	FALSE	5.10179387848384e-79
CHEMBL408513	BELINOSTAT	EFO_0001645	coronary heart disease	3180	2120	335	64102	3.90111786316514	6.92706474016091e-81	FALSE	5.61160304632795e-79
CHEMBL300138	ENZASTAURIN	EFO_0003885	multiple sclerosis	1294	4889	319	64102	4.16946741131957	7.19116436609256e-81	FALSE	5.81919685698908e-79
CHEMBL2103882	TIVANTINIB	EFO_0000378	coronary artery disease	1591	3553	302	64102	4.27055718723208	8.09873492427752e-81	FALSE	6.54647739712433e-79
CHEMBL2017974	BUPARLISIB	EFO_0002508	Parkinson's disease	2439	3371	376	64102	3.56989673951157	1.12238703827407e-80	FALSE	9.06275627585718e-79
CHEMBL178	DAUNORUBICIN	EFO_0000195	metabolic syndrome	1724	3177	297	64102	4.29957504749391	1.35849415847837e-80	FALSE	1.09572890249877e-78
CHEMBL506871	VELIPARIB	EFO_0000537	hypertension	1046	6014	314	64102	4.31645706535964	1.58148178536026e-80	FALSE	1.27420038960541e-78
CHEMBL1513	IRBESARTAN	EFO_0003758	autism	956	5501	284	64102	4.692555542467	1.94128927804242e-80	FALSE	1.56240098565225e-78
CHEMBL2103847	TOSEDOSTAT	EFO_0000673	prostate adenocarcinoma	2502	3249	373	64102	3.57699687306098	2.3425379661846e-80	FALSE	1.8832939304521e-78
CHEMBL1484	NICARDIPINE	EFO_0001073	obesity	897	7209	315	64102	4.42095804905301	2.43187111494541e-80	FALSE	1.95299779312256e-78
CHEMBL255863	NILOTINIB	EFO_0000673	prostate adenocarcinoma	2045	3249	331	64102	3.91391370637224	3.0734996807571e-80	FALSE	2.46561128443871e-78
CHEMBL1078983	AZD-2014	EFO_0000673	prostate adenocarcinoma	2110	3249	337	64102	3.85639867065791	3.45731708178248e-80	FALSE	2.77052067012602e-78
CHEMBL189963	PALBOCICLIB	EFO_0002614	insulin resistance	2222	2330	288	64102	4.36297473228972	3.80224604372548e-80	FALSE	3.04364258548705e-78
CHEMBL603469	LESTAURTINIB	EFO_0000195	metabolic syndrome	1691	3177	293	64102	4.32575453946086	4.3015477646494e-80	FALSE	3.4396158607307e-78
CHEMBL14762	SELICICLIB	EFO_0000378	coronary artery disease	1650	3553	307	64102	4.16936269928282	5.5809889995951e-80	FALSE	4.45788254806194e-78
CHEMBL1614701	SELUMETINIB	EFO_0000253	amyotrophic lateral sclerosis	3317	2437	371	64102	3.57889905139983	5.62313626836437e-80	FALSE	4.48671856767719e-78
CHEMBL1421	DASATINIB	EFO_0000612	myocardial infarction	4246	1504	321	64102	4.05625265395293	5.75005199018679e-80	FALSE	4.58305701323105e-78
CHEMBL121	ROSIGLITAZONE	EFO_0003758	autism	1109	5501	309	64102	4.30002128174413	6.01292827805868e-80	FALSE	4.78743930121614e-78
CHEMBL1879463	DACTOLISIB	EFO_0001365	age-related macular degeneration	3807	2123	370	64102	3.59479320626103	7.94555216896735e-80	FALSE	6.31939655625104e-78
CHEMBL491473	CEDIRANIB	EFO_0001073	obesity	1119	7209	360	64102	3.88686211162297	8.65143035988518e-80	FALSE	6.87344100487452e-78
CHEMBL2103847	TOSEDOSTAT	EFO_0002508	Parkinson's disease	2502	3371	380	64102	3.50882838247355	1.08758568566617e-79	FALSE	8.63147548715057e-78
CHEMBL1289494	TIVOZANIB	EFO_0000673	prostate adenocarcinoma	2141	3249	339	64102	3.81764607771199	1.13464663745524e-79	FALSE	8.99534762097926e-78
CHEMBL809	SERTRALINE	EFO_0001073	obesity	1061	7209	348	64102	3.99685368628046	1.25042810202035e-79	FALSE	9.90266993707795e-78
CHEMBL1201129	DECITABINE	EFO_0003758	autism	843	5501	263	64102	5.02259235778566	1.36286287304607e-79	FALSE	1.07815820356485e-77
CHEMBL288441	BOSUTINIB	EFO_0003761	unipolar depression	1594	4304	334	64102	3.90882056129824	1.51816452987174e-79	FALSE	1.19973800787148e-77
CHEMBL289228	TIPIFARNIB	EFO_0000537	hypertension	780	6014	263	64102	5.09221394076449	1.65809107048178e-79	FALSE	1.30892178601171e-77
CHEMBL178	DAUNORUBICIN	EFO_0000378	coronary artery disease	1724	3553	314	64102	4.06602537421557	1.84486925105716e-79	FALSE	1.45481958315299e-77
CHEMBL1473	FLUTICASONE PROPIONATE	EFO_0000537	hypertension	822	6014	271	64102	4.9273010063728	1.89656827661639e-79	FALSE	1.49400051981231e-77
CHEMBL2216870	IDELALISIB	EFO_0003758	autism	1030	5501	295	64102	4.46115024234075	2.14292153037632e-79	FALSE	1.68627245134226e-77
CHEMBL809	SERTRALINE	EFO_0003885	multiple sclerosis	1061	4889	282	64102	4.591382511445	2.22128276520299e-79	FALSE	1.74608355499881e-77
CHEMBL445813	AT-7519	EFO_0000729	ulcerative colitis	3979	1773	340	64102	3.82686232098551	2.33552934583548e-79	FALSE	1.83394661489653e-77
CHEMBL1423	PIMOZIDE	EFO_0003885	multiple sclerosis	1360	4889	326	64102	4.02004205696602	2.44587906405791e-79	FALSE	1.91856718761541e-77
CHEMBL483254	PANOBINOSTAT	EFO_0002614	insulin resistance	2060	2330	275	64102	4.49668112083723	2.70779118888886e-79	FALSE	2.12177027636217e-77
CHEMBL1751	DIGOXIN	EFO_0000249	Alzheimers disease	1932	3757	346	64102	3.75837172492586	3.222147212839e-79	FALSE	2.52214592751813e-77
CHEMBL1908360	EVEROLIMUS	EFO_0000378	coronary artery disease	1590	3553	299	64102	4.21756997576461	5.33588250436482e-79	FALSE	4.17227777909791e-77
CHEMBL1976040	AZD-1775	EFO_0001645	coronary heart disease	2693	2120	302	64102	4.13998897740154	6.05437987859699e-79	FALSE	4.72910798832937e-77
CHEMBL189963	PALBOCICLIB	Orphanet_84	Fanconi anemia	2222	3761	376	64102	3.51963396282794	6.15855201727526e-79	FALSE	4.80541905827456e-77
CHEMBL178	DAUNORUBICIN	EFO_0000384	Crohn's disease	1724	3430	307	64102	4.11068100418271	6.82847868756918e-79	FALSE	5.32255526272133e-77
CHEMBL1079175	MK-2206	EFO_0000270	asthma	2937	2121	317	64102	3.98123568566159	7.44132441851965e-79	FALSE	5.79416031979276e-77
CHEMBL521686	OLAPARIB	EFO_0000249	Alzheimers disease	1599	3757	309	64102	4.10255644616771	8.48655456392633e-79	FALSE	6.60109833769553e-77
CHEMBL576982	QUIZARTINIB	EFO_0003885	multiple sclerosis	976	4889	268	64102	4.79225279718659	8.54355929099602e-79	FALSE	6.63847976113466e-77
CHEMBL325041	BORTEZOMIB	EFO_0000253	amyotrophic lateral sclerosis	2931	2437	343	64102	3.73931923726228	9.63819564323742e-79	FALSE	7.48119568730579e-77
CHEMBL1491	AMLODIPINE	EFO_0001073	obesity	1133	7209	361	64102	3.83174908825264	9.94239640979432e-79	FALSE	7.70925314094867e-77
CHEMBL272980	MOCETINOSTAT	EFO_0001645	coronary heart disease	2992	2120	320	64102	3.94609668833821	1.06012955180247e-78	FALSE	8.21157759827788e-77
CHEMBL552212	LEXIBULIN	EFO_0002508	Parkinson's disease	1991	3371	330	64102	3.85930087032462	1.3218485139499e-78	FALSE	1.02281302375029e-76
CHEMBL428690	ALVOCIDIB	EFO_0000676	psoriasis	4118	1693	336	64102	3.83852549117984	1.38439643998991e-78	FALSE	1.07009518572345e-76
CHEMBL1421	DASATINIB	EFO_0003095	non-alcoholic fatty liver disease	4246	1226	283	64102	4.46114279785267	1.66954762834375e-78	FALSE	1.28916526286418e-76
CHEMBL445813	AT-7519	EFO_0000764	HIV infection	3979	1866	349	64102	3.7138269679265	1.70140748277235e-78	FALSE	1.31240064718422e-76
CHEMBL1171837	PONATINIB	EFO_0003761	unipolar depression	1865	4304	365	64102	3.60115303221819	1.92659690661053e-78	FALSE	1.48455995280409e-76
CHEMBL1484	NICARDIPINE	EFO_0003885	multiple sclerosis	897	4889	255	64102	5.02008802045585	1.93802544559879e-78	FALSE	1.4918172011479e-76
CHEMBL14762	SELICICLIB	EFO_0004211	Hypertriglyceridemia	1650	3627	308	64102	4.08899627944524	1.94792862029333e-78	FALSE	1.49788645874473e-76
CHEMBL608533	MIDOSTAURIN	EFO_0000378	coronary artery disease	1525	3553	291	64102	4.28789115477683	2.19833546047992e-78	FALSE	1.68869029860158e-76
CHEMBL189963	PALBOCICLIB	EFO_0000384	Crohn's disease	2222	3430	355	64102	3.63584011192712	3.02447461183628e-78	FALSE	2.32090112276434e-76
CHEMBL1908360	EVEROLIMUS	HP_0003124	hypercholesterolemia	1590	4983	360	64102	3.66468148059246	3.52321913038557e-78	FALSE	2.70083135919691e-76
CHEMBL809	SERTRALINE	EFO_0001359	type I diabetes mellitus	1061	5458	297	64102	4.35968786543288	3.72985869982714e-78	FALSE	2.8562865306571e-76
CHEMBL325041	BORTEZOMIB	EFO_0003869	breast neoplasm	2931	2205	322	64102	3.88599135079945	8.61210853239287e-78	FALSE	6.5814779984162e-76
CHEMBL572878	TOZASERTIB	EFO_0001645	coronary heart disease	2870	2120	311	64102	3.99208592558414	9.30938797331059e-78	FALSE	7.10702813332832e-76
CHEMBL1079175	MK-2206	EFO_0001645	coronary heart disease	2937	2120	315	64102	3.95086603479958	1.04509367251662e-77	FALSE	7.96213305637535e-76
CHEMBL178	DAUNORUBICIN	EFO_0000249	Alzheimers disease	1724	3757	321	64102	3.9249286348936	1.05572434404178e-77	FALSE	8.0348743538072e-76
CHEMBL178	DAUNORUBICIN	EFO_0000673	prostate adenocarcinoma	1724	3249	296	64102	4.17115984760628	1.12152055667001e-77	FALSE	8.52688861759201e-76
CHEMBL1976040	AZD-1775	EFO_0000270	asthma	2693	2121	300	64102	4.10217103069253	1.15820034715784e-77	FALSE	8.79675094788617e-76
CHEMBL554	LAPATINIB	EFO_0000384	Crohn's disease	1865	3430	319	64102	3.92163898253942	1.5422194331223e-77	FALSE	1.1701471680454e-75
CHEMBL300138	ENZASTAURIN	EFO_0000378	coronary artery disease	1294	3553	264	64102	4.63808479120292	1.69116871160596e-77	FALSE	1.28185060515547e-75
CHEMBL865	VALDECOXIB	EFO_0000195	metabolic syndrome	1757	3177	295	64102	4.16308113122476	2.42208191051202e-77	FALSE	1.83398559356678e-75
CHEMBL300138	ENZASTAURIN	EFO_0001359	type I diabetes mellitus	1294	5458	333	64102	3.89949496032592	2.44378168639512e-77	FALSE	1.8485302756264e-75
CHEMBL2103875	TRAMETINIB	EFO_0001645	coronary heart disease	2703	2120	300	64102	4.08673370959476	2.49078521661306e-77	FALSE	1.88216616088363e-75
CHEMBL180022	NERATINIB	EFO_0000270	asthma	3106	2121	324	64102	3.83677518594022	5.81549043905411e-77	FALSE	4.39001493418118e-75
CHEMBL1421	DASATINIB	EFO_0000676	psoriasis	4246	1693	339	64102	3.74846051476001	6.48672389064369e-77	FALSE	4.89174132423999e-75
CHEMBL1421	DASATINIB	HP_0000545	Myopia	4246	1322	293	64102	4.2373597967968	6.5120992287187e-77	FALSE	4.9058916067723e-75
CHEMBL300138	ENZASTAURIN	EFO_0004211	Hypertriglyceridemia	1294	3627	266	64102	4.5764702978914	6.52727058694499e-77	FALSE	4.91233381241636e-75
CHEMBL502835	NINTEDANIB	Orphanet_84	Fanconi anemia	2163	3761	366	64102	3.51204219076552	8.87875194696762e-77	FALSE	6.67525621301654e-75
CHEMBL272980	MOCETINOSTAT	EFO_0003869	breast neoplasm	2992	2205	324	64102	3.823987586859	9.89273557894548e-77	FALSE	7.4300652189843e-75
CHEMBL178	DAUNORUBICIN	EFO_0004211	Hypertriglyceridemia	1724	3627	313	64102	3.95362486107672	1.12689678906016e-76	FALSE	8.45514420952569e-75
CHEMBL1078983	AZD-2014	EFO_0002508	Parkinson's disease	2110	3371	338	64102	3.70738724616267	1.24991285120186e-76	FALSE	9.36866496196305e-75
CHEMBL603469	LESTAURTINIB	EFO_0000685	rheumatoid arthritis	1691	3417	299	64102	4.08463448803029	1.92861874960491e-76	FALSE	1.44412870145744e-74
CHEMBL27759	ENTINOSTAT	EFO_0000270	asthma	2971	2121	315	64102	3.8958833478351	1.96940442030653e-76	FALSE	1.47318200613756e-74
CHEMBL491473	CEDIRANIB	EFO_0000289	bipolar disorder	1119	5835	315	64102	4.07873610972785	2.00559170634969e-76	FALSE	1.49874050926162e-74
CHEMBL1230609	FORETINIB	EFO_0000673	prostate adenocarcinoma	2302	3249	348	64102	3.61549417727007	2.06444287659312e-76	FALSE	1.54116683760154e-74
CHEMBL1751	DIGOXIN	EFO_0002614	insulin resistance	1932	2330	261	64102	4.53740390778708	2.95465809133299e-76	FALSE	2.20352164489814e-74
CHEMBL506871	VELIPARIB	EFO_0003761	unipolar depression	1046	4304	257	64102	4.74921200442716	4.3049697011573e-76	FALSE	3.20733209512427e-74
CHEMBL2028663	DABRAFENIB	Orphanet_84	Fanconi anemia	2117	3761	360	64102	3.5292625249271	4.40587437451149e-76	FALSE	3.27611952974657e-74
CHEMBL1171837	PONATINIB	EFO_0000673	prostate adenocarcinoma	1865	3249	307	64102	3.97142997286953	4.40762765734918e-76	FALSE	3.27611952974657e-74
CHEMBL428690	ALVOCIDIB	EFO_0000729	ulcerative colitis	4118	1773	341	64102	3.69113281432064	4.41054296909484e-76	FALSE	3.27611952974657e-74
CHEMBL1421	DASATINIB	EFO_0000729	ulcerative colitis	4246	1773	347	64102	3.64633402343467	4.85618139196828e-76	FALSE	3.60352940191006e-74
CHEMBL445813	AT-7519	EFO_0002690	systemic lupus erythematosus	3979	1452	297	64102	4.11817897991688	6.18227421758159e-76	FALSE	4.58297360954687e-74
CHEMBL507361	PD-0325901	EFO_0003095	non-alcoholic fatty liver disease	4217	1226	278	64102	4.38757798826903	6.21160805536301e-76	FALSE	4.6001235104612e-74
CHEMBL2103847	TOSEDOSTAT	EFO_0001645	coronary heart disease	2502	2120	285	64102	4.18671248214256	7.48904631913086e-76	FALSE	5.54062494627224e-74
CHEMBL502835	NINTEDANIB	EFO_0002614	insulin resistance	2163	2330	277	64102	4.28406475845689	8.15803147949286e-76	FALSE	6.02954906310526e-74
CHEMBL1079175	MK-2206	EFO_0003869	breast neoplasm	2937	2205	319	64102	3.82992621733743	8.27180597990589e-76	FALSE	6.10755584814842e-74
CHEMBL45816	MIBEFRADIL	EFO_0003885	multiple sclerosis	1058	4889	276	64102	4.4704397210855	9.78632678938919e-76	FALSE	7.21863200205392e-74
CHEMBL1229517	VEMURAFENIB	EFO_0000270	asthma	2910	2121	310	64102	3.90947753680649	1.18077454799869e-75	FALSE	8.70103032117605e-74
CHEMBL1908394	GSK-461364	EFO_0000253	amyotrophic lateral sclerosis	2431	2437	303	64102	3.97240911197751	1.26403799168162e-75	FALSE	9.30535110840624e-74
CHEMBL178	DAUNORUBICIN	EFO_0000685	rheumatoid arthritis	1724	3417	301	64102	4.02289789411476	1.27218208583614e-75	FALSE	9.35602296129545e-74
CHEMBL576982	QUIZARTINIB	EFO_0000289	bipolar disorder	976	5835	289	64102	4.36750626765189	1.33226654171795e-75	FALSE	9.78820185427531e-74
CHEMBL809	SERTRALINE	HP_0003124	hypercholesterolemia	1061	4983	279	64102	4.42450593947445	1.44679586757342e-75	FALSE	1.0619138214964e-73
CHEMBL1229517	VEMURAFENIB	EFO_0000253	amyotrophic lateral sclerosis	2910	2437	336	64102	3.67162153096148	1.45574799865042e-75	FALSE	1.06742865849658e-73
CHEMBL1908360	EVEROLIMUS	EFO_0000692	schizophrenia	1590	5048	358	64102	3.58240473901579	1.48505251642651e-75	FALSE	1.08784128313355e-73
CHEMBL1751	DIGOXIN	EFO_0000384	Crohn's disease	1932	3430	322	64102	3.80084686048833	2.08324313126025e-75	FALSE	1.5245271849622e-73
CHEMBL507361	PD-0325901	EFO_0000676	psoriasis	4217	1693	335	64102	3.71874015011238	2.22406948570668e-75	FALSE	1.625981046176e-73
CHEMBL2103882	TIVANTINIB	EFO_0000685	rheumatoid arthritis	1591	3417	287	64102	4.17538328725948	2.32681790588617e-75	FALSE	1.69942443608547e-73
CHEMBL483254	PANOBINOSTAT	EFO_0002508	Parkinson's disease	2060	3371	331	64102	3.71503131149389	2.40226465025135e-75	FALSE	1.75280283551526e-73
CHEMBL445813	AT-7519	EFO_0000676	psoriasis	3979	1693	324	64102	3.8047300015297	2.44529328019935e-75	FALSE	1.78244585321408e-73
CHEMBL608533	MIDOSTAURIN	EFO_0000249	Alzheimers disease	1525	3757	295	64102	4.0952911557297	2.73484272615337e-75	FALSE	1.99155058384898e-73
CHEMBL567	PERPHENAZINE	EFO_0000537	hypertension	888	6014	277	64102	4.54193885160996	3.82374990673428e-75	FALSE	2.78177805714919e-73
CHEMBL1908360	EVEROLIMUS	EFO_0003761	unipolar depression	1590	4304	326	64102	3.79447649842881	3.84650992322397e-75	FALSE	2.79559518954784e-73
CHEMBL2103882	TIVANTINIB	EFO_0000249	Alzheimers disease	1591	3757	302	64102	4.00474513873547	4.45889136932189e-75	FALSE	3.23749544090539e-73
CHEMBL1491	AMLODIPINE	EFO_0003758	autism	1133	5501	305	64102	4.09583879514445	5.19644172311867e-75	FALSE	3.76932510326511e-73
CHEMBL428690	ALVOCIDIB	EFO_0003095	non-alcoholic fatty liver disease	4118	1226	273	64102	4.39783538004381	5.70408833618076e-75	FALSE	4.13351440416302e-73
CHEMBL1484	NICARDIPINE	EFO_0000289	bipolar disorder	897	5835	274	64102	4.5588495254219	5.76190189740763e-75	FALSE	4.17133590533788e-73
CHEMBL1287853	FEDRATINIB	EFO_0003095	non-alcoholic fatty liver disease	3684	1226	257	64102	4.60066248216549	9.3507775333293e-75	FALSE	6.76290883879825e-73
CHEMBL98	VORINOSTAT	HP_0100543	cognitive impairment	4984	1411	329	64102	3.79046937666607	9.77055110071815e-75	FALSE	7.0596275017409e-73
CHEMBL483254	PANOBINOSTAT	EFO_0000384	Crohn's disease	2060	3430	333	64102	3.66947726306707	1.37733238920493e-74	FALSE	9.94211575301089e-73
CHEMBL1908360	EVEROLIMUS	EFO_0000249	Alzheimers disease	1590	3757	301	64102	3.9903429522291	1.53274323123259e-74	FALSE	1.10470376172091e-72
CHEMBL428690	ALVOCIDIB	EFO_0005306	ventricular tachycardia	4118	1359	289	64102	4.15570198919875	1.53338033093799e-74	FALSE	1.10470376172091e-72
CHEMBL608533	MIDOSTAURIN	EFO_0000692	schizophrenia	1525	5048	347	64102	3.62632939849834	1.82219223217376e-74	FALSE	1.31150120842341e-72
CHEMBL402548	Danusertib	EFO_0001073	obesity	956	7209	318	64102	4.06925220957324	1.82520422005607e-74	FALSE	1.31239611578741e-72
CHEMBL2103875	TRAMETINIB	EFO_0003869	breast neoplasm	2703	2205	302	64102	3.93242316795587	1.8496056586051e-74	FALSE	1.32865428748104e-72
CHEMBL300138	ENZASTAURIN	EFO_0000692	schizophrenia	1294	5048	314	64102	3.9308564009105	1.98448270225102e-74	FALSE	1.42416381934755e-72
CHEMBL2105737	SONIDEGIB	EFO_0000537	hypertension	911	6014	280	64102	4.44643385469863	2.36850868614372e-74	FALSE	1.69811774932652e-72
CHEMBL121	ROSIGLITAZONE	EFO_0003761	unipolar depression	1109	4304	263	64102	4.53500837480689	2.3783973583062e-74	FALSE	1.70356154414201e-72
CHEMBL506871	VELIPARIB	EFO_0003885	multiple sclerosis	1046	4889	272	64102	4.44794883257547	2.59886590806439e-74	FALSE	1.85968027683624e-72
CHEMBL428690	ALVOCIDIB	EFO_0000612	myocardial infarction	4118	1504	306	64102	3.93915306347427	3.82211628171254e-74	FALSE	2.73237127827051e-72
CHEMBL1201129	DECITABINE	EFO_0000289	bipolar disorder	843	5835	263	64102	4.69441739284841	3.8754548313632e-74	FALSE	2.76783566661507e-72
CHEMBL180022	NERATINIB	EFO_0001645	coronary heart disease	3106	2120	319	64102	3.7622517586363	4.14059781910056e-74	FALSE	2.95435635736882e-72
CHEMBL1173655	AFATINIB	EFO_0001359	type I diabetes mellitus	1170	5458	308	64102	4.00916984004168	4.83031841762488e-74	FALSE	3.4431678979813e-72
CHEMBL1230609	FORETINIB	Orphanet_84	Fanconi anemia	2302	3761	375	64102	3.35710082551004	4.83626929834055e-74	FALSE	3.44410137508024e-72
CHEMBL1512	FLUNISOLIDE	EFO_0000537	hypertension	958	6014	288	64102	4.3104253852991	4.96284409319601e-74	FALSE	3.53085183063864e-72
CHEMBL402548	Danusertib	EFO_0000289	bipolar disorder	956	5835	283	64102	4.36214612732355	5.23037836461363e-74	FALSE	3.71762669105512e-72
CHEMBL483254	PANOBINOSTAT	Orphanet_84	Fanconi anemia	2060	3761	350	64102	3.51805009732357	8.06546038481779e-74	FALSE	5.72724868761152e-72
CHEMBL1489	AZACITIDINE	Orphanet_84	Fanconi anemia	2070	3761	351	64102	3.51012120371493	8.37151029284026e-74	FALSE	5.93889026080508e-72
CHEMBL288441	BOSUTINIB	EFO_0000378	coronary artery disease	1594	3553	291	64102	4.05622012622332	8.56015798951052e-74	FALSE	6.06691999629062e-72
CHEMBL223360	LINIFANIB	EFO_0001645	coronary heart disease	3168	2120	322	64102	3.72146217053048	9.83859523688552e-74	FALSE	6.96634503390353e-72
CHEMBL402548	Danusertib	EFO_0000537	hypertension	956	6014	287	64102	4.30120933465485	1.26735812615084e-73	FALSE	8.96513915643688e-72
CHEMBL1230609	FORETINIB	EFO_0002614	insulin resistance	2302	2330	283	64102	4.09144485748986	1.73706231075691e-73	FALSE	1.22760675018777e-71
CHEMBL1491	AMLODIPINE	EFO_0001359	type I diabetes mellitus	1133	5458	301	64102	4.05588045758884	2.31005209579635e-73	FALSE	1.63099348971045e-71
CHEMBL98	VORINOSTAT	EFO_0001060	celiac disease	4984	1164	291	64102	4.13709583673935	2.41640042101212e-73	FALSE	1.70445811065784e-71
CHEMBL121	ROSIGLITAZONE	EFO_0001359	type I diabetes mellitus	1109	5458	297	64102	4.09875429951711	2.91057871118314e-73	FALSE	2.05108730544487e-71
CHEMBL1171837	PONATINIB	EFO_0000685	rheumatoid arthritis	1865	3417	311	64102	3.81017971403147	3.12800703562139e-73	FALSE	2.20221785653022e-71
CHEMBL865	VALDECOXIB	EFO_0000378	coronary artery disease	1757	3553	307	64102	3.85496760461646	3.23906090483817e-73	FALSE	2.27824184306651e-71
CHEMBL1231160	PEVONEDISTAT	EFO_0003869	breast neoplasm	2455	2205	284	64102	4.0670623276208	3.26070697795599e-73	FALSE	2.29129508806084e-71
CHEMBL402548	Danusertib	EFO_0003758	autism	956	5501	273	64102	4.42807181803846	3.52601756203014e-73	FALSE	2.47538441996638e-71
CHEMBL939	GEFITINIB	EFO_0000673	prostate adenocarcinoma	2112	3249	325	64102	3.67334456525108	3.68404481224284e-73	FALSE	2.58388039028809e-71
CHEMBL1078983	AZD-2014	EFO_0002614	insulin resistance	2110	2330	269	64102	4.2486787022977	3.88161024824429e-73	FALSE	2.71987618952755e-71
CHEMBL272980	MOCETINOSTAT	EFO_0000253	amyotrophic lateral sclerosis	2992	2437	337	64102	3.56640521453427	4.73399334247701e-73	FALSE	3.31401864130666e-71
CHEMBL1173655	AFATINIB	EFO_0003885	multiple sclerosis	1170	4889	288	64102	4.13979271510125	7.95967733455782e-73	FALSE	5.56689780029089e-71
CHEMBL608533	MIDOSTAURIN	EFO_0003761	unipolar depression	1525	4304	314	64102	3.80671476077557	8.25207631144476e-73	FALSE	5.76596349049679e-71
CHEMBL288441	BOSUTINIB	EFO_0000195	metabolic syndrome	1594	3177	272	64102	4.22128628098898	8.86097703956783e-73	FALSE	6.18559549596548e-71
CHEMBL98	VORINOSTAT	EFO_0005429	borderline personality disorder symptom	4984	1205	296	64102	4.04341054561416	1.03297992374408e-72	FALSE	7.19739673628446e-71
CHEMBL1879463	DACTOLISIB	EFO_0005306	ventricular tachycardia	3807	1359	274	64102	4.23215832473027	1.03823247436082e-72	FALSE	7.22720832644885e-71
CHEMBL98	VORINOSTAT	EFO_0003882	osteoporosis	4984	916	252	64102	4.68797122757362	1.38269412336538e-72	FALSE	9.6160091306774e-71
CHEMBL325041	BORTEZOMIB	EFO_0000270	asthma	2931	2121	306	64102	3.81235338259909	1.46718792484509e-72	FALSE	1.01940711575965e-70
CHEMBL554	LAPATINIB	EFO_0000673	prostate adenocarcinoma	1865	3249	301	64102	3.87068708526976	1.62653221095112e-72	FALSE	1.12906288787304e-70
CHEMBL1421	DASATINIB	HP_0100543	cognitive impairment	4246	1411	297	64102	3.96596778171021	1.80349720757291e-72	FALSE	1.25073374100886e-70
CHEMBL506871	VELIPARIB	EFO_0000289	bipolar disorder	1046	5835	296	64102	4.09841478874823	2.14836409302134e-72	FALSE	1.48850940730764e-70
CHEMBL1171837	PONATINIB	EFO_0000384	Crohn's disease	1865	3430	310	64102	3.77760552368465	2.92632691396409e-72	FALSE	2.02563515532374e-70
CHEMBL14762	SELICICLIB	EFO_0000692	schizophrenia	1650	5048	360	64102	3.43848714407203	3.81358704530018e-72	FALSE	2.63734600835508e-70
CHEMBL1201129	DECITABINE	EFO_0000537	hypertension	843	6014	264	64102	4.56022429214908	4.83718931188501e-72	FALSE	3.34211948685686e-70
CHEMBL576982	QUIZARTINIB	EFO_0000537	hypertension	976	6014	288	64102	4.19641624416293	5.22983852597239e-72	FALSE	3.61004807274215e-70
CHEMBL98	VORINOSTAT	EFO_0003767	inflammatory bowel disease	4984	1438	328	64102	3.6812176001998	5.43524491140761e-72	FALSE	3.74834896515801e-70
CHEMBL288441	BOSUTINIB	EFO_0000692	schizophrenia	1594	5048	352	64102	3.48895873564653	5.91436494832652e-72	FALSE	4.0749809748428e-70
CHEMBL1879463	DACTOLISIB	EFO_0000612	myocardial infarction	3807	1504	289	64102	3.99459997443969	9.02346612856663e-72	FALSE	6.2113757334906e-70
CHEMBL554	LAPATINIB	EFO_0002508	Parkinson's disease	1865	3371	306	64102	3.78953478633464	1.02971817083006e-71	FALSE	7.08157894962415e-70
CHEMBL14762	SELICICLIB	EFO_0000685	rheumatoid arthritis	1650	3417	287	64102	3.99079422934153	1.12178675316348e-71	FALSE	7.70760981652739e-70
CHEMBL2216870	IDELALISIB	EFO_0000289	bipolar disorder	1030	5835	292	64102	4.10665669761413	1.29401521242929e-71	FALSE	8.88273809790155e-70
CHEMBL2216870	IDELALISIB	EFO_0001073	obesity	1030	7209	328	64102	3.81504759949878	1.75361683604907e-71	FALSE	1.20265376450112e-69
CHEMBL408513	BELINOSTAT	EFO_0001365	age-related macular degeneration	3180	2123	319	64102	3.65343956491091	1.76881878382179e-71	FALSE	1.21195935229451e-69
CHEMBL521686	OLAPARIB	EFO_0000384	Crohn's disease	1599	3430	282	64102	4.03723460675576	2.04613978926687e-71	FALSE	1.40068084006041e-69
CHEMBL1423	PIMOZIDE	HP_0003124	hypercholesterolemia	1360	4983	316	64102	3.76607883650236	2.11384409513635e-71	FALSE	1.44569401916676e-69
CHEMBL507361	PD-0325901	HP_0000545	Myopia	4217	1322	283	64102	4.07435317287341	2.1974859076762e-71	FALSE	1.50151419686107e-69
CHEMBL1423	PIMOZIDE	EFO_0003761	unipolar depression	1360	4304	291	64102	3.98395175403512	2.27189187387415e-71	FALSE	1.5509267387381e-69
CHEMBL2216870	IDELALISIB	EFO_0003885	multiple sclerosis	1030	4889	265	64102	4.37853003597782	2.41903423236508e-71	FALSE	1.64985694129275e-69
CHEMBL14762	SELICICLIB	EFO_0000249	Alzheimers disease	1650	3757	302	64102	3.82582950158653	3.03333086837902e-71	FALSE	2.06692669502355e-69
CHEMBL445813	AT-7519	EFO_0003095	non-alcoholic fatty liver disease	3979	1226	262	64102	4.32553274828582	4.42377816675803e-71	FALSE	3.01161888866312e-69
CHEMBL1079175	MK-2206	EFO_0000764	HIV infection	2937	1866	282	64102	3.99514256278773	4.91146507399045e-71	FALSE	3.34056155651202e-69
CHEMBL601719	CRIZOTINIB	EFO_0000253	amyotrophic lateral sclerosis	2617	2437	308	64102	3.71907886093618	5.81430352073766e-71	FALSE	3.95101092267709e-69
CHEMBL1614701	SELUMETINIB	EFO_0001365	age-related macular degeneration	3317	2123	326	64102	3.5775188133353	5.9478305500625e-71	FALSE	4.03804909393768e-69
CHEMBL223360	LINIFANIB	EFO_0003095	non-alcoholic fatty liver disease	3168	1226	232	64102	4.76416392723086	6.0897861164149e-71	FALSE	4.13064514413682e-69
CHEMBL576982	QUIZARTINIB	EFO_0001073	obesity	976	7209	316	64102	3.90539186919224	8.27347819213455e-71	FALSE	5.60669816664242e-69
CHEMBL2017974	BUPARLISIB	EFO_0003869	breast neoplasm	2439	2205	279	64102	4.00614385586911	8.30984228698088e-71	FALSE	5.62620298271365e-69
CHEMBL428690	ALVOCIDIB	EFO_0000764	HIV infection	4118	1866	342	64102	3.47418217442794	9.31717198543916e-71	FALSE	6.3024680690931e-69
CHEMBL1789941	RUXOLITINIB	HP_0003124	hypercholesterolemia	1263	4983	301	64102	3.88684735657909	1.07224910834143e-70	FALSE	7.24647040842218e-69
CHEMBL428690	ALVOCIDIB	HP_0100543	cognitive impairment	4118	1411	289	64102	3.95977171587953	1.13165802171934e-70	FALSE	7.64100850788752e-69
CHEMBL2028663	DABRAFENIB	EFO_0002508	Parkinson's disease	2117	3371	328	64102	3.55106543510203	1.18785303987818e-70	FALSE	8.01314862037819e-69
CHEMBL2216870	IDELALISIB	EFO_0001359	type I diabetes mellitus	1030	5458	280	64102	4.17425711026019	1.27082261363801e-70	FALSE	8.55729510390278e-69
CHEMBL223360	LINIFANIB	EFO_0000729	ulcerative colitis	3168	1773	285	64102	3.94931871644528	1.30634942486607e-70	FALSE	8.78854570010761e-69
CHEMBL503	LOVASTATIN	EFO_0001073	obesity	856	7209	291	64102	4.19381443214931	1.36461745172296e-70	FALSE	9.1722317033607e-69
CHEMBL1908394	GSK-461364	EFO_0002614	insulin resistance	2431	2330	287	64102	3.90691821073315	1.37750245656466e-70	FALSE	9.25045880446881e-69
CHEMBL939	GEFITINIB	EFO_0002614	insulin resistance	2112	2330	265	64102	4.16341790837947	1.50534003428389e-70	FALSE	1.00997972191714e-68
CHEMBL1484	NICARDIPINE	EFO_0003758	autism	897	5501	259	64102	4.48874582540786	1.54641400314585e-70	FALSE	1.03660028097053e-68
CHEMBL14762	SELICICLIB	EFO_0003761	unipolar depression	1650	4304	325	64102	3.6043247705987	1.95431228167601e-70	FALSE	1.3088424446008e-68
CHEMBL1614701	SELUMETINIB	HP_0000545	Myopia	3317	1322	247	64102	4.46867007750758	2.06628709571577e-70	FALSE	1.38258641963561e-68
CHEMBL1173655	AFATINIB	HP_0003124	hypercholesterolemia	1170	4983	287	64102	4.03091572250795	2.25137402314407e-70	FALSE	1.5050739584451e-68
CHEMBL1231160	PEVONEDISTAT	EFO_0001645	coronary heart disease	2455	2120	273	64102	4.05069189315041	2.78651057908136e-70	FALSE	1.86114327201379e-68
CHEMBL1879463	DACTOLISIB	EFO_0000712	stroke	3807	1475	283	64102	3.98191916750805	4.05805808528062e-70	FALSE	2.705554359553e-68
CHEMBL507361	PD-0325901	EFO_0000612	myocardial infarction	4217	1504	303	64102	3.78215042514184	5.52471882595795e-70	FALSE	3.68008761651894e-68
CHEMBL521851	PICTILISIB	EFO_0001645	coronary heart disease	3076	2120	310	64102	3.66616266255085	5.59813637097838e-70	FALSE	3.72564761801301e-68
CHEMBL1287853	FEDRATINIB	EFO_0000676	psoriasis	3684	1693	301	64102	3.7731334645626	5.95244266224802e-70	FALSE	3.95789433469637e-68
CHEMBL1614701	SELUMETINIB	EFO_0000712	stroke	3317	1475	262	64102	4.21170754147278	6.05014947456051e-70	FALSE	4.01925999784926e-68
CHEMBL2028663	DABRAFENIB	EFO_0002614	insulin resistance	2117	2330	264	64102	4.13186814159054	1.03182829359679e-69	FALSE	6.8485526409973e-68
CHEMBL502835	NINTEDANIB	EFO_0000253	amyotrophic lateral sclerosis	2163	2437	274	64102	4.00846257199056	1.09411678848157e-69	FALSE	7.25549028501117e-68
CHEMBL223360	LINIFANIB	EFO_0000764	HIV infection	3168	1866	292	64102	3.82912221574131	1.11888048880132e-69	FALSE	7.41308273852695e-68
CHEMBL1287853	FEDRATINIB	EFO_0000712	stroke	3684	1475	277	64102	4.01904178036717	1.38293952410665e-69	FALSE	9.15441814329476e-68
CHEMBL2103847	TOSEDOSTAT	EFO_0003869	breast neoplasm	2502	2205	281	64102	3.92416686729843	1.40437525965119e-69	FALSE	9.28802728542037e-68
CHEMBL428690	ALVOCIDIB	EFO_0002690	systemic lupus erythematosus	4118	1452	292	64102	3.87044786013648	1.5591339128037e-69	FALSE	1.03023626001424e-67
CHEMBL1473	FLUTICASONE PROPIONATE	EFO_0001073	obesity	822	7209	282	64102	4.24858805362614	2.04874877852183e-69	FALSE	1.35255696717271e-67
CHEMBL1491	AMLODIPINE	EFO_0003885	multiple sclerosis	1133	4889	277	64102	4.09469502144472	2.33761797656254e-69	FALSE	1.54189281734065e-67
CHEMBL1231160	PEVONEDISTAT	Orphanet_84	Fanconi anemia	2455	3761	381	64102	3.16671199666424	2.34479228233141e-69	FALSE	1.54525143259683e-67
CHEMBL1231160	PEVONEDISTAT	EFO_0000253	amyotrophic lateral sclerosis	2455	2437	294	64102	3.77768211937482	2.4985768049412e-69	FALSE	1.64513657329779e-67
CHEMBL1489	AZACITIDINE	EFO_0002614	insulin resistance	2070	2330	260	64102	4.16086501411874	2.81612122803224e-69	FALSE	1.85257336636642e-67
CHEMBL865	VALDECOXIB	Orphanet_84	Fanconi anemia	1757	3761	310	64102	3.65575374176679	3.67222417937543e-69	FALSE	2.41361731825114e-67
CHEMBL1456	MYCOPHENOLATE MOFETIL	EFO_0001073	obesity	712	7209	258	64102	4.61417861257303	4.08517039556221e-69	FALSE	2.68265547966986e-67
CHEMBL865	VALDECOXIB	EFO_0002508	Parkinson's disease	1757	3371	291	64102	3.81968794877819	4.45979957131537e-69	FALSE	2.92607804765214e-67
CHEMBL608533	MIDOSTAURIN	EFO_0000685	rheumatoid arthritis	1525	3417	270	64102	4.06279777340459	4.62876839329568e-69	FALSE	3.03425581823768e-67
CHEMBL1908360	EVEROLIMUS	EFO_0004211	Hypertriglyceridemia	1590	3627	286	64102	3.88452631733851	4.72386650741212e-69	FALSE	3.09386155500897e-67
CHEMBL121	ROSIGLITAZONE	EFO_0003885	multiple sclerosis	1109	4889	273	64102	4.12991509218047	4.8595338267046e-69	FALSE	3.17990923818884e-67
CHEMBL521851	PICTILISIB	EFO_0000712	stroke	3076	1475	250	64102	4.31839870519473	5.26625529348692e-69	FALSE	3.44301739253918e-67
CHEMBL1171837	PONATINIB	Orphanet_84	Fanconi anemia	1865	3761	321	64102	3.55331716465168	5.60087592863317e-69	FALSE	3.65856512574141e-67
CHEMBL189963	PALBOCICLIB	EFO_0000253	amyotrophic lateral sclerosis	2222	2437	277	64102	3.93749059026688	5.91725515576658e-69	FALSE	3.86182866168566e-67
CHEMBL1908360	EVEROLIMUS	EFO_0000685	rheumatoid arthritis	1590	3417	276	64102	3.97030972463729	1.06048188877425e-68	FALSE	6.91503150760048e-67
CHEMBL178	DAUNORUBICIN	EFO_0002508	Parkinson's disease	1724	3371	287	64102	3.84007884393375	1.28281575098865e-68	FALSE	8.3574488851723e-67
CHEMBL1879463	DACTOLISIB	EFO_0003095	non-alcoholic fatty liver disease	3807	1226	252	64102	4.31714582271202	1.31431048960235e-68	FALSE	8.55512367376685e-67
CHEMBL2107832	PIMASERTIB	EFO_0000537	hypertension	790	6014	249	64102	4.59427663554767	1.31944657456911e-68	FALSE	8.58102831427701e-67
CHEMBL1287853	FEDRATINIB	EFO_0000729	ulcerative colitis	3684	1773	307	64102	3.65534672385439	1.32571621447727e-68	FALSE	8.61425321324745e-67
CHEMBL1512	FLUNISOLIDE	EFO_0001359	type I diabetes mellitus	958	5458	265	64102	4.26736076820155	1.42404952502697e-68	FALSE	9.24510892428925e-67
CHEMBL121	ROSIGLITAZONE	EFO_0004211	Hypertriglyceridemia	1109	3627	232	64102	4.64366075570891	1.48240274284176e-68	FALSE	9.61553282627383e-67
CHEMBL1064	SIMVASTATIN	EFO_0003885	multiple sclerosis	1206	4889	286	64102	3.93715371728264	1.79934841125791e-68	FALSE	1.1661192039947e-66
CHEMBL121	ROSIGLITAZONE	EFO_0000289	bipolar disorder	1109	5835	300	64102	3.84901991674734	1.92328832625643e-68	FALSE	1.24535436518201e-66
CHEMBL572878	TOZASERTIB	EFO_0000270	asthma	2870	2121	295	64102	3.72734309711915	2.61977971945866e-68	FALSE	1.69486272085815e-66
CHEMBL1287853	FEDRATINIB	EFO_0000612	myocardial infarction	3684	1504	278	64102	3.94079860222187	2.71914782726771e-68	FALSE	1.75761641570035e-66
CHEMBL552212	LEXIBULIN	EFO_0000384	Crohn's disease	1991	3430	315	64102	3.55937718923215	3.27424132710984e-68	FALSE	2.11457856987107e-66
CHEMBL45816	MIBEFRADIL	EFO_0000537	hypertension	1058	6014	296	64102	3.89388744762736	3.47242348920325e-68	FALSE	2.24061900014197e-66
CHEMBL1421	DASATINIB	EFO_0005429	borderline personality disorder symptom	4246	1205	264	64102	4.15086440308088	3.62019569482976e-68	FALSE	2.33394110803512e-66
CHEMBL300138	ENZASTAURIN	HP_0003124	hypercholesterolemia	1294	4983	301	64102	3.76278218104136	4.02926061588623e-68	FALSE	2.59541045140484e-66
CHEMBL2103882	TIVANTINIB	EFO_0002508	Parkinson's disease	1591	3371	273	64102	3.97237972419163	4.33661453380766e-68	FALSE	2.79096688188376e-66
CHEMBL503	LOVASTATIN	EFO_0000289	bipolar disorder	856	5835	256	64102	4.41020165145984	5.50593858040961e-68	FALSE	3.54045210016721e-66
CHEMBL521686	OLAPARIB	Orphanet_84	Fanconi anemia	1599	3761	291	64102	3.78516041067525	6.00203556100466e-68	FALSE	3.85611297666105e-66
CHEMBL217092	SARACATINIB	EFO_0001645	coronary heart disease	2438	2120	268	64102	3.98852698299881	6.77871276988491e-68	FALSE	4.35133547655112e-66
CHEMBL288441	BOSUTINIB	EFO_0000685	rheumatoid arthritis	1594	3417	275	64102	3.93937284268988	7.32353534232297e-68	FALSE	4.69700034638787e-66
CHEMBL521851	PICTILISIB	EFO_0000764	HIV infection	3076	1866	284	64102	3.82226003753785	7.87084555140607e-68	FALSE	5.04366229829091e-66
CHEMBL1751	DIGOXIN	EFO_0000673	prostate adenocarcinoma	1932	3249	299	64102	3.67515798534513	9.20708790403777e-68	FALSE	5.89484001655843e-66
CHEMBL45816	MIBEFRADIL	EFO_0001073	obesity	1058	7209	327	64102	3.65043211179923	9.84716984522592e-68	FALSE	6.29921757211197e-66
CHEMBL1479	DANAZOL	EFO_0000537	hypertension	677	6014	226	64102	4.9898441509797	1.70729794826832e-67	FALSE	1.09121485143196e-65
CHEMBL223360	LINIFANIB	EFO_0001365	age-related macular degeneration	3168	2123	311	64102	3.55149260408904	2.0973335108334e-67	FALSE	1.33935140422885e-65
CHEMBL552212	LEXIBULIN	Orphanet_84	Fanconi anemia	1991	3761	331	64102	3.41120552672888	2.28943839996855e-67	FALSE	1.46077193869017e-65
CHEMBL576982	QUIZARTINIB	EFO_0001359	type I diabetes mellitus	976	5458	266	64102	4.18054463889572	2.32785939518693e-67	FALSE	1.48401036443167e-65
CHEMBL1173655	AFATINIB	EFO_0000692	schizophrenia	1170	5048	284	64102	3.91408672668114	2.41903008946241e-67	FALSE	1.54080796385028e-65
CHEMBL1513	IRBESARTAN	EFO_0001073	obesity	956	7209	306	64102	3.83517313304181	2.71840823021926e-67	FALSE	1.73001271632436e-65
CHEMBL939	GEFITINIB	Orphanet_84	Fanconi anemia	2112	3761	343	64102	3.32253040695612	3.01835748096186e-67	FALSE	1.91925635711032e-65
CHEMBL603469	LESTAURTINIB	EFO_0000384	Crohn's disease	1691	3430	284	64102	3.80267474700249	4.07092183340832e-67	FALSE	2.58632495417863e-65
CHEMBL1513	IRBESARTAN	EFO_0000289	bipolar disorder	956	5835	272	64102	4.11640077496694	4.26114854011036e-67	FALSE	2.70486336543105e-65
CHEMBL1473	FLUTICASONE PROPIONATE	EFO_0001359	type I diabetes mellitus	822	5458	240	64102	4.58843239432288	4.46332602887283e-67	FALSE	2.83077870061973e-65
CHEMBL1512	FLUNISOLIDE	EFO_0001073	obesity	958	7209	306	64102	3.82328423233724	4.66316587847264e-67	FALSE	2.95499764314314e-65
CHEMBL1423	PIMOZIDE	EFO_0000249	Alzheimers disease	1360	3757	263	64102	4.06537331561593	4.92744295066873e-67	FALSE	3.11980293647076e-65
CHEMBL1287853	FEDRATINIB	EFO_0005306	ventricular tachycardia	3684	1359	260	64102	4.09857307168175	5.36108337548313e-67	FALSE	3.39146796144694e-65
CHEMBL603469	LESTAURTINIB	EFO_0002614	insulin resistance	1691	2330	229	64102	4.49587522070123	6.3633729829497e-67	FALSE	4.0220961856881e-65
CHEMBL608533	MIDOSTAURIN	EFO_0000384	Crohn's disease	1525	3430	267	64102	3.98678967729775	6.71366544310764e-67	FALSE	4.23989399324087e-65
CHEMBL603469	LESTAURTINIB	Orphanet_84	Fanconi anemia	1691	3761	299	64102	3.65712401558529	6.75427531926505e-67	FALSE	4.26191326586788e-65
CHEMBL865	VALDECOXIB	EFO_0000384	Crohn's disease	1757	3430	290	64102	3.7267909036208	7.79069310393863e-67	FALSE	4.91171097517218e-65
CHEMBL408513	BELINOSTAT	HP_0000545	Myopia	3180	1322	236	64102	4.41660241451863	8.2840702787409e-67	FALSE	5.21833136701162e-65
CHEMBL1491	AMLODIPINE	EFO_0004211	Hypertriglyceridemia	1133	3627	232	64102	4.51815741269127	1.02918448224306e-66	FALSE	6.47757714205649e-65
CHEMBL1614701	SELUMETINIB	EFO_0005306	ventricular tachycardia	3317	1359	245	64102	4.2717689311894	1.13145815911577e-66	FALSE	7.11524175399878e-65
CHEMBL98	VORINOSTAT	EFO_0003819	dental caries	4984	1116	273	64102	4.00614371634044	1.17478121818137e-66	FALSE	7.38142593523695e-65
CHEMBL572881	MOTESANIB	EFO_0000537	hypertension	710	6014	231	64102	4.80395713045107	1.37618760194588e-66	FALSE	8.63959399343433e-65
CHEMBL2017974	BUPARLISIB	EFO_0000253	amyotrophic lateral sclerosis	2439	2437	288	64102	3.70811822362686	1.62041511711553e-66	FALSE	1.01642353140793e-64
CHEMBL180022	NERATINIB	EFO_0000612	myocardial infarction	3106	1504	250	64102	4.1701439546726	1.9310936111424e-66	FALSE	1.21027703897654e-64
CHEMBL1751	DIGOXIN	EFO_0002508	Parkinson's disease	1932	3371	303	64102	3.582910205986	2.17473553645251e-66	FALSE	1.36182489858615e-64
CHEMBL507361	PD-0325901	EFO_0005429	borderline personality disorder symptom	4217	1205	260	64102	4.09816411591291	2.62542281570625e-66	FALSE	1.64266020269378e-64
CHEMBL1789941	RUXOLITINIB	EFO_0004211	Hypertriglyceridemia	1263	3627	246	64102	4.25369934590986	2.94406786520027e-66	FALSE	1.84047646113889e-64
CHEMBL2103882	TIVANTINIB	EFO_0000195	metabolic syndrome	1591	3177	261	64102	4.01059410888975	3.49020716666382e-66	FALSE	2.1800574309957e-64
CHEMBL2105737	SONIDEGIB	EFO_0001073	obesity	911	7209	295	64102	3.89746874016272	3.73179810892443e-66	FALSE	2.32899982062857e-64
CHEMBL223360	LINIFANIB	EFO_0000676	psoriasis	3168	1693	270	64102	3.89642537580355	4.15567495534035e-66	FALSE	2.59136016858009e-64
CHEMBL217092	SARACATINIB	EFO_0003869	breast neoplasm	2438	2205	271	64102	3.86230421552132	4.46693309606988e-66	FALSE	2.78311310154379e-64
CHEMBL1473	FLUTICASONE PROPIONATE	EFO_0000289	bipolar disorder	822	5835	247	64102	4.43492055967127	4.58662806465099e-66	FALSE	2.85529140551532e-64
CHEMBL255863	NILOTINIB	Orphanet_84	Fanconi anemia	2045	3761	334	64102	3.33954174225814	4.6404802917319e-66	FALSE	2.88639430048588e-64
CHEMBL507361	PD-0325901	HP_0100543	cognitive impairment	4217	1411	285	64102	3.78188951646293	4.64608340576797e-66	FALSE	2.88745912165002e-64
CHEMBL1241855	RIGOSERTIB	EFO_0000384	Crohn's disease	1885	3430	301	64102	3.58816787628089	4.68451840009085e-66	FALSE	2.90890952199784e-64
CHEMBL2103875	TRAMETINIB	EFO_0000270	asthma	2703	2121	281	64102	3.75560364200279	5.44653073639407e-66	FALSE	3.37926265296088e-64
CHEMBL503	LOVASTATIN	EFO_0000537	hypertension	856	6014	257	64102	4.28452720768995	5.51308064372933e-66	FALSE	3.41769548177055e-64
CHEMBL506871	VELIPARIB	EFO_0003758	autism	1046	5501	276	64102	3.9675686983498	7.02337928375543e-66	FALSE	4.35033271912413e-64
CHEMBL223360	LINIFANIB	EFO_0000712	stroke	3168	1475	249	64102	4.15427805101329	7.42452230373815e-66	FALSE	4.59496811967381e-64
CHEMBL1879463	DACTOLISIB	EFO_0003882	osteoporosis	3807	916	210	64102	4.92722703701742	9.49045605705658e-66	FALSE	5.86866076428236e-64
CHEMBL1287853	FEDRATINIB	EFO_0001060	celiac disease	3684	1164	236	64102	4.38757243524106	9.83850780845235e-66	FALSE	6.07882158140056e-64
CHEMBL2028663	DABRAFENIB	EFO_0000253	amyotrophic lateral sclerosis	2117	2437	264	64102	3.92149820524292	1.14650460067401e-65	FALSE	7.0779013222142e-64
CHEMBL180022	NERATINIB	EFO_0000712	stroke	3106	1475	246	64102	4.18278153521531	1.16596323758842e-65	FALSE	7.1920450577929e-64
CHEMBL576982	QUIZARTINIB	EFO_0004211	Hypertriglyceridemia	976	3627	212	64102	4.85151444034696	1.18709251464161e-65	FALSE	7.31629568513128e-64
CHEMBL108	CARBAMAZEPINE	EFO_0000537	hypertension	728	6014	233	64102	4.68927834846313	1.21138872239087e-65	FALSE	7.45984233568586e-64
CHEMBL865	VALDECOXIB	EFO_0000673	prostate adenocarcinoma	1757	3249	279	64102	3.77401496511078	1.37907143221051e-65	FALSE	8.48540593923558e-64
CHEMBL2103875	TRAMETINIB	EFO_0000253	amyotrophic lateral sclerosis	2703	2437	304	64102	3.52066567686697	1.80029234980759e-65	FALSE	1.10496851792781e-63
CHEMBL2017974	BUPARLISIB	EFO_0001645	coronary heart disease	2439	2120	264	64102	3.91124035021241	1.81806828446056e-65	FALSE	1.11495666982145e-63
CHEMBL1171837	PONATINIB	EFO_0002508	Parkinson's disease	1865	3371	295	64102	3.61353943413935	1.89395785716821e-65	FALSE	1.16053792560832e-63
CHEMBL1879463	DACTOLISIB	HP_0000545	Myopia	3807	1322	258	64102	4.04691553474844	1.92038864563727e-65	FALSE	1.17576270172866e-63
CHEMBL217092	SARACATINIB	EFO_0000253	amyotrophic lateral sclerosis	2438	2437	286	64102	3.67721587172855	2.03120023857218e-65	FALSE	1.24258214099958e-63
CHEMBL1229517	VEMURAFENIB	EFO_0000712	stroke	2910	1475	237	64102	4.29367678987225	2.11185765111102e-65	FALSE	1.29085994234508e-63
CHEMBL506871	VELIPARIB	EFO_0001359	type I diabetes mellitus	1046	5458	274	64102	3.96249503595807	2.13725890540833e-65	FALSE	1.30531108704383e-63
CHEMBL1751	DIGOXIN	Orphanet_84	Fanconi anemia	1932	3761	321	64102	3.40169677348149	3.08427702083653e-65	FALSE	1.88214454219716e-63
CHEMBL180022	NERATINIB	EFO_0000764	HIV infection	3106	1866	281	64102	3.72869235187099	3.45309465334314e-65	FALSE	2.10547977609965e-63
CHEMBL1229517	VEMURAFENIB	EFO_0001365	age-related macular degeneration	2910	2123	292	64102	3.6155706285302	3.5035659154939e-65	FALSE	2.13450007191482e-63
CHEMBL1263	SALMETEROL	EFO_0000537	hypertension	706	6014	228	64102	4.74912147767591	4.6230536012841e-65	FALSE	2.81422225170867e-63
CHEMBL223360	LINIFANIB	EFO_0005429	borderline personality disorder symptom	3168	1205	221	64102	4.56897054234609	5.16556451827509e-65	FALSE	3.14189110720167e-63
CHEMBL601719	CRIZOTINIB	EFO_0000270	asthma	2617	2121	274	64102	3.77614009563554	6.21753773152239e-65	FALSE	3.77738637926139e-63
CHEMBL939	GEFITINIB	EFO_0002508	Parkinson's disease	2112	3371	317	64102	3.40793251971697	6.22055947100251e-65	FALSE	3.77738637926139e-63
CHEMBL1421	DASATINIB	EFO_0002690	systemic lupus erythematosus	4246	1452	289	64102	3.68552014882895	7.0350104174431e-65	FALSE	4.26846237143389e-63
CHEMBL27759	ENTINOSTAT	EFO_0001365	age-related macular degeneration	2971	2123	295	64102	3.57600091733698	7.21096212846123e-65	FALSE	4.37164579037962e-63
CHEMBL325041	BORTEZOMIB	EFO_0000712	stroke	2931	1475	237	64102	4.25872260477527	8.14769284056024e-65	FALSE	4.9355065080308e-63
CHEMBL1229517	VEMURAFENIB	EFO_0001645	coronary heart disease	2910	2120	291	64102	3.60589231213497	9.26514708877392e-65	FALSE	5.60783229789942e-63
CHEMBL502835	NINTEDANIB	EFO_0003869	breast neoplasm	2163	2205	251	64102	4.02986277693924	1.0047405840207e-64	FALSE	6.07634678380247e-63
CHEMBL552212	LEXIBULIN	EFO_0002614	insulin resistance	1991	2330	247	64102	4.08131670569367	1.12106997925533e-64	FALSE	6.77434835591542e-63
CHEMBL14762	SELICICLIB	EFO_0000195	metabolic syndrome	1650	3177	264	64102	3.89324018137459	1.14392814590049e-64	FALSE	6.9068501274651e-63
CHEMBL521686	OLAPARIB	EFO_0002508	Parkinson's disease	1599	3371	268	64102	3.85459807083853	1.19046380354886e-64	FALSE	7.18198101970271e-63
CHEMBL408513	BELINOSTAT	EFO_0003095	non-alcoholic fatty liver disease	3180	1226	223	64102	4.50503048112489	1.23629685557643e-64	FALSE	7.45242958310714e-63
CHEMBL325041	BORTEZOMIB	EFO_0001645	coronary heart disease	2931	2120	292	64102	3.59164699224942	1.23843383580182e-64	FALSE	7.45925184948654e-63
CHEMBL1473	FLUTICASONE PROPIONATE	EFO_0003885	multiple sclerosis	822	4889	223	64102	4.67646358244621	1.39125848597856e-64	FALSE	8.37293884444763e-63
CHEMBL1241855	RIGOSERTIB	EFO_0002508	Parkinson's disease	1885	3371	295	64102	3.56697041835	2.1167321455293e-64	FALSE	1.27286960177473e-62
CHEMBL1421	DASATINIB	EFO_0003882	osteoporosis	4246	916	220	64102	4.64460779468873	2.58634614356169e-64	FALSE	1.55400660391089e-62
CHEMBL1171837	PONATINIB	EFO_0000195	metabolic syndrome	1865	3177	283	64102	3.6677277614666	2.76200186946385e-64	FALSE	1.65820670488321e-62
CHEMBL1908360	EVEROLIMUS	EFO_0000673	prostate adenocarcinoma	1590	3249	261	64102	3.91233084988553	2.80684898487249e-64	FALSE	1.68376902928426e-62
CHEMBL255863	NILOTINIB	EFO_0002614	insulin resistance	2045	2330	250	64102	4.01591837496048	3.23210488171635e-64	FALSE	1.93730486872183e-62
CHEMBL2107832	PIMASERTIB	EFO_0003758	autism	790	5501	231	64102	4.55115674313329	4.31276129130723e-64	FALSE	2.58295764020543e-62
CHEMBL2028663	DABRAFENIB	EFO_0000673	prostate adenocarcinoma	2117	3249	309	64102	3.43226156832585	4.36675818173803e-64	FALSE	2.61318782964411e-62
CHEMBL27759	ENTINOSTAT	EFO_0000764	HIV infection	2971	1866	272	64102	3.76432982717726	4.54063091098374e-64	FALSE	2.71504848307452e-62
CHEMBL1241855	RIGOSERTIB	Orphanet_84	Fanconi anemia	1885	3761	314	64102	3.40762959481311	4.63951781063667e-64	FALSE	2.77194379338401e-62
CHEMBL272980	MOCETINOSTAT	EFO_0003095	non-alcoholic fatty liver disease	2992	1226	215	64102	4.60206285454217	5.12956868551448e-64	FALSE	3.06226584319068e-62
CHEMBL2105737	SONIDEGIB	EFO_0001359	type I diabetes mellitus	911	5458	250	64102	4.21091938231403	5.63121992984893e-64	FALSE	3.35904079497138e-62
CHEMBL1423	PIMOZIDE	EFO_0000195	metabolic syndrome	1360	3177	235	64102	4.24579156751472	7.54266798405088e-64	FALSE	4.49561186953009e-62
CHEMBL2107832	PIMASERTIB	HP_0003124	hypercholesterolemia	790	4983	219	64102	4.71336365011529	8.32069908383818e-64	FALSE	4.95535694635804e-62
CHEMBL1614701	SELUMETINIB	EFO_0000676	psoriasis	3317	1693	273	64102	3.74966628156557	1.01223079197679e-63	FALSE	6.02346318513537e-62
CHEMBL1751	DIGOXIN	EFO_0003869	breast neoplasm	1932	2205	234	64102	4.20884409666796	1.06534962331875e-63	FALSE	6.33447666653589e-62
CHEMBL572878	TOZASERTIB	EFO_0001365	age-related macular degeneration	2870	2123	287	64102	3.59415970029461	1.06639596722276e-63	FALSE	6.33562151703484e-62
CHEMBL180022	NERATINIB	EFO_0000729	ulcerative colitis	3106	1773	270	64102	3.7686838140076	1.2689690206902e-63	FALSE	7.52708602560485e-62
CHEMBL2103847	TOSEDOSTAT	EFO_0000253	amyotrophic lateral sclerosis	2502	2437	287	64102	3.58236492181594	1.55136077100424e-63	FALSE	9.1947864227132e-62
CHEMBL1484	NICARDIPINE	EFO_0001359	type I diabetes mellitus	897	5458	247	64102	4.22914821534252	1.57548290308062e-63	FALSE	9.33030397630469e-62
CHEMBL445813	AT-7519	EFO_0000612	myocardial infarction	3979	1504	282	64102	3.67629457125502	1.65346903480141e-63	FALSE	9.78434367842414e-62
CHEMBL1489	AZACITIDINE	EFO_0000253	amyotrophic lateral sclerosis	2070	2437	257	64102	3.89184213102193	1.67945635323561e-63	FALSE	9.93020387982854e-62
CHEMBL506871	VELIPARIB	EFO_0001073	obesity	1046	7209	317	64102	3.54348775960878	1.8225683204551e-63	FALSE	1.07678090938989e-61
CHEMBL272980	MOCETINOSTAT	EFO_0000764	HIV infection	2992	1866	272	64102	3.73399616128047	1.94844482464426e-63	FALSE	1.15023347822377e-61
CHEMBL1908394	GSK-461364	EFO_0003869	breast neoplasm	2431	2205	266	64102	3.7849670531537	2.04268902256558e-63	FALSE	1.20491048425659e-61
CHEMBL576982	QUIZARTINIB	HP_0003124	hypercholesterolemia	976	4983	247	64102	4.17736748680863	2.0747491549042e-63	FALSE	1.22284957140322e-61
CHEMBL288441	BOSUTINIB	EFO_0000384	Crohn's disease	1594	3430	268	64102	3.7935751772833	2.12359153629461e-63	FALSE	1.25064372976779e-61
CHEMBL1289494	TIVOZANIB	EFO_0000270	asthma	2141	2121	242	64102	4.07467012524248	2.19197393960813e-63	FALSE	1.2898923567694e-61
CHEMBL1287853	FEDRATINIB	HP_0000545	Myopia	3684	1322	250	64102	4.03031964306682	2.1950235001846e-63	FALSE	1.29066338218065e-61
CHEMBL1614701	SELUMETINIB	EFO_0000612	myocardial infarction	3317	1504	254	64102	3.94961519636879	2.77794103235929e-63	FALSE	1.63212283694553e-61
CHEMBL1512	FLUNISOLIDE	EFO_0000289	bipolar disorder	958	5835	266	64102	3.9743495966398	3.05358341471587e-63	FALSE	1.79265156083062e-61
CHEMBL300138	ENZASTAURIN	EFO_0003761	unipolar depression	1294	4304	269	64102	3.82207426073129	3.13505316030383e-63	FALSE	1.83902466213712e-61
CHEMBL1173655	AFATINIB	EFO_0000195	metabolic syndrome	1170	3177	215	64102	4.55795545544967	3.45447139414216e-63	FALSE	2.02479502213522e-61
CHEMBL180022	NERATINIB	EFO_0003095	non-alcoholic fatty liver disease	3106	1226	218	64102	4.49204111644191	3.61941569766351e-63	FALSE	2.11980064597569e-61
CHEMBL1879463	DACTOLISIB	EFO_0000729	ulcerative colitis	3807	1773	303	64102	3.46025076966098	3.62808919527358e-63	FALSE	2.12320472188703e-61
CHEMBL2103847	TOSEDOSTAT	EFO_0000270	asthma	2502	2121	264	64102	3.79514438483973	3.63863004532952e-63	FALSE	2.12769537047815e-61
CHEMBL502835	NINTEDANIB	EFO_0000270	asthma	2163	2121	243	64102	4.04750560442517	3.80434903868786e-63	FALSE	2.22284819225065e-61
CHEMBL217092	SARACATINIB	EFO_0000712	stroke	2438	1475	212	64102	4.55393717609269	4.81075519848434e-63	FALSE	2.80867104251401e-61
CHEMBL2103882	TIVANTINIB	EFO_0000384	Crohn's disease	1591	3430	267	64102	3.78407382036752	5.42808796113753e-63	FALSE	3.16659801223436e-61
CHEMBL576982	QUIZARTINIB	EFO_0003758	autism	976	5501	260	64102	4.01088025967018	5.48215558503608e-63	FALSE	3.19562729919562e-61
CHEMBL45816	MIBEFRADIL	EFO_0003758	autism	1058	5501	273	64102	3.84547382389081	5.64644183246108e-63	FALSE	3.28880860422115e-61
CHEMBL98	VORINOSTAT	EFO_0000319	cardiovascular disease	4984	994	249	64102	4.12046778570441	5.69061740262701e-63	FALSE	3.31193932832892e-61
CHEMBL1479	DANAZOL	EFO_0001073	obesity	677	7209	241	64102	4.47862874299696	6.45884345151243e-63	FALSE	3.75610092726865e-61
CHEMBL1491	AMLODIPINE	EFO_0000692	schizophrenia	1133	5048	271	64102	3.82925001981658	7.48693870605812e-63	FALSE	4.35057389728303e-61
CHEMBL601719	CRIZOTINIB	EFO_0000764	HIV infection	2617	1866	251	64102	3.93271586143503	8.0922564299479e-63	FALSE	4.69863762429017e-61
CHEMBL180022	NERATINIB	EFO_0001365	age-related macular degeneration	3106	2123	299	64102	3.45545060784123	8.48133095711254e-63	FALSE	4.92069713582905e-61
CHEMBL603469	LESTAURTINIB	EFO_0000673	prostate adenocarcinoma	1691	3249	268	64102	3.75495083834439	8.51966523921783e-63	FALSE	4.93907624278249e-61
CHEMBL255863	NILOTINIB	EFO_0003869	breast neoplasm	2045	2205	240	64102	4.06605457523396	9.46359359990381e-63	FALSE	5.48201376331664e-61
CHEMBL608533	MIDOSTAURIN	EFO_0000195	metabolic syndrome	1525	3177	249	64102	3.97540956139211	1.04085531745511e-62	FALSE	6.02470115692327e-61
CHEMBL521851	PICTILISIB	EFO_0005306	ventricular tachycardia	3076	1359	229	64102	4.26335192469114	1.07300370254813e-62	FALSE	6.2059423030073e-61
CHEMBL1614701	SELUMETINIB	EFO_0003095	non-alcoholic fatty liver disease	3317	1226	225	64102	4.34587114857336	1.16583082563467e-62	FALSE	6.73757604487702e-61
CHEMBL445813	AT-7519	EFO_0005306	ventricular tachycardia	3979	1359	264	64102	3.83107741640769	1.17421101992254e-62	FALSE	6.78072597146707e-61
CHEMBL2107832	PIMASERTIB	EFO_0000289	bipolar disorder	790	5835	236	64102	4.39102144635249	1.26002199203954e-62	FALSE	7.27060123789223e-61
CHEMBL1079175	MK-2206	EFO_0005306	ventricular tachycardia	2937	1359	223	64102	4.3416974851199	1.76751399001135e-62	FALSE	1.01910159773731e-60
CHEMBL1513	IRBESARTAN	EFO_0003885	multiple sclerosis	956	4889	240	64102	4.21769029576037	1.84741232841234e-62	FALSE	1.0643418620329e-60
CHEMBL2103875	TRAMETINIB	EFO_0000764	HIV infection	2703	1866	255	64102	3.86591329951142	1.91886396108731e-62	FALSE	1.10464934237769e-60
CHEMBL83	TAMOXIFEN	EFO_0001073	obesity	858	7209	278	64102	3.89376812067834	1.9267916722604e-62	FALSE	1.10835330263631e-60
CHEMBL1512	FLUNISOLIDE	EFO_0003885	multiple sclerosis	958	4889	240	64102	4.20580684956349	2.82586084667954e-62	FALSE	1.62426804126921e-60
CHEMBL491473	CEDIRANIB	HP_0003124	hypercholesterolemia	1119	4983	266	64102	3.85142605310655	3.01223030247278e-62	FALSE	1.73005069345969e-60
CHEMBL1976040	AZD-1775	EFO_0000764	HIV infection	2693	1866	254	64102	3.86314780033149	3.59881434038217e-62	FALSE	2.06535203501979e-60
CHEMBL507361	PD-0325901	EFO_0002690	systemic lupus erythematosus	4217	1452	283	64102	3.61301560353201	3.92127577017733e-62	FALSE	2.24867286341583e-60
CHEMBL554	LAPATINIB	EFO_0002614	insulin resistance	1865	2330	234	64102	4.11647466730977	4.0050779300507e-62	FALSE	2.29495604478311e-60
CHEMBL601719	CRIZOTINIB	EFO_0001645	coronary heart disease	2617	2120	269	64102	3.69121384534716	4.14878678637301e-62	FALSE	2.37546854539204e-60
CHEMBL503	LOVASTATIN	EFO_0001359	type I diabetes mellitus	856	5458	238	64102	4.2809910596047	4.26051510896261e-62	FALSE	2.43755993570216e-60
CHEMBL21731	MAPROTILINE	EFO_0000289	bipolar disorder	812	5835	239	64102	4.30033252472771	4.58054446407432e-62	FALSE	2.61863868995867e-60
CHEMBL288441	BOSUTINIB	Orphanet_84	Fanconi anemia	1594	3761	280	64102	3.61309428875743	5.45081484205366e-62	FALSE	3.11376224291449e-60
CHEMBL1789941	RUXOLITINIB	EFO_0000692	schizophrenia	1263	5048	288	64102	3.6039839206533	5.51957377091716e-62	FALSE	3.15061516669929e-60
CHEMBL402548	Danusertib	EFO_0001359	type I diabetes mellitus	956	5458	254	64102	4.0288230509398	5.77590655252224e-62	FALSE	3.29439773812385e-60
CHEMBL1614701	SELUMETINIB	EFO_0000764	HIV infection	3317	1866	286	64102	3.53558640168664	6.33603748069309e-62	FALSE	3.611103389054e-60
CHEMBL1229517	VEMURAFENIB	EFO_0000764	HIV infection	2910	1866	265	64102	3.72938776888677	6.96943433642154e-62	FALSE	3.9690473901317e-60
CHEMBL27759	ENTINOSTAT	EFO_0000712	stroke	2971	1475	234	64102	4.12583392850909	7.47075645161979e-62	FALSE	4.25128437494208e-60
CHEMBL603469	LESTAURTINIB	EFO_0002508	Parkinson's disease	1691	3371	272	64102	3.6682477101043	8.10356238206416e-62	FALSE	4.60785323035303e-60
CHEMBL300138	ENZASTAURIN	EFO_0000249	Alzheimers disease	1294	3757	247	64102	3.98558496052155	8.20669155778847e-62	FALSE	4.6629214934586e-60
CHEMBL45816	MIBEFRADIL	EFO_0000289	bipolar disorder	1058	5835	280	64102	3.72428644042794	1.02341106876024e-61	FALSE	5.8104222155588e-60
CHEMBL1484	NICARDIPINE	EFO_0000692	schizophrenia	897	5048	234	64102	4.28096696335262	1.06859491985429e-61	FALSE	6.06231544554949e-60
CHEMBL445813	AT-7519	HP_0000545	Myopia	3979	1322	258	64102	3.84887715781085	1.20571113973735e-61	FALSE	6.83497288955006e-60
CHEMBL408513	BELINOSTAT	EFO_0000729	ulcerative colitis	3180	1773	270	64102	3.66762253652295	1.55498446048393e-61	FALSE	8.80821541146643e-60
CHEMBL572878	TOZASERTIB	EFO_0000712	stroke	2870	1475	229	64102	4.17430644911555	1.75400818044726e-61	FALSE	9.92800740122723e-60
CHEMBL1263	SALMETEROL	EFO_0000289	bipolar disorder	706	5835	219	64102	4.62652769727737	2.34047571955893e-61	FALSE	1.3237423839167e-59
CHEMBL1241855	RIGOSERTIB	EFO_0000673	prostate adenocarcinoma	1885	3249	283	64102	3.52881796473282	3.19014900658409e-61	FALSE	1.80293226986727e-59
CHEMBL325041	BORTEZOMIB	EFO_0001365	age-related macular degeneration	2931	2123	286	64102	3.49234839064222	3.39181370970801e-61	FALSE	1.91544548195497e-59
CHEMBL1289494	TIVOZANIB	EFO_0000253	amyotrophic lateral sclerosis	2141	2437	258	64102	3.75920413631007	3.67699363058688e-61	FALSE	2.07491492287224e-59
CHEMBL1173655	AFATINIB	EFO_0000378	coronary artery disease	1170	3553	225	64102	4.264121103501	3.74282591384385e-61	FALSE	2.11045894328863e-59
CHEMBL1201129	DECITABINE	EFO_0003885	multiple sclerosis	843	4889	221	64102	4.45954922848373	3.95882626683229e-61	FALSE	2.23055962893159e-59
CHEMBL1512	FLUNISOLIDE	EFO_0003758	autism	958	5501	254	64102	3.98141072520756	4.1402277243042e-61	FALSE	2.33099846951436e-59
CHEMBL1491	AMLODIPINE	EFO_0000289	bipolar disorder	1133	5835	291	64102	3.57967485070272	4.51337086643108e-61	FALSE	2.53915606628899e-59
CHEMBL428690	ALVOCIDIB	EFO_0005429	borderline personality disorder symptom	4118	1205	248	64102	3.95273422315691	4.71089062058833e-61	FALSE	2.6482699886421e-59
CHEMBL1287853	FEDRATINIB	EFO_0002690	systemic lupus erythematosus	3684	1452	260	64102	3.77235129937045	5.43676005968976e-61	FALSE	3.05401044836698e-59
CHEMBL2216870	IDELALISIB	HP_0003124	hypercholesterolemia	1030	4983	251	64102	3.97269206248112	5.53834445206779e-61	FALSE	3.10872049974047e-59
CHEMBL1908360	EVEROLIMUS	EFO_0000195	metabolic syndrome	1590	3177	252	64102	3.83696270404709	6.95004996199232e-61	FALSE	3.89817428140317e-59
CHEMBL408513	BELINOSTAT	EFO_0000612	myocardial infarction	3180	1504	244	64102	3.93519772826455	8.01170881157564e-61	FALSE	4.49024812962969e-59
CHEMBL408513	BELINOSTAT	EFO_0000764	HIV infection	3180	1866	277	64102	3.56267898564547	8.58871153516487e-61	FALSE	4.81000256201441e-59
CHEMBL506871	VELIPARIB	HP_0003124	hypercholesterolemia	1046	4983	253	64102	3.93441278227196	8.69563240174581e-61	FALSE	4.86620967097698e-59
CHEMBL2216870	IDELALISIB	EFO_0004211	Hypertriglyceridemia	1030	3627	211	64102	4.49900238301138	1.00218742964851e-60	FALSE	5.60416866745046e-59
CHEMBL428690	ALVOCIDIB	EFO_0003767	inflammatory bowel disease	4118	1438	275	64102	3.61900399023443	1.03534716422589e-60	FALSE	5.78523616877876e-59
CHEMBL567	PERPHENAZINE	EFO_0003758	autism	888	5501	242	64102	4.12844910464059	1.09794216632062e-60	FALSE	6.13038363068635e-59
CHEMBL1231160	PEVONEDISTAT	EFO_0001365	age-related macular degeneration	2455	2123	257	64102	3.7460424553109	1.10690030574081e-60	FALSE	6.17575467575164e-59
CHEMBL289228	TIPIFARNIB	EFO_0003758	autism	780	5501	224	64102	4.4314535979731	1.26153073632382e-60	FALSE	7.03319972118026e-59
CHEMBL1976040	AZD-1775	EFO_0005306	ventricular tachycardia	2693	1359	210	64102	4.43539411669777	1.30514837385398e-60	FALSE	7.27091104217975e-59
CHEMBL288441	BOSUTINIB	EFO_0000673	prostate adenocarcinoma	1594	3249	255	64102	3.78576302296557	1.55048702420701e-60	FALSE	8.63119952222665e-59
CHEMBL27759	ENTINOSTAT	EFO_0000676	psoriasis	2971	1693	251	64102	3.81988157667782	1.66159317314882e-60	FALSE	9.24276772215204e-59
CHEMBL1079175	MK-2206	EFO_0001365	age-related macular degeneration	2937	2123	285	64102	3.46866759610466	1.82417278017816e-60	FALSE	1.01395311725184e-58
CHEMBL521686	OLAPARIB	EFO_0000195	metabolic syndrome	1599	3177	252	64102	3.81078411116454	2.12753607615901e-60	FALSE	1.18169022852829e-58
CHEMBL21731	MAPROTILINE	EFO_0003758	autism	812	5501	229	64102	4.32270660887093	2.17404636698536e-60	FALSE	1.2066201246234e-58
CHEMBL1200500	BECLOMETHASONE DIPROPIONATE	EFO_0001073	obesity	576	7209	215	64102	4.81384229436352	2.48332303508043e-60	FALSE	1.37724204647342e-58
CHEMBL288441	BOSUTINIB	EFO_0002508	Parkinson's disease	1594	3371	260	64102	3.72068535016859	2.69799094438379e-60	FALSE	1.49517862604929e-58
CHEMBL506871	VELIPARIB	EFO_0004211	Hypertriglyceridemia	1046	3627	212	64102	4.43921654764355	3.52551496165746e-60	FALSE	1.95086381603126e-58
CHEMBL502835	NINTEDANIB	EFO_0001645	coronary heart disease	2163	2120	238	64102	3.94530655058775	3.6061719058599e-60	FALSE	1.9940088396001e-58
CHEMBL1789941	RUXOLITINIB	EFO_0000384	Crohn's disease	1263	3430	229	64102	4.12615061046874	3.65043986843319e-60	FALSE	2.01698354755834e-58
CHEMBL1879463	DACTOLISIB	EFO_0005429	borderline personality disorder symptom	3807	1205	236	64102	4.04619870060203	3.69057059832572e-60	FALSE	2.03763981583899e-58
CHEMBL98	VORINOSTAT	EFO_0000181	head and neck squamous cell carcinoma	4984	985	243	64102	4.03261902575881	4.08839670330801e-60	FALSE	2.25560949716707e-58
CHEMBL98	VORINOSTAT	EFO_0004274	gout	4984	1054	253	64102	3.89281538712315	4.40490859631583e-60	FALSE	2.42842676366728e-58
CHEMBL408513	BELINOSTAT	EFO_0000712	stroke	3180	1475	240	64102	3.94531134337654	4.58249231358946e-60	FALSE	2.52445317097183e-58
CHEMBL521686	OLAPARIB	EFO_0000378	coronary artery disease	1599	3553	268	64102	3.62943430696694	5.01351108154556e-60	FALSE	2.75984858906594e-58
CHEMBL491473	CEDIRANIB	EFO_0004211	Hypertriglyceridemia	1119	3627	220	64102	4.27906541819266	5.28010665663702e-60	FALSE	2.90445007009451e-58
CHEMBL1173655	AFATINIB	EFO_0003761	unipolar depression	1170	4304	248	64102	3.9047047210497	5.37850427954362e-60	FALSE	2.95638451898915e-58
CHEMBL572878	TOZASERTIB	HP_0000545	Myopia	2870	1322	213	64102	4.34588959342711	5.67318197567312e-60	FALSE	3.11605084015414e-58
CHEMBL1230609	FORETINIB	EFO_0000253	amyotrophic lateral sclerosis	2302	2437	267	64102	3.604919569583	5.82723541495368e-60	FALSE	3.19829884590708e-58
CHEMBL27759	ENTINOSTAT	HP_0000545	Myopia	2971	1322	217	64102	4.28011936278806	5.84381345020756e-60	FALSE	3.20502717718147e-58
CHEMBL1489	AZACITIDINE	EFO_0003869	breast neoplasm	2070	2205	237	64102	3.94608090048255	5.99929231772345e-60	FALSE	3.28786917604629e-58
CHEMBL576982	QUIZARTINIB	EFO_0000692	schizophrenia	976	5048	243	64102	4.02398158442745	6.88110084354176e-60	FALSE	3.76835489369016e-58
CHEMBL428690	ALVOCIDIB	HP_0000545	Myopia	4118	1322	260	64102	3.73864453000865	6.9065290339999e-60	FALSE	3.779491054336e-58
CHEMBL1908394	GSK-461364	EFO_0001365	age-related macular degeneration	2431	2123	254	64102	3.73335293577903	8.59832830323767e-60	FALSE	4.7018345743681e-58
CHEMBL1230609	FORETINIB	EFO_0000270	asthma	2302	2121	246	64102	3.824033808931	8.82626020664208e-60	FALSE	4.82292075577228e-58
CHEMBL223360	LINIFANIB	EFO_0005306	ventricular tachycardia	3168	1359	228	64102	4.10052494849572	8.84680916592846e-60	FALSE	4.83059215715763e-58
CHEMBL507361	PD-0325901	EFO_0001060	celiac disease	4217	1164	244	64102	3.93640308908357	9.98700546017896e-60	FALSE	5.44915985421015e-58
CHEMBL1370	BUDESONIDE	EFO_0000537	hypertension	549	6014	190	64102	5.24580000975213	1.08033119989573e-59	FALSE	5.89022606085692e-58
CHEMBL1512	FLUNISOLIDE	EFO_0004211	Hypertriglyceridemia	958	3627	201	64102	4.62805259518693	1.20149976951544e-59	FALSE	6.54605656364854e-58
CHEMBL1976040	AZD-1775	EFO_0003095	non-alcoholic fatty liver disease	2693	1226	197	64102	4.63052696089427	1.22979135846223e-59	FALSE	6.69528009939032e-58
CHEMBL2216870	IDELALISIB	EFO_0000378	coronary artery disease	1030	3553	207	64102	4.48941071846913	1.33770582534701e-59	FALSE	7.2774531356213e-58
CHEMBL2017974	BUPARLISIB	EFO_0000270	asthma	2439	2121	254	64102	3.72331018521338	1.35219212856019e-59	FALSE	7.35087303295306e-58
CHEMBL1879463	DACTOLISIB	HP_0100543	cognitive impairment	3807	1411	258	64102	3.72844616016889	1.35763782338596e-59	FALSE	7.37507428143155e-58
CHEMBL506871	VELIPARIB	EFO_0000249	Alzheimers disease	1046	3757	215	64102	4.34703594719056	1.58121290596417e-59	FALSE	8.58331409561605e-58
CHEMBL223360	LINIFANIB	EFO_0003767	inflammatory bowel disease	3168	1438	235	64102	3.97824150453729	1.83986070520884e-59	FALSE	9.9800338910835e-58
CHEMBL289228	TIPIFARNIB	EFO_0001359	type I diabetes mellitus	780	5458	221	64102	4.38489631736506	2.76081536688829e-59	FALSE	1.49646679547075e-57
CHEMBL428690	ALVOCIDIB	EFO_0001060	celiac disease	4118	1164	240	64102	3.95587899479663	3.02303419933306e-59	FALSE	1.63740330482854e-57
CHEMBL108	CARBAMAZEPINE	EFO_0001073	obesity	728	7209	246	64102	4.13505439355356	3.13442863858466e-59	FALSE	1.69650092725146e-57
CHEMBL2107832	PIMASERTIB	EFO_0003885	multiple sclerosis	790	4889	210	64102	4.53697862658401	3.17313196449102e-59	FALSE	1.71619721155289e-57
CHEMBL507361	PD-0325901	EFO_0003767	inflammatory bowel disease	4217	1438	276	64102	3.53906941619838	3.6537354235263e-59	FALSE	1.9746936424091e-57
CHEMBL1908391	Masitinib	EFO_0003758	autism	735	5501	214	64102	4.51216486762608	4.42049555714963e-59	FALSE	2.38735715297153e-57
CHEMBL1879463	DACTOLISIB	EFO_0003819	dental caries	3807	1116	224	64102	4.16331489958446	4.51294229542237e-59	FALSE	2.43551187659504e-57
CHEMBL445813	AT-7519	EFO_0005429	borderline personality disorder symptom	3979	1205	240	64102	3.93514312946218	4.65160920668773e-59	FALSE	2.50852224696412e-57
CHEMBL939	GEFITINIB	EFO_0000270	asthma	2112	2121	233	64102	3.94735436795323	4.7686274565704e-59	FALSE	2.56976035159627e-57
CHEMBL1879463	DACTOLISIB	EFO_0000676	psoriasis	3807	1693	287	64102	3.41485658714058	4.82789732235816e-59	FALSE	2.59981219742806e-57
CHEMBL1201129	DECITABINE	EFO_0001359	type I diabetes mellitus	843	5458	231	64102	4.19069807038545	4.88365767526437e-59	FALSE	2.62793196369103e-57
CHEMBL2105737	SONIDEGIB	EFO_0000289	bipolar disorder	911	5835	251	64102	3.92279404785588	5.27703588445561e-59	FALSE	2.8375539696089e-57
CHEMBL507361	PD-0325901	EFO_0004274	gout	4217	1054	229	64102	4.11077138221217	5.3398238275794e-59	FALSE	2.86923698135792e-57
CHEMBL325041	BORTEZOMIB	EFO_0000764	HIV infection	2931	1866	261	64102	3.62747650224988	5.38243309573639e-59	FALSE	2.89003942018176e-57
CHEMBL1173655	AFATINIB	EFO_0004211	Hypertriglyceridemia	1170	3627	224	64102	4.14207041004311	5.89238360661791e-59	FALSE	3.16156417591527e-57
CHEMBL1421	DASATINIB	EFO_0000319	cardiovascular disease	4246	994	222	64102	4.22224106739923	6.56041270932013e-59	FALSE	3.5174524934617e-57
CHEMBL272980	MOCETINOSTAT	EFO_0000712	stroke	2992	1475	230	64102	4.00409430962754	7.37375021629868e-59	FALSE	3.95067967364941e-57
CHEMBL1200975	CLOCORTOLONE PIVALATE	EFO_0000537	hypertension	560	6014	191	64102	5.13050097790495	7.40994894015768e-59	FALSE	3.96720967607793e-57
CHEMBL1241855	RIGOSERTIB	EFO_0003869	breast neoplasm	1885	2205	223	64102	4.07759308193484	7.72220505326504e-59	FALSE	4.13140754129439e-57
CHEMBL1229517	VEMURAFENIB	EFO_0003095	non-alcoholic fatty liver disease	2910	1226	204	64102	4.43825433242263	8.03045899861142e-59	FALSE	4.29322917861643e-57
CHEMBL521851	PICTILISIB	EFO_0003095	non-alcoholic fatty liver disease	3076	1226	210	64102	4.32768286407612	1.01805148006254e-58	FALSE	5.43876962404901e-57
CHEMBL445813	AT-7519	EFO_0003767	inflammatory bowel disease	3979	1438	266	64102	3.60327110755352	1.12458403502423e-58	FALSE	6.0035797351779e-57
CHEMBL300138	ENZASTAURIN	EFO_0000673	prostate adenocarcinoma	1294	3249	223	64102	4.11347272510221	1.13362277432378e-58	FALSE	6.04748224074018e-57
CHEMBL809	SERTRALINE	EFO_0000378	coronary artery disease	1061	3553	209	64102	4.37901247702666	1.21840919632813e-58	FALSE	6.49511885154663e-57
CHEMBL1542	AZATHIOPRINE	EFO_0001073	obesity	565	7209	210	64102	4.77846490398127	1.36808742893851e-58	FALSE	7.28779093068071e-57
CHEMBL554	LAPATINIB	EFO_0000253	amyotrophic lateral sclerosis	1865	2437	234	64102	3.90968324018882	1.46957331371715e-58	FALSE	7.82278965167729e-57
CHEMBL300138	ENZASTAURIN	EFO_0000685	rheumatoid arthritis	1294	3417	229	64102	4.02124383062678	1.68778611243284e-58	FALSE	8.97793322387663e-57
CHEMBL1287853	FEDRATINIB	EFO_0005429	borderline personality disorder symptom	3684	1205	229	64102	4.03677179439655	1.83030937000693e-58	FALSE	9.72909074508342e-57
CHEMBL45816	MIBEFRADIL	EFO_0001359	type I diabetes mellitus	1058	5458	264	64102	3.7029894134472	1.85606166099022e-58	FALSE	9.85891593083604e-57
CHEMBL178	DAUNORUBICIN	Orphanet_84	Fanconi anemia	1724	3761	287	64102	3.38629255919521	1.92665196290304e-58	FALSE	1.02265528545937e-56
CHEMBL521851	PICTILISIB	HP_0100543	cognitive impairment	3076	1411	227	64102	4.02701829140015	1.93211825928899e-58	FALSE	1.02482369857426e-56
CHEMBL1201129	DECITABINE	HP_0003124	hypercholesterolemia	843	4983	219	64102	4.30927328246482	2.06955183791748e-58	FALSE	1.09693638666191e-56
CHEMBL1230609	FORETINIB	EFO_0003869	breast neoplasm	2302	2205	249	64102	3.71091011550588	2.64541623307101e-58	FALSE	1.39916686796176e-56
CHEMBL325041	BORTEZOMIB	EFO_0000729	ulcerative colitis	2931	1773	252	64102	3.68848605825042	2.75169456481107e-58	FALSE	1.45434113377354e-56
CHEMBL2103882	TIVANTINIB	EFO_0002614	insulin resistance	1591	2330	208	64102	4.27991315768807	4.03938503344175e-58	FALSE	2.1333990491569e-56
CHEMBL98	VORINOSTAT	Orphanet_797	Sarcoidosis	4984	1078	253	64102	3.7781813938553	4.54916718266706e-58	FALSE	2.40093137119352e-56
CHEMBL1064	SIMVASTATIN	EFO_0003761	unipolar depression	1206	4304	249	64102	3.7750516887658	5.98203408453974e-58	FALSE	3.15043888746112e-56
CHEMBL98	VORINOSTAT	EFO_0004319	smoking cessation	4984	770	207	64102	4.50670099279698	6.6731334814749e-58	FALSE	3.51191397158046e-56
CHEMBL521851	PICTILISIB	EFO_0001365	age-related macular degeneration	3076	2123	288	64102	3.33199035380988	7.50536310883522e-58	FALSE	3.94709758675491e-56
CHEMBL1289494	TIVOZANIB	EFO_0003869	breast neoplasm	2141	2205	238	64102	3.81455869812889	7.74770857388725e-58	FALSE	4.07166228558997e-56
CHEMBL601719	CRIZOTINIB	EFO_0000712	stroke	2617	1475	212	64102	4.20296605244674	7.82214336318703e-58	FALSE	4.107870829903e-56
CHEMBL402548	Danusertib	EFO_0004211	Hypertriglyceridemia	956	3627	198	64102	4.54890970854384	8.21442800737261e-58	FALSE	4.31083189736269e-56
CHEMBL1513	IRBESARTAN	EFO_0001359	type I diabetes mellitus	956	5458	247	64102	3.87268089128487	8.85992565157299e-58	FALSE	4.64629528604222e-56
CHEMBL491473	CEDIRANIB	EFO_0000378	coronary artery disease	1119	3553	214	64102	4.22380805949826	9.52833326751567e-58	FALSE	4.99329074940678e-56
CHEMBL572878	TOZASERTIB	EFO_0000729	ulcerative colitis	2870	1773	248	64102	3.70345939093036	9.83213891726524e-58	FALSE	5.14886286771819e-56
CHEMBL384467	DEXAMETHASONE	EFO_0000537	hypertension	734	6014	222	64102	4.31025473268593	1.00384423666896e-57	FALSE	5.24948989302469e-56
CHEMBL1079175	MK-2206	HP_0000545	Myopia	2937	1322	212	64102	4.20901306139001	1.17167190093942e-57	FALSE	6.12281080346547e-56
CHEMBL1976040	AZD-1775	EFO_0000712	stroke	2693	1475	215	64102	4.14171833792973	1.29975646200408e-57	FALSE	6.78736300232323e-56
CHEMBL1908391	Masitinib	EFO_0000537	hypertension	735	6014	222	64102	4.30178370934273	1.30756631911263e-57	FALSE	6.82334449435676e-56
CHEMBL83	TAMOXIFEN	EFO_0004211	Hypertriglyceridemia	858	3627	186	64102	4.81017130059189	1.62078554458653e-57	FALSE	8.45188976360106e-56
CHEMBL567	PERPHENAZINE	EFO_0003885	multiple sclerosis	888	4889	222	64102	4.18168480070999	1.7641624114541e-57	FALSE	9.19309492569885e-56
CHEMBL491473	CEDIRANIB	EFO_0000195	metabolic syndrome	1119	3177	201	64102	4.41472569922093	2.04206658090755e-57	FALSE	1.06337930271049e-55
CHEMBL521851	PICTILISIB	HP_0000545	Myopia	3076	1322	217	64102	4.11578100334395	2.16485175982719e-57	FALSE	1.12652752340797e-55
CHEMBL2103875	TRAMETINIB	EFO_0000729	ulcerative colitis	2703	1773	239	64102	3.78548261010637	2.26433014005868e-57	FALSE	1.17746754059604e-55
CHEMBL1908360	EVEROLIMUS	EFO_0000384	Crohn's disease	1590	3430	257	64102	3.60530127414068	2.33229877412482e-57	FALSE	1.21196239869701e-55
CHEMBL1231160	PEVONEDISTAT	EFO_0000270	asthma	2455	2121	251	64102	3.63992731891708	2.3848211148935e-57	FALSE	1.23838803940289e-55
CHEMBL491473	CEDIRANIB	EFO_0003761	unipolar depression	1119	4304	237	64102	3.89285401725015	2.77610340008329e-57	FALSE	1.44056470491735e-55
CHEMBL1479	DANAZOL	EFO_0000195	metabolic syndrome	677	3177	153	64102	5.83154833957844	3.28153901548985e-57	FALSE	1.70165340771785e-55
CHEMBL572878	TOZASERTIB	EFO_0003095	non-alcoholic fatty liver disease	2870	1226	200	64102	4.39533653928741	3.34314476161274e-57	FALSE	1.73238866644884e-55
CHEMBL272980	MOCETINOSTAT	EFO_0001365	age-related macular degeneration	2992	2123	282	64102	3.34994772299713	3.44970151084995e-57	FALSE	1.78635799450538e-55
CHEMBL21731	MAPROTILINE	EFO_0000537	hypertension	812	6014	235	64102	4.05338766699504	3.58994007878564e-57	FALSE	1.85768133574818e-55
CHEMBL445813	AT-7519	EFO_0001060	celiac disease	3979	1164	232	64102	3.93245141734579	3.70378101707467e-57	FALSE	1.91525484579809e-55
CHEMBL408513	BELINOSTAT	EFO_0000676	psoriasis	3180	1693	255	64102	3.60594470913913	3.76091813179619e-57	FALSE	1.94344658753437e-55
CHEMBL1512	FLUNISOLIDE	EFO_0000195	metabolic syndrome	958	3177	184	64102	4.77684757613022	4.02276995284084e-57	FALSE	2.07731137335111e-55
CHEMBL180022	NERATINIB	HP_0100543	cognitive impairment	3106	1411	226	64102	3.96078247254563	4.23069367357129e-57	FALSE	2.18316150241556e-55
CHEMBL1479	DANAZOL	EFO_0003758	autism	677	5501	201	64102	4.63088079031399	4.61674493092284e-57	FALSE	2.38071964975072e-55
CHEMBL325041	BORTEZOMIB	EFO_0003095	non-alcoholic fatty liver disease	2931	1226	202	64102	4.34753912331793	4.98368275834002e-57	FALSE	2.56815402140709e-55
CHEMBL38	TRETINOIN	EFO_0000537	hypertension	785	6014	230	64102	4.12235298500959	5.04511130477297e-57	FALSE	2.59800474927604e-55
CHEMBL14762	SELICICLIB	EFO_0000673	prostate adenocarcinoma	1650	3249	254	64102	3.6117534102382	5.27296013692207e-57	FALSE	2.7134535850229e-55
CHEMBL2107832	PIMASERTIB	EFO_0001073	obesity	790	7209	255	64102	3.86235046215822	5.46723393945127e-57	FALSE	2.81147674620223e-55
CHEMBL507361	PD-0325901	EFO_0003882	osteoporosis	4217	916	208	64102	4.33646680575161	5.62223623121344e-57	FALSE	2.88918309928804e-55
CHEMBL1421	DASATINIB	EFO_0001060	celiac disease	4246	1164	240	64102	3.82047258903589	8.07233760442517e-57	FALSE	4.14538278156657e-55
CHEMBL491473	CEDIRANIB	EFO_0000249	Alzheimers disease	1119	3757	219	64102	4.08845177612729	9.21286786379398e-57	FALSE	4.72780677616067e-55
CHEMBL121	ROSIGLITAZONE	HP_0003124	hypercholesterolemia	1109	4983	255	64102	3.67945226760939	1.01871077221986e-56	FALSE	5.22414878041288e-55
CHEMBL2017974	BUPARLISIB	EFO_0000764	HIV infection	2439	1866	231	64102	3.84107905817784	1.10331155428907e-56	FALSE	5.65409073798482e-55
CHEMBL608533	MIDOSTAURIN	EFO_0002508	Parkinson's disease	1525	3371	247	64102	3.67773339283422	1.11083558811378e-56	FALSE	5.68872013912927e-55
CHEMBL1079175	MK-2206	EFO_0000712	stroke	2937	1475	224	64102	3.95430079200795	1.15518917939231e-56	FALSE	5.91178021081422e-55
CHEMBL2103847	TOSEDOSTAT	EFO_0000712	stroke	2502	1475	205	64102	4.2394023231882	1.17732357985499e-56	FALSE	6.02090256672225e-55
CHEMBL14762	SELICICLIB	Orphanet_84	Fanconi anemia	1650	3761	276	64102	3.39870066956081	1.27104316437227e-56	FALSE	6.49571336172483e-55
CHEMBL108	CARBAMAZEPINE	EFO_0003758	autism	728	5501	209	64102	4.41974024343337	1.34525661686168e-56	FALSE	6.87025239189408e-55
CHEMBL288441	BOSUTINIB	EFO_0000249	Alzheimers disease	1594	3757	270	64102	3.45155405219977	1.36916266755056e-56	FALSE	6.98753203202126e-55
CHEMBL1491	AMLODIPINE	HP_0003124	hypercholesterolemia	1133	4983	258	64102	3.63446004242211	1.6322020017744e-56	FALSE	8.32423020904942e-55
CHEMBL108	CARBAMAZEPINE	EFO_0001359	type I diabetes mellitus	728	5458	208	64102	4.42844708229755	1.64740079119996e-56	FALSE	8.39597360652427e-55
CHEMBL1908394	GSK-461364	EFO_0001645	coronary heart disease	2431	2120	248	64102	3.62849362132246	1.6642118226547e-56	FALSE	8.47582967056224e-55
CHEMBL552212	LEXIBULIN	EFO_0003869	breast neoplasm	1991	2205	226	64102	3.8906224137748	1.85754562229483e-56	FALSE	9.45398991100054e-55
CHEMBL1241855	RIGOSERTIB	EFO_0002614	insulin resistance	1885	2330	226	64102	3.89208155138276	1.87817050402586e-56	FALSE	9.55240865327202e-55
CHEMBL223360	LINIFANIB	HP_0000545	Myopia	3168	1322	219	64102	4.02825740378546	1.90239581996851e-56	FALSE	9.66899190553173e-55
CHEMBL552212	LEXIBULIN	EFO_0001645	coronary heart disease	1991	2120	221	64102	3.95882820576602	1.91050803901642e-56	FALSE	9.70357625155466e-55
CHEMBL1484	NICARDIPINE	EFO_0000378	coronary artery disease	897	3553	187	64102	4.68239547403502	1.98848474097016e-56	FALSE	1.00927161562032e-54
CHEMBL1229517	VEMURAFENIB	EFO_0000676	psoriasis	2910	1693	241	64102	3.71534893549228	2.0515154183782e-56	FALSE	1.04055161736674e-54
CHEMBL289228	TIPIFARNIB	EFO_0001073	obesity	780	7209	252	64102	3.86632313431485	2.05720879762937e-56	FALSE	1.04272663133939e-54
CHEMBL272980	MOCETINOSTAT	HP_0000545	Myopia	2992	1322	212	64102	4.12200177858957	2.54717745979433e-56	FALSE	1.29019319729719e-54
CHEMBL223360	LINIFANIB	EFO_0002690	systemic lupus erythematosus	3168	1452	231	64102	3.84661260828367	2.62441258346646e-56	FALSE	1.32840747446199e-54
CHEMBL1473	FLUTICASONE PROPIONATE	EFO_0000378	coronary artery disease	822	3553	178	64102	4.90503591513078	2.72635386256764e-56	FALSE	1.37906672373437e-54
CHEMBL1079175	MK-2206	EFO_0000676	psoriasis	2937	1693	242	64102	3.69491215952258	2.96960526088487e-56	FALSE	1.50108690997249e-54
CHEMBL1079175	MK-2206	EFO_0003095	non-alcoholic fatty liver disease	2937	1226	201	64102	4.31024324485917	3.00049053055872e-56	FALSE	1.51566643853036e-54
CHEMBL217092	SARACATINIB	EFO_0000270	asthma	2438	2121	248	64102	3.61450952593443	3.11215018348838e-56	FALSE	1.57100070997112e-54
CHEMBL483254	PANOBINOSTAT	EFO_0000270	asthma	2060	2121	225	64102	3.8896390261555	3.20404300076068e-56	FALSE	1.61628831319814e-54
CHEMBL483254	PANOBINOSTAT	EFO_0003869	breast neoplasm	2060	2205	230	64102	3.82250236748129	3.40453761098898e-56	FALSE	1.71626164010487e-54
CHEMBL1908360	EVEROLIMUS	Orphanet_84	Fanconi anemia	1590	3761	269	64102	3.44158668565746	3.49441932413349e-56	FALSE	1.76037600778904e-54
CHEMBL14762	SELICICLIB	EFO_0002508	Parkinson's disease	1650	3371	258	64102	3.53285466626976	3.52521143915155e-56	FALSE	1.77468327572755e-54
CHEMBL14762	SELICICLIB	EFO_0002614	insulin resistance	1650	2330	209	64102	4.12540110967716	4.26775195410264e-56	FALSE	2.14704090680804e-54
CHEMBL428690	ALVOCIDIB	EFO_0003882	osteoporosis	4118	916	204	64102	4.33877503655997	4.31188986566165e-56	FALSE	2.16777633795002e-54
CHEMBL27759	ENTINOSTAT	EFO_0003095	non-alcoholic fatty liver disease	2971	1226	202	64102	4.28189940843516	4.34256143169094e-56	FALSE	2.18171815192029e-54
CHEMBL1078983	AZD-2014	EFO_0003869	breast neoplasm	2110	2205	233	64102	3.77822796747212	4.41756509822717e-56	FALSE	2.21789863405918e-54
CHEMBL27759	ENTINOSTAT	EFO_0000612	myocardial infarction	2971	1504	227	64102	3.87751622077484	4.51405344653432e-56	FALSE	2.26480957403705e-54
CHEMBL180022	NERATINIB	HP_0000545	Myopia	3106	1322	216	64102	4.0471561787033	4.53964273106517e-56	FALSE	2.27610938418034e-54
CHEMBL503	LOVASTATIN	EFO_0003885	multiple sclerosis	856	4889	215	64102	4.20325659006781	4.65183111843209e-56	FALSE	2.3307841198059e-54
CHEMBL2103851	AMUVATINIB	EFO_0000537	hypertension	672	6014	208	64102	4.44908329580959	5.5159898238948e-56	FALSE	2.7600406263123e-54
CHEMBL1879463	DACTOLISIB	EFO_0002690	systemic lupus erythematosus	3807	1452	256	64102	3.56223379295523	5.60805763187914e-56	FALSE	2.80421776666841e-54
CHEMBL503	LOVASTATIN	EFO_0003758	autism	856	5501	229	64102	4.01655517430655	6.55250427739789e-56	FALSE	3.27426653134216e-54
CHEMBL325041	BORTEZOMIB	EFO_0000612	myocardial infarction	2931	1504	225	64102	3.89367751188151	6.5657217421226e-56	FALSE	3.27866340426788e-54
CHEMBL428690	ALVOCIDIB	EFO_0004274	gout	4118	1054	221	64102	4.02707371819513	6.67235569868053e-56	FALSE	3.32967151728708e-54
CHEMBL1229517	VEMURAFENIB	HP_0000545	Myopia	2910	1322	208	64102	4.15140431584294	7.93822263401542e-56	FALSE	3.95870840428168e-54
CHEMBL180022	NERATINIB	EFO_0005306	ventricular tachycardia	3106	1359	219	64102	3.9829104097205	8.56701378950586e-56	FALSE	4.2694107337158e-54
CHEMBL2103882	TIVANTINIB	EFO_0003869	breast neoplasm	1591	2205	198	64102	4.28481352408871	1.1828383323266e-55	FALSE	5.88682216299766e-54
CHEMBL178	DAUNORUBICIN	EFO_0003869	breast neoplasm	1724	2205	207	64102	4.12349909437209	1.26878397207305e-55	FALSE	6.3103293999786e-54
CHEMBL300138	ENZASTAURIN	EFO_0002614	insulin resistance	1294	2330	182	64102	4.62178484255464	1.45006575573579e-55	FALSE	7.20710846646846e-54
CHEMBL191	LOSARTAN	EFO_0001073	obesity	509	7209	193	64102	4.92503772895973	1.6108119598886e-55	FALSE	8.00068952366358e-54
CHEMBL1231160	PEVONEDISTAT	EFO_0000712	stroke	2455	1475	201	64102	4.22569096387852	1.8316873965172e-55	FALSE	9.091663094218e-54
CHEMBL98	VORINOSTAT	EFO_0002506	osteoarthritis	4984	808	209	64102	4.27605106690014	1.98735671785708e-55	FALSE	9.85774099255244e-54
CHEMBL1200666	CALCIPOTRIENE	EFO_0001359	type I diabetes mellitus	650	5458	193	64102	4.66718304187073	2.31814653905588e-55	FALSE	1.14908526339774e-53
CHEMBL272980	MOCETINOSTAT	EFO_0000676	psoriasis	2992	1693	243	64102	3.63663739857538	2.37165084150689e-55	FALSE	1.17482210076114e-53
CHEMBL14762	SELICICLIB	EFO_0000253	amyotrophic lateral sclerosis	1650	2437	213	64102	4.0139881591544	2.53283188071309e-55	FALSE	1.25382781659983e-53
CHEMBL1421	DASATINIB	EFO_0003767	inflammatory bowel disease	4246	1438	270	64102	3.41199388926003	2.57427833326207e-55	FALSE	1.27349549146475e-53
CHEMBL384467	DEXAMETHASONE	EFO_0003758	autism	734	5501	208	64102	4.33876124925178	2.63122047329859e-55	FALSE	1.30079756976097e-53
CHEMBL408513	BELINOSTAT	EFO_0005306	ventricular tachycardia	3180	1359	221	64102	3.92371852746752	2.9200640446305e-55	FALSE	1.44263217331429e-53
CHEMBL1423	PIMOZIDE	EFO_0000685	rheumatoid arthritis	1360	3417	230	64102	3.80376865870359	3.89761510174853e-55	FALSE	1.92430158765968e-53
CHEMBL1789941	RUXOLITINIB	EFO_0003761	unipolar depression	1263	4304	251	64102	3.59727339490429	3.98779237489342e-55	FALSE	1.96751418337079e-53
CHEMBL83	TAMOXIFEN	EFO_0003758	autism	858	5501	228	64102	3.97905040157929	4.10830427550003e-55	FALSE	2.02562603829555e-53
CHEMBL483254	PANOBINOSTAT	EFO_0001645	coronary heart disease	2060	2120	223	64102	3.84880700356566	4.45230104542674e-55	FALSE	2.19377821431535e-53
CHEMBL506871	VELIPARIB	EFO_0000692	schizophrenia	1046	5048	245	64102	3.70941380014949	4.60956038886716e-55	FALSE	2.26975732352945e-53
CHEMBL1289494	TIVOZANIB	EFO_0000712	stroke	2141	1475	186	64102	4.47758492435366	4.94561445028355e-55	FALSE	2.43361618224994e-53
CHEMBL502835	NINTEDANIB	EFO_0000712	stroke	2163	1475	187	64102	4.45600082850049	5.11687393877958e-55	FALSE	2.51622021621696e-53
CHEMBL1078983	AZD-2014	EFO_0000253	amyotrophic lateral sclerosis	2110	2437	245	64102	3.58343470441797	5.15794720999391e-55	FALSE	2.53473822991787e-53
CHEMBL1789941	RUXOLITINIB	EFO_0000249	Alzheimers disease	1263	3757	232	64102	3.78585883768788	5.72998585876826e-55	FALSE	2.81398809166048e-53
CHEMBL1229517	VEMURAFENIB	EFO_0000729	ulcerative colitis	2910	1773	245	64102	3.58938911319806	6.23610908632302e-55	FALSE	3.06051901290079e-53
CHEMBL1201129	DECITABINE	EFO_0001073	obesity	843	7209	262	64102	3.65523037886774	6.31993059735552e-55	FALSE	3.0996064109502e-53
CHEMBL289228	TIPIFARNIB	EFO_0000289	bipolar disorder	780	5835	222	64102	4.09063433535292	6.38379481197808e-55	FALSE	3.1288605946026e-53
CHEMBL2107832	PIMASERTIB	EFO_0004211	Hypertriglyceridemia	790	3627	174	64102	4.89613058767309	6.72975023264919e-55	FALSE	3.29624499018966e-53
CHEMBL402548	Danusertib	HP_0003124	hypercholesterolemia	956	4983	230	64102	3.89151782305561	7.0990141460388e-55	FALSE	3.47252699213454e-53
CHEMBL491473	CEDIRANIB	EFO_0000692	schizophrenia	1119	5048	255	64102	3.58304141547319	7.22644411546712e-55	FALSE	3.53253152561421e-53
CHEMBL45816	MIBEFRADIL	EFO_0004211	Hypertriglyceridemia	1058	3627	205	64102	4.18719133587232	7.2865904125082e-55	FALSE	3.55958816036979e-53
CHEMBL384467	DEXAMETHASONE	EFO_0001073	obesity	734	7209	240	64102	3.93117585999504	7.72054559504764e-55	FALSE	3.76909924921388e-53
CHEMBL608533	MIDOSTAURIN	EFO_0002614	insulin resistance	1525	2330	198	64102	4.23008726490432	7.88935921711718e-55	FALSE	3.84898028077699e-53
CHEMBL1789941	RUXOLITINIB	EFO_0000195	metabolic syndrome	1263	3177	211	64102	4.04876299612671	8.21039007132532e-55	FALSE	4.0029697453528e-53
CHEMBL1241855	RIGOSERTIB	EFO_0000253	amyotrophic lateral sclerosis	1885	2437	229	64102	3.75844309612464	8.42380929197269e-55	FALSE	4.10432546625629e-53
CHEMBL572878	TOZASERTIB	EFO_0005306	ventricular tachycardia	2870	1359	208	64102	4.07856417433919	8.6299844539275e-55	FALSE	4.20202097377749e-53
CHEMBL2103847	TOSEDOSTAT	EFO_0000764	HIV infection	2502	1866	231	64102	3.73075048320625	9.93308629418385e-55	FALSE	4.83334208826172e-53
CHEMBL1173655	AFATINIB	EFO_0000685	rheumatoid arthritis	1170	3417	210	64102	4.07382247509951	1.04870102785351e-54	FALSE	5.09953209514219e-53
CHEMBL1489	AZACITIDINE	EFO_0000270	asthma	2070	2121	223	64102	3.82527410366926	1.11154150040648e-54	FALSE	5.4015675859635e-53
CHEMBL1542	AZATHIOPRINE	EFO_0000537	hypertension	565	6014	186	64102	4.85939599107472	1.1137573310393e-54	FALSE	5.40879337367614e-53
CHEMBL1230609	FORETINIB	EFO_0001645	coronary heart disease	2302	2120	237	64102	3.65222711316384	1.18696826262269e-54	FALSE	5.76056114636474e-53
CHEMBL572878	TOZASERTIB	EFO_0000764	HIV infection	2870	1866	250	64102	3.51997373314928	1.23547765877268e-54	FALSE	5.99206664504751e-53
CHEMBL521851	PICTILISIB	EFO_0000612	myocardial infarction	3076	1504	229	64102	3.7697324247547	1.27336972229689e-54	FALSE	6.1718092908583e-53
CHEMBL1473	FLUTICASONE PROPIONATE	EFO_0003761	unipolar depression	822	4304	194	64102	4.44720782965753	1.32579332734851e-54	FALSE	6.42170325430133e-53
CHEMBL45816	MIBEFRADIL	HP_0003124	hypercholesterolemia	1058	4983	244	64102	3.68768865382558	1.50891584806251e-54	FALSE	7.29915909422936e-53
CHEMBL189963	PALBOCICLIB	EFO_0000270	asthma	2222	2121	232	64102	3.70261196253724	1.63621967960022e-54	FALSE	7.90981637294684e-53
CHEMBL1423	PIMOZIDE	EFO_0000378	coronary artery disease	1360	3553	234	64102	3.72024440779785	1.77538963721373e-54	FALSE	8.57142407478494e-53
CHEMBL567	PERPHENAZINE	EFO_0001073	obesity	888	7209	270	64102	3.54307478193913	1.79275540140823e-54	FALSE	8.64963683754863e-53
CHEMBL507361	PD-0325901	EFO_0000319	cardiovascular disease	4217	994	214	64102	4.05104918604192	1.8151323519541e-54	FALSE	8.75191008295997e-53
CHEMBL135	ESTRADIOL	EFO_0001073	obesity	603	7209	212	64102	4.37846240609415	1.96669953304912e-54	FALSE	9.47655447077339e-53
CHEMBL809	SERTRALINE	EFO_0000692	schizophrenia	1061	5048	246	64102	3.66053213717043	2.04212016909184e-54	FALSE	9.83358385123036e-53
CHEMBL1287853	FEDRATINIB	HP_0100543	cognitive impairment	3684	1411	244	64102	3.60106895724509	2.37862303340805e-54	FALSE	1.14465448893674e-52
CHEMBL38	TRETINOIN	EFO_0001359	type I diabetes mellitus	785	5458	214	64102	4.15053365003809	2.40820543242362e-54	FALSE	1.1581392359883e-52
CHEMBL1976040	AZD-1775	HP_0000545	Myopia	2693	1322	197	64102	4.22916077942022	2.60381275685983e-54	FALSE	1.25139848201285e-52
CHEMBL1079175	MK-2206	EFO_0005429	borderline personality disorder symptom	2937	1205	196	64102	4.26302699310969	2.65478335610446e-54	FALSE	1.27506924880085e-52
CHEMBL272980	MOCETINOSTAT	EFO_0005306	ventricular tachycardia	2992	1359	212	64102	3.98666357718637	2.80640761443047e-54	FALSE	1.34702119682285e-52
CHEMBL1421	DASATINIB	EFO_0004274	gout	4246	1054	222	64102	3.91405193460611	2.99386043134503e-54	FALSE	1.43606602009023e-52
CHEMBL14762	SELICICLIB	EFO_0000384	Crohn's disease	1650	3430	257	64102	3.44664862840968	3.29344157906179e-54	FALSE	1.57874568717235e-52
CHEMBL2105737	SONIDEGIB	EFO_0003885	multiple sclerosis	911	4889	220	64102	3.99084511615028	3.34990122415507e-54	FALSE	1.60477353349533e-52
CHEMBL2103875	TRAMETINIB	EFO_0003095	non-alcoholic fatty liver disease	2703	1226	189	64102	4.37584862009138	3.79832572079477e-54	FALSE	1.81841780717146e-52
CHEMBL1976040	AZD-1775	HP_0100543	cognitive impairment	2693	1411	204	64102	4.08786890199525	4.44724379783994e-54	FALSE	2.12770938761259e-52
CHEMBL180022	NERATINIB	EFO_0004274	gout	3106	1054	187	64102	4.44276444421179	4.59495804463034e-54	FALSE	2.19696431508888e-52
CHEMBL294199	CAPSAICIN	EFO_0000537	hypertension	549	6014	182	64102	4.9080084219239	4.87791198293716e-54	FALSE	2.33074989500227e-52
CHEMBL521686	OLAPARIB	EFO_0002614	insulin resistance	1599	2330	202	64102	4.10227962510934	5.10639313712308e-54	FALSE	2.43835201248531e-52
CHEMBL516	CYPROHEPTADINE	EFO_0000537	hypertension	656	6014	202	64102	4.41214344156836	5.35558788767196e-54	FALSE	2.55570031642893e-52
CHEMBL445813	AT-7519	EFO_0003882	osteoporosis	3979	916	197	64102	4.30348420792351	5.59408445067916e-54	FALSE	2.66779586544117e-52
CHEMBL1614701	SELUMETINIB	HP_0100543	cognitive impairment	3317	1411	229	64102	3.73893090567693	6.49850280840703e-54	FALSE	3.0971188240067e-52
CHEMBL254760	MGCD-265	EFO_0001073	obesity	565	7209	203	64102	4.5248800146243	6.57323451466892e-54	FALSE	3.13072443620672e-52
CHEMBL1789941	RUXOLITINIB	EFO_0000378	coronary artery disease	1263	3553	223	64102	3.83210083416531	6.71177395937873e-54	FALSE	3.19465802858049e-52
CHEMBL1771	CLOPIDOGREL	EFO_0001359	type I diabetes mellitus	571	5458	177	64102	4.95493355905771	7.35063874083591e-54	FALSE	3.49650094720339e-52
CHEMBL1200975	CLOCORTOLONE PIVALATE	EFO_0001359	type I diabetes mellitus	560	5458	175	64102	5.01233652203084	7.88434904356105e-54	FALSE	3.7479700241989e-52
CHEMBL1229517	VEMURAFENIB	EFO_0005306	ventricular tachycardia	2910	1359	208	64102	4.01555583883469	8.05007411678142e-54	FALSE	3.82430057513294e-52
CHEMBL521851	PICTILISIB	EFO_0000729	ulcerative colitis	3076	1773	251	64102	3.47352952329768	8.38091070691041e-54	FALSE	3.97892181066082e-52
CHEMBL2103875	TRAMETINIB	EFO_0000712	stroke	2703	1475	209	64102	3.98037718748309	1.09809999759435e-53	FALSE	5.20667797581399e-52
CHEMBL2028663	DABRAFENIB	EFO_0001645	coronary heart disease	2117	2120	224	64102	3.75028338061477	1.2724155018096e-53	FALSE	6.02934816805756e-52
CHEMBL1479	DANAZOL	EFO_0003885	multiple sclerosis	677	4889	184	64102	4.65779877313335	1.46205836817639e-53	FALSE	6.92355081113777e-52
CHEMBL483254	PANOBINOSTAT	EFO_0003095	non-alcoholic fatty liver disease	2060	1226	163	64102	4.9288417481712	1.47396016780824e-53	FALSE	6.97546009261547e-52
CHEMBL402548	Danusertib	EFO_0003761	unipolar depression	956	4304	210	64102	4.06047927926212	1.53615418921336e-53	FALSE	7.26515752776145e-52
CHEMBL603469	LESTAURTINIB	EFO_0000253	amyotrophic lateral sclerosis	1691	2437	213	64102	3.90006329004649	1.54893339281548e-53	FALSE	7.32093009005557e-52
CHEMBL2028663	DABRAFENIB	EFO_0003869	breast neoplasm	2117	2205	229	64102	3.68370774561743	1.55795685540938e-53	FALSE	7.3588916903662e-52
CHEMBL180022	NERATINIB	EFO_0000676	psoriasis	3106	1693	245	64102	3.52152690346991	1.62861852455226e-53	FALSE	7.68776320702291e-52
CHEMBL1976040	AZD-1775	EFO_0001365	age-related macular degeneration	2693	2123	258	64102	3.38270611425339	1.6904121607299e-53	FALSE	7.97438235136444e-52
CHEMBL160	CYCLOSPORINE	EFO_0001073	obesity	706	7209	232	64102	3.95731753797045	1.77786596328088e-53	FALSE	8.38161015281178e-52
CHEMBL1908394	GSK-461364	EFO_0000764	HIV infection	2431	1866	225	64102	3.73127106849584	1.87300256897201e-53	FALSE	8.82451781781385e-52
CHEMBL2105737	SONIDEGIB	EFO_0003761	unipolar depression	911	4304	204	64102	4.15862178175776	1.91822708743298e-53	FALSE	9.03185539485812e-52
CHEMBL1231160	PEVONEDISTAT	EFO_0002690	systemic lupus erythematosus	2455	1452	196	64102	4.17163031080842	1.97447777999266e-53	FALSE	9.29081316831678e-52
CHEMBL2103875	TRAMETINIB	EFO_0005306	ventricular tachycardia	2703	1359	199	64102	4.1269086878742	2.18234878341427e-53	FALSE	1.02624329197247e-51
CHEMBL1512	FLUNISOLIDE	EFO_0003761	unipolar depression	958	4304	210	64102	4.04949592046397	2.2062170196307e-53	FALSE	1.03681022129003e-51
CHEMBL2216870	IDELALISIB	EFO_0000673	prostate adenocarcinoma	1030	3249	188	64102	4.37719017059446	2.28328342178164e-53	FALSE	1.07234839438802e-51
CHEMBL193	NIFEDIPINE	EFO_0003758	autism	663	5501	193	64102	4.49706175813072	2.30911606557671e-53	FALSE	1.08379479852068e-51
CHEMBL1879463	DACTOLISIB	EFO_0001060	celiac disease	3807	1164	220	64102	3.85633890437668	2.34879015341649e-53	FALSE	1.10171917404722e-51
CHEMBL325041	BORTEZOMIB	EFO_0005306	ventricular tachycardia	2931	1359	208	64102	3.98322210799335	2.55545541499951e-53	FALSE	1.19789999412532e-51
CHEMBL603469	LESTAURTINIB	EFO_0003869	breast neoplasm	1691	2205	201	64102	4.06616175569784	2.67922045723455e-53	FALSE	1.25512344715334e-51
CHEMBL2216870	IDELALISIB	EFO_0003761	unipolar depression	1030	4304	219	64102	3.89957042936089	2.85326399356771e-53	FALSE	1.3358135939602e-51
CHEMBL160	CYCLOSPORINE	EFO_0003885	multiple sclerosis	706	4889	188	64102	4.53132968145763	3.08622455032429e-53	FALSE	1.44396779796226e-51
CHEMBL2103882	TIVANTINIB	EFO_0001645	coronary heart disease	1591	2120	190	64102	4.25672747326785	3.1480854916071e-53	FALSE	1.47198288534786e-51
CHEMBL1473	FLUTICASONE PROPIONATE	EFO_0003758	autism	822	5501	219	64102	3.98816242146027	3.54316384807756e-53	FALSE	1.65462852955693e-51
CHEMBL601719	CRIZOTINIB	EFO_0001365	age-related macular degeneration	2617	2123	253	64102	3.41170414075209	3.67106684353978e-53	FALSE	1.71220311203563e-51
CHEMBL2107832	PIMASERTIB	EFO_0000692	schizophrenia	790	5048	204	64102	4.20196959654166	4.07608236810293e-53	FALSE	1.89991012641381e-51
CHEMBL2105737	SONIDEGIB	EFO_0003758	autism	911	5501	233	64102	3.77822967046399	4.16394631720333e-53	FALSE	1.93964617996279e-51
CHEMBL255863	NILOTINIB	EFO_0000253	amyotrophic lateral sclerosis	2045	2437	237	64102	3.56614737719295	4.81810073625475e-53	FALSE	2.24295586658584e-51
CHEMBL180022	NERATINIB	EFO_0005429	borderline personality disorder symptom	3106	1205	200	64102	4.10814142672885	4.94157453200221e-53	FALSE	2.29899396957507e-51
CHEMBL2103847	TOSEDOSTAT	EFO_0001365	age-related macular degeneration	2502	2123	246	64102	3.46942415377982	5.55614309556309e-53	FALSE	2.58248286856783e-51
CHEMBL223360	LINIFANIB	EFO_0000612	myocardial infarction	3168	1504	230	64102	3.66557020552121	5.55788038690496e-53	FALSE	2.58248286856783e-51
CHEMBL1489	AZACITIDINE	EFO_0001645	coronary heart disease	2070	2120	220	64102	3.76366923093634	5.66669054483081e-53	FALSE	2.63139406682835e-51
CHEMBL1879463	DACTOLISIB	EFO_0000319	cardiovascular disease	3807	994	200	64102	4.155116720044	5.73196690583359e-53	FALSE	2.66004130236011e-51
CHEMBL45816	MIBEFRADIL	EFO_0003761	unipolar depression	1058	4304	222	64102	3.83515303597293	5.79552146485026e-53	FALSE	2.68785418937008e-51
CHEMBL300138	ENZASTAURIN	EFO_0002508	Parkinson's disease	1294	3371	218	64102	3.83345931604271	5.9063372778592e-53	FALSE	2.7375375246942e-51
CHEMBL1473	FLUTICASONE PROPIONATE	HP_0003124	hypercholesterolemia	822	4983	207	64102	4.12314744972239	7.07943340086766e-53	FALSE	3.279209460121e-51
CHEMBL1231160	PEVONEDISTAT	EFO_0005306	ventricular tachycardia	2455	1359	188	64102	4.28266325519644	7.23912736990064e-53	FALSE	3.35108825005288e-51
CHEMBL223360	LINIFANIB	EFO_0000319	cardiovascular disease	3168	994	181	64102	4.48084209700113	8.06669021043578e-53	FALSE	3.73185004404855e-51
CHEMBL1614701	SELUMETINIB	EFO_0005429	borderline personality disorder symptom	3317	1205	207	64102	3.98739886516195	8.36519003336893e-53	FALSE	3.86753225187627e-51
CHEMBL445813	AT-7519	EFO_0003819	dental caries	3979	1116	219	64102	3.84599320479632	8.6747134414408e-53	FALSE	4.00813892230457e-51
CHEMBL402548	Danusertib	EFO_0003885	multiple sclerosis	956	4889	224	64102	3.83569050292823	9.19871945037741e-53	FALSE	4.24761030998915e-51
CHEMBL1064	SIMVASTATIN	EFO_0000692	schizophrenia	1206	5048	263	64102	3.3869295554231	1.15261657880238e-52	FALSE	5.31902445460389e-51
CHEMBL445813	AT-7519	HP_0100543	cognitive impairment	3979	1411	252	64102	3.43976586188241	1.22156041070302e-52	FALSE	5.63367869957845e-51
CHEMBL272980	MOCETINOSTAT	EFO_0000612	myocardial infarction	2992	1504	222	64102	3.74042619013682	1.22525061430314e-52	FALSE	5.64718769157543e-51
CHEMBL1908391	Masitinib	EFO_0001359	type I diabetes mellitus	735	5458	203	64102	4.21974872721024	1.39221870527022e-52	FALSE	6.41276157818601e-51
CHEMBL38	TRETINOIN	EFO_0000289	bipolar disorder	785	5835	219	64102	3.9757504628306	1.39351303421985e-52	FALSE	6.41474160696549e-51
CHEMBL1263	SALMETEROL	EFO_0003885	multiple sclerosis	706	4889	187	64102	4.49752128916496	1.39844950040272e-52	FALSE	6.43347459252222e-51
CHEMBL445813	AT-7519	EFO_0000181	head and neck squamous cell carcinoma	3979	985	203	64102	4.07958656236078	1.76585498913217e-52	FALSE	8.11866601416066e-51
CHEMBL483254	PANOBINOSTAT	EFO_0000253	amyotrophic lateral sclerosis	2060	2437	237	64102	3.53598284966376	1.77110733120213e-52	FALSE	8.13777210599715e-51
CHEMBL83	TAMOXIFEN	EFO_0000537	hypertension	858	6014	235	64102	3.75052770447569	1.79182068216883e-52	FALSE	8.2278498589318e-51
CHEMBL1484	NICARDIPINE	EFO_0004211	Hypertriglyceridemia	897	3627	183	64102	4.44723225059076	1.84024491028905e-52	FALSE	8.44498290463813e-51
CHEMBL491473	CEDIRANIB	EFO_0000685	rheumatoid arthritis	1119	3417	201	64102	4.0690803146514	1.96636205732398e-52	FALSE	9.01816418193609e-51
CHEMBL601719	CRIZOTINIB	EFO_0000729	ulcerative colitis	2617	1773	226	64102	3.66168441971137	2.11561662721818e-52	FALSE	9.6966851033184e-51
CHEMBL1451	TRIAMCINOLONE	EFO_0000537	hypertension	396	6014	149	64102	5.94803575103721	2.43360505809207e-52	FALSE	1.11472631688717e-50
CHEMBL2103875	TRAMETINIB	EFO_0000612	myocardial infarction	2703	1504	209	64102	3.88944576153376	2.72673535441691e-52	FALSE	1.24822576788715e-50
CHEMBL1614701	SELUMETINIB	EFO_0002690	systemic lupus erythematosus	3317	1452	230	64102	3.63127778319422	2.89208386740888e-52	FALSE	1.32310162380441e-50
CHEMBL608533	MIDOSTAURIN	EFO_0000673	prostate adenocarcinoma	1525	3249	234	64102	3.58051374982427	2.96735746922691e-52	FALSE	1.35670216268628e-50
CHEMBL1484	NICARDIPINE	HP_0003124	hypercholesterolemia	897	4983	217	64102	3.91323016449295	3.04125502397323e-52	FALSE	1.38963256806609e-50
CHEMBL93	ZILEUTON	EFO_0000537	hypertension	611	6014	191	64102	4.50368960555123	3.15898168046004e-52	FALSE	1.44253683445254e-50
CHEMBL2103847	TOSEDOSTAT	HP_0000545	Myopia	2502	1322	186	64102	4.2743940470821	3.34066828193106e-52	FALSE	1.52456512829455e-50
CHEMBL272980	MOCETINOSTAT	EFO_0000729	ulcerative colitis	2992	1773	244	64102	3.45985254744198	3.36624250698738e-52	FALSE	1.53529210344805e-50
CHEMBL939	GEFITINIB	EFO_0000253	amyotrophic lateral sclerosis	2112	2437	240	64102	3.48901817638274	3.45001937541425e-52	FALSE	1.57253493705537e-50
CHEMBL21731	MAPROTILINE	EFO_0001073	obesity	812	7209	251	64102	3.62216038934889	3.57639183948286e-52	FALSE	1.62913539870366e-50
CHEMBL649	NADOLOL	EFO_0000537	hypertension	506	6014	171	64102	5.04512160960701	3.58607480946377e-52	FALSE	1.63254405666417e-50
CHEMBL178	DAUNORUBICIN	EFO_0000270	asthma	1724	2121	197	64102	4.05352116964707	3.64714700595991e-52	FALSE	1.65932889992186e-50
CHEMBL1173655	AFATINIB	EFO_0000249	Alzheimers disease	1170	3757	217	64102	3.8205361389398	3.68878357103905e-52	FALSE	1.67724377995682e-50
CHEMBL521851	PICTILISIB	EFO_0000676	psoriasis	3076	1693	241	64102	3.48769324472153	4.38093026888754e-52	FALSE	1.99073441887814e-50
CHEMBL1078983	AZD-2014	EFO_0000712	stroke	2110	1475	180	64102	4.37094406243171	4.46536502749596e-52	FALSE	2.02786053773156e-50
CHEMBL428690	ALVOCIDIB	EFO_0003819	dental caries	4118	1116	222	64102	3.76580536117503	4.69684807731058e-52	FALSE	2.13167958150967e-50
CHEMBL38	TRETINOIN	EFO_0003885	multiple sclerosis	785	4889	198	64102	4.21556202254955	5.32332000936633e-52	FALSE	2.41452910327034e-50
CHEMBL38	TRETINOIN	HP_0003124	hypercholesterolemia	785	4983	200	64102	4.18397502890903	5.6609032279048e-52	FALSE	2.56608017120755e-50
CHEMBL45816	MIBEFRADIL	EFO_0000692	schizophrenia	1058	5048	241	64102	3.57358649121245	7.4465969441394e-52	FALSE	3.37347207716645e-50
CHEMBL1230609	FORETINIB	EFO_0005306	ventricular tachycardia	2302	1359	180	64102	4.36148503459127	7.5307819485963e-52	FALSE	3.40952821534831e-50
CHEMBL2216870	IDELALISIB	EFO_0000692	schizophrenia	1030	5048	237	64102	3.61910427661128	7.95379822417557e-52	FALSE	3.59885120259115e-50
CHEMBL289228	TIPIFARNIB	HP_0003124	hypercholesterolemia	780	4983	199	64102	4.19112111207501	8.07685556150676e-52	FALSE	3.65230388142358e-50
CHEMBL38	TRETINOIN	EFO_0001073	obesity	785	7209	245	64102	3.67127121941183	8.57716515564308e-52	FALSE	3.87617868681178e-50
CHEMBL552212	LEXIBULIN	EFO_0000253	amyotrophic lateral sclerosis	1991	2437	231	64102	3.56381750805902	9.06623024074615e-52	FALSE	4.09470246509171e-50
CHEMBL178	DAUNORUBICIN	EFO_0002614	insulin resistance	1724	2330	207	64102	3.87282387589991	9.14189368388574e-52	FALSE	4.12636387355682e-50
CHEMBL1079175	MK-2206	HP_0100543	cognitive impairment	2937	1411	210	64102	3.8449970545804	1.14298835411417e-51	FALSE	5.15469348468007e-50
CHEMBL1230609	FORETINIB	EFO_0000764	HIV infection	2302	1866	215	64102	3.75328616630076	1.14402176556759e-51	FALSE	5.15469348468007e-50
CHEMBL27759	ENTINOSTAT	EFO_0005429	borderline personality disorder symptom	2971	1205	193	64102	4.12709961193417	1.14409812940746e-51	FALSE	5.15469348468007e-50
CHEMBL2105737	SONIDEGIB	HP_0003124	hypercholesterolemia	911	4983	218	64102	3.85662700270627	1.23270274732727e-51	FALSE	5.55052835955218e-50
CHEMBL2103875	TRAMETINIB	EFO_0001365	age-related macular degeneration	2703	2123	255	64102	3.31955095411441	1.28422559724285e-51	FALSE	5.77901518759284e-50
CHEMBL289228	TIPIFARNIB	EFO_0004211	Hypertriglyceridemia	780	3627	168	64102	4.75016114233052	1.30106597123726e-51	FALSE	5.85124850882792e-50
CHEMBL865	VALDECOXIB	EFO_0002614	insulin resistance	1757	2330	209	64102	3.83361507031034	1.30828997302066e-51	FALSE	5.88017307377334e-50
CHEMBL554	LAPATINIB	EFO_0000270	asthma	1865	2121	205	64102	3.88789070512076	1.34982163044738e-51	FALSE	6.0631667123092e-50
CHEMBL506871	VELIPARIB	EFO_0000685	rheumatoid arthritis	1046	3417	192	64102	4.17090603058297	1.39626749550068e-51	FALSE	6.26799936501078e-50
CHEMBL521686	OLAPARIB	EFO_0000253	amyotrophic lateral sclerosis	1599	2437	203	64102	3.92299878135345	1.48773777261428e-51	FALSE	6.67458170597597e-50
CHEMBL1421	DASATINIB	EFO_0003819	dental caries	4246	1116	225	64102	3.70277046011108	1.49484483634775e-51	FALSE	6.70241456683897e-50
CHEMBL456	ETHACRYNIC ACID	EFO_0001359	type I diabetes mellitus	539	5458	168	64102	4.98801541031928	1.50934284617199e-51	FALSE	6.76333248189569e-50
CHEMBL809	SERTRALINE	EFO_0000195	metabolic syndrome	1061	3177	186	64102	4.26762166377543	1.56307584644664e-51	FALSE	6.99988190619027e-50
CHEMBL428690	ALVOCIDIB	EFO_0002506	osteoarthritis	4118	808	183	64102	4.41670485149794	1.57297829309034e-51	FALSE	7.03997914588473e-50
CHEMBL1231160	PEVONEDISTAT	HP_0000545	Myopia	2455	1322	183	64102	4.27871446370448	1.66465945105716e-51	FALSE	7.44581401842656e-50
CHEMBL1078983	AZD-2014	EFO_0001365	age-related macular degeneration	2110	2123	220	64102	3.67569482051943	1.7803787543457e-51	FALSE	7.95861478712186e-50
CHEMBL160	CYCLOSPORINE	EFO_0000537	hypertension	706	6014	207	64102	4.1141529725837	1.79396477840105e-51	FALSE	8.01451874661349e-50
CHEMBL1614701	SELUMETINIB	EFO_0000729	ulcerative colitis	3317	1773	258	64102	3.29948876654502	1.83938751514034e-51	FALSE	8.21250003375385e-50
CHEMBL469	KETOROLAC	EFO_0001073	obesity	527	7209	191	64102	4.58107845959925	1.86904934880692e-51	FALSE	8.33991623140214e-50
CHEMBL180022	NERATINIB	EFO_0002690	systemic lupus erythematosus	3106	1452	220	64102	3.69742475462037	2.06217347380894e-51	FALSE	9.19612876346109e-50
CHEMBL1908360	EVEROLIMUS	EFO_0002614	insulin resistance	1590	2330	197	64102	4.00312934329938	2.3318954323162e-51	FALSE	1.03926907240254e-49
CHEMBL1421	DASATINIB	Orphanet_797	Sarcoidosis	4246	1078	220	64102	3.75707545265434	2.42090461267212e-51	FALSE	1.0782906769708e-49
CHEMBL1263	SALMETEROL	EFO_0003758	autism	706	5501	197	64102	4.2390581217944	2.72495922327729e-51	FALSE	1.21299099678039e-49
CHEMBL1421	DASATINIB	EFO_0000400	diabetes mellitus	4246	974	207	64102	3.94848205259866	2.77098963302018e-51	FALSE	1.2327415210927e-49
CHEMBL601719	CRIZOTINIB	EFO_0005306	ventricular tachycardia	2617	1359	192	64102	4.09216266095062	3.20690207523539e-51	FALSE	1.42581287293494e-49
CHEMBL288441	BOSUTINIB	EFO_0002614	insulin resistance	1594	2330	197	64102	3.99140957319589	3.44521415744287e-51	FALSE	1.53085099732364e-49
CHEMBL1263	SALMETEROL	EFO_0001359	type I diabetes mellitus	706	5458	196	64102	4.24592624140909	3.50328403647004e-51	FALSE	1.55572227364608e-49
CHEMBL1542	AZATHIOPRINE	EFO_0000289	bipolar disorder	565	5835	178	64102	4.70585751576278	3.80616017886649e-51	FALSE	1.68921122053103e-49
CHEMBL1908394	GSK-461364	EFO_0000612	myocardial infarction	2431	1504	195	64102	4.02138999969499	4.38076339097744e-51	FALSE	1.94306364272254e-49
CHEMBL21731	MAPROTILINE	EFO_0004211	Hypertriglyceridemia	812	3627	171	64102	4.61841124140247	4.45063875580767e-51	FALSE	1.9728772334212e-49
CHEMBL121	ROSIGLITAZONE	EFO_0000195	metabolic syndrome	1109	3177	190	64102	4.15323731674316	4.46002653227788e-51	FALSE	1.97585832135928e-49
CHEMBL325041	BORTEZOMIB	HP_0000545	Myopia	2931	1322	201	64102	3.94405635132477	4.52992713114529e-51	FALSE	2.00562794013506e-49
CHEMBL445813	AT-7519	EFO_0002506	osteoarthritis	3979	808	179	64102	4.45528567238618	4.5653476693188e-51	FALSE	2.02010509124509e-49
CHEMBL272980	MOCETINOSTAT	EFO_0001060	celiac disease	2992	1164	189	64102	4.1586149734633	4.59342581500378e-51	FALSE	2.03131801312489e-49
CHEMBL554	LAPATINIB	EFO_0001645	coronary heart disease	1865	2120	204	64102	3.86661393217683	4.8775289059393e-51	FALSE	2.15567023505197e-49
CHEMBL603469	LESTAURTINIB	EFO_0000270	asthma	1691	2121	193	64102	4.04163945470888	5.08840054738727e-51	FALSE	2.24752834892186e-49
CHEMBL1078983	AZD-2014	EFO_0001645	coronary heart disease	2110	2120	219	64102	3.66104416721846	5.1815505676281e-51	FALSE	2.28731088560882e-49
CHEMBL1908394	GSK-461364	EFO_0000270	asthma	2431	2121	238	64102	3.44577085364944	5.75476465323167e-51	FALSE	2.53883657011329e-49
CHEMBL809	SERTRALINE	Orphanet_84	Fanconi anemia	1061	3761	203	64102	3.95557805582304	5.90553236353608e-51	FALSE	2.60380290574091e-49
CHEMBL939	GEFITINIB	EFO_0003869	breast neoplasm	2112	2205	224	64102	3.59354477954017	6.75122211861659e-51	FALSE	2.97490758498779e-49
CHEMBL1473	FLUTICASONE PROPIONATE	EFO_0000692	schizophrenia	822	5048	205	64102	4.009288463334	9.15126827026276e-51	FALSE	4.03008820174984e-49
CHEMBL1423	PIMOZIDE	Orphanet_84	Fanconi anemia	1360	3761	235	64102	3.5079727044016	9.77256908671693e-51	FALSE	4.30114762206305e-49
CHEMBL502835	NINTEDANIB	EFO_0003095	non-alcoholic fatty liver disease	2163	1226	163	64102	4.66693198204314	9.87575892176765e-51	FALSE	4.34398749727189e-49
CHEMBL1771	CLOPIDOGREL	EFO_0003885	multiple sclerosis	571	4889	163	64102	4.97081621784583	1.10218232174014e-50	FALSE	4.8452274398535e-49
CHEMBL1201129	DECITABINE	EFO_0004211	Hypertriglyceridemia	843	3627	174	64102	4.50456275298056	1.15163008582897e-50	FALSE	5.05960393836226e-49
CHEMBL567	PERPHENAZINE	HP_0003124	hypercholesterolemia	888	4983	213	64102	3.86578087211739	1.19397826541211e-50	FALSE	5.2425536795802e-49
CHEMBL272980	MOCETINOSTAT	EFO_0002690	systemic lupus erythematosus	2992	1452	214	64102	3.72495230894619	1.23548596495e-50	FALSE	5.42159881898962e-49
CHEMBL1287853	FEDRATINIB	EFO_0003767	inflammatory bowel disease	3684	1438	240	64102	3.44463975357673	1.24148566593932e-50	FALSE	5.44470708280301e-49
CHEMBL408513	BELINOSTAT	EFO_0003882	osteoporosis	3180	916	170	64102	4.55561501468919	1.31622217445125e-50	FALSE	5.76906476403749e-49
CHEMBL567	PERPHENAZINE	EFO_0004211	Hypertriglyceridemia	888	3627	179	64102	4.37600236854823	1.52219177538807e-50	FALSE	6.667900867336e-49
CHEMBL502835	NINTEDANIB	EFO_0005306	ventricular tachycardia	2163	1359	172	64102	4.42126976180738	1.70564751272365e-50	FALSE	7.46711349154329e-49
CHEMBL1908391	Masitinib	EFO_0000289	bipolar disorder	735	5835	207	64102	4.02237181040773	1.79381543610447e-50	FALSE	7.84847137005495e-49
CHEMBL1908394	GSK-461364	EFO_0003095	non-alcoholic fatty liver disease	2431	1226	173	64102	4.41087569379759	1.825895204933e-50	FALSE	7.98412219693889e-49
CHEMBL1423	PIMOZIDE	EFO_0002614	insulin resistance	1360	2330	179	64102	4.26925593797979	2.03357926150485e-50	FALSE	8.88702880447391e-49
CHEMBL1078983	AZD-2014	EFO_0000270	asthma	2110	2121	218	64102	3.63848898384614	2.05219263759146e-50	FALSE	8.96309327089311e-49
CHEMBL521851	PICTILISIB	EFO_0002690	systemic lupus erythematosus	3076	1452	217	64102	3.67420548394931	2.13021732603808e-50	FALSE	9.29839862815621e-49
CHEMBL939	GEFITINIB	EFO_0001645	coronary heart disease	2112	2120	218	64102	3.63650034191625	2.21948992408626e-50	FALSE	9.6766891784266e-49
CHEMBL83	TAMOXIFEN	EFO_0001359	type I diabetes mellitus	858	5458	219	64102	3.79415460285016	2.27598154313118e-50	FALSE	9.91715856770694e-49
CHEMBL2103882	TIVANTINIB	Orphanet_84	Fanconi anemia	1591	3761	258	64102	3.26021057762621	2.45094235774353e-50	FALSE	1.06732498624623e-48
CHEMBL1289494	TIVOZANIB	EFO_0000764	HIV infection	2141	1866	204	64102	3.82104494303186	2.49175795831592e-50	FALSE	1.08446275247409e-48
CHEMBL255863	NILOTINIB	EFO_0001365	age-related macular degeneration	2045	2123	214	64102	3.68266688074329	2.61057314687258e-50	FALSE	1.1355075050626e-48
CHEMBL1200666	CALCIPOTRIENE	EFO_0000289	bipolar disorder	650	5835	192	64102	4.29465522386602	2.63905229094749e-50	FALSE	1.14722246777832e-48
CHEMBL217092	SARACATINIB	EFO_0003095	non-alcoholic fatty liver disease	2438	1226	173	64102	4.39644589874137	2.71373126892646e-50	FALSE	1.17899548484009e-48
CHEMBL601719	CRIZOTINIB	EFO_0005429	borderline personality disorder symptom	2617	1205	178	64102	4.29608743023573	2.74718084072149e-50	FALSE	1.19282945749408e-48
CHEMBL1171837	PONATINIB	EFO_0002614	insulin resistance	1865	2330	214	64102	3.68302200227009	2.79653992365339e-50	FALSE	1.2135511405538e-48
CHEMBL939	GEFITINIB	EFO_0001365	age-related macular degeneration	2112	2123	218	64102	3.63060282305174	2.80104008660238e-50	FALSE	1.21479356882718e-48
CHEMBL408513	BELINOSTAT	EFO_0005429	borderline personality disorder symptom	3180	1205	198	64102	3.95065716526001	3.00876946805704e-50	FALSE	1.30412230360498e-48
CHEMBL223360	LINIFANIB	EFO_0003819	dental caries	3168	1116	189	64102	4.1068175013638	3.21040370416699e-50	FALSE	1.39070640319738e-48
CHEMBL939	GEFITINIB	EFO_0000712	stroke	2112	1475	177	64102	4.2769096514807	4.18314459277053e-50	FALSE	1.81102826433219e-48
CHEMBL1171837	PONATINIB	EFO_0003869	breast neoplasm	1865	2205	207	64102	3.76425645653795	4.25088123820285e-50	FALSE	1.83928071300783e-48
CHEMBL2017974	BUPARLISIB	EFO_0000729	ulcerative colitis	2439	1773	213	64102	3.68684810588243	4.32038907571465e-50	FALSE	1.8682661501364e-48
CHEMBL27759	ENTINOSTAT	EFO_0000729	ulcerative colitis	2971	1773	239	64102	3.39860251509879	4.68744746190225e-50	FALSE	2.02581269021815e-48
CHEMBL507361	PD-0325901	EFO_0004319	smoking cessation	4217	770	178	64102	4.41381501062021	4.7762070294957e-50	FALSE	2.06297114449202e-48
CHEMBL217092	SARACATINIB	HP_0000545	Myopia	2438	1322	180	64102	4.22452565412499	4.78970108877218e-50	FALSE	2.06759609826841e-48
CHEMBL402548	Danusertib	EFO_0000685	rheumatoid arthritis	956	3417	180	64102	4.29284553969615	4.88846289374117e-50	FALSE	2.1090022618027e-48
CHEMBL27759	ENTINOSTAT	EFO_0005306	ventricular tachycardia	2971	1359	204	64102	3.82854914812638	5.11946970375614e-50	FALSE	2.20738087953065e-48
CHEMBL408513	BELINOSTAT	EFO_0003819	dental caries	3180	1116	189	64102	4.08953529073568	5.58653854486362e-50	FALSE	2.40597267975395e-48
CHEMBL552212	LEXIBULIN	EFO_0000270	asthma	1991	2121	210	64102	3.71456366679306	5.692063622853e-50	FALSE	2.44999757038171e-48
CHEMBL1201129	DECITABINE	EFO_0000378	coronary artery disease	843	3553	171	64102	4.5049959175441	6.31992986642254e-50	FALSE	2.71866896079933e-48
CHEMBL1231160	PEVONEDISTAT	EFO_0003095	non-alcoholic fatty liver disease	2455	1226	173	64102	4.36226844384068	7.05850059827185e-50	FALSE	3.03462362047951e-48
CHEMBL572878	TOZASERTIB	EFO_0003882	osteoporosis	2870	916	160	64102	4.72303949644522	7.91557752121583e-50	FALSE	3.40113161529716e-48
CHEMBL178	DAUNORUBICIN	EFO_0001645	coronary heart disease	1724	2120	193	64102	3.95452470620956	8.8682442005079e-50	FALSE	3.80687920705602e-48
CHEMBL507361	PD-0325901	EFO_0003819	dental caries	4217	1116	221	64102	3.64498998859135	8.87014911259331e-50	FALSE	3.80687920705602e-48
CHEMBL294199	CAPSAICIN	EFO_0000289	bipolar disorder	549	5835	173	64102	4.70421240426784	9.28567822446339e-50	FALSE	3.98291186500755e-48
CHEMBL1751	DIGOXIN	EFO_0000270	asthma	1932	2121	206	64102	3.75544461177811	9.44910356532611e-50	FALSE	4.05066857345479e-48
CHEMBL507361	PD-0325901	EFO_0000181	head and neck squamous cell carcinoma	4217	985	205	64102	3.87217768584855	9.53058642597457e-50	FALSE	4.08323998694828e-48
CHEMBL1200666	CALCIPOTRIENE	EFO_0003885	multiple sclerosis	650	4889	174	64102	4.55363771950966	1.07066547543768e-49	FALSE	4.58446229687554e-48
CHEMBL939	GEFITINIB	HP_0000545	Myopia	2112	1322	166	64102	4.48824709990697	1.19013787115173e-49	FALSE	5.09309000742871e-48
CHEMBL567	PERPHENAZINE	EFO_0000289	bipolar disorder	888	5835	231	64102	3.61434515137535	1.20377877960185e-49	FALSE	5.14849592739799e-48
CHEMBL1491	AMLODIPINE	EFO_0000195	metabolic syndrome	1133	3177	190	64102	4.04598422242367	1.20616753801009e-49	FALSE	5.1557409077211e-48
CHEMBL809	SERTRALINE	EFO_0002508	Parkinson's disease	1061	3371	189	64102	4.07728547886504	1.22365844033129e-49	FALSE	5.22749421789194e-48
CHEMBL1484	NICARDIPINE	EFO_0000249	Alzheimers disease	897	3757	182	64102	4.24564724156226	1.2589105138644e-49	FALSE	5.37499739248032e-48
CHEMBL1230609	FORETINIB	EFO_0002690	systemic lupus erythematosus	2302	1452	183	64102	4.119272533519	1.56693092509128e-49	FALSE	6.68626275424948e-48
CHEMBL223360	LINIFANIB	EFO_0003882	osteoporosis	3168	916	168	64102	4.50570051067637	1.63700482252293e-49	FALSE	6.98126108363875e-48
CHEMBL300138	ENZASTAURIN	EFO_0000195	metabolic syndrome	1294	3177	205	64102	3.79024792779173	1.67717094897701e-49	FALSE	7.14844745943934e-48
CHEMBL1200500	BECLOMETHASONE DIPROPIONATE	EFO_0003885	multiple sclerosis	576	4889	162	64102	4.86720340322903	1.95896300467387e-49	FALSE	8.34471008965699e-48
CHEMBL521851	PICTILISIB	EFO_0005429	borderline personality disorder symptom	3076	1205	193	64102	3.96996679748052	2.04069743017838e-49	FALSE	8.68789172727405e-48
CHEMBL2017974	BUPARLISIB	EFO_0005429	borderline personality disorder symptom	2439	1205	170	64102	4.38864356052082	2.1747134670705e-49	FALSE	9.25313146926412e-48
CHEMBL180022	NERATINIB	EFO_0003882	osteoporosis	3106	916	166	64102	4.53531911419173	2.42989079042119e-49	FALSE	1.032703585929e-47
CHEMBL98	VORINOSTAT	EFO_0000400	diabetes mellitus	4984	974	223	64102	3.6401078052497	2.4438333977417e-49	FALSE	1.03803467246378e-47
CHEMBL1614701	SELUMETINIB	EFO_0000319	cardiovascular disease	3317	994	180	64102	4.22728761909895	2.45129808351719e-49	FALSE	1.04060969271964e-47
CHEMBL601719	CRIZOTINIB	HP_0100543	cognitive impairment	2617	1411	193	64102	3.93962754124688	2.48479134576083e-49	FALSE	1.05422493889184e-47
CHEMBL576982	QUIZARTINIB	EFO_0000685	rheumatoid arthritis	976	3417	181	64102	4.21352552205885	2.51568458687616e-49	FALSE	1.06672214153797e-47
CHEMBL1079175	MK-2206	EFO_0003882	osteoporosis	2937	916	161	64102	4.64030757102808	3.32758098611216e-49	FALSE	1.41018359265821e-47
CHEMBL83	TAMOXIFEN	EFO_0003885	multiple sclerosis	858	4889	204	64102	3.89825699196289	3.48943289574504e-49	FALSE	1.47793018281256e-47
CHEMBL408513	BELINOSTAT	EFO_0002690	systemic lupus erythematosus	3180	1452	219	64102	3.58023277486246	3.5580636878044e-49	FALSE	1.5061387105164e-47
CHEMBL491473	CEDIRANIB	EFO_0000384	Crohn's disease	1119	3430	196	64102	3.92336101092414	3.64482796262447e-49	FALSE	1.54198665317303e-47
CHEMBL2103875	TRAMETINIB	HP_0000545	Myopia	2703	1322	189	64102	3.99883290004832	3.84671371098259e-49	FALSE	1.62646946395136e-47
CHEMBL469	KETOROLAC	EFO_0000289	bipolar disorder	527	5835	168	64102	4.78173653360833	4.0118285182288e-49	FALSE	1.69531739860574e-47
CHEMBL572878	TOZASERTIB	EFO_0000676	psoriasis	2870	1693	226	64102	3.48215344026615	4.26735108141203e-49	FALSE	1.80226970401924e-47
CHEMBL1200975	CLOCORTOLONE PIVALATE	EFO_0000289	bipolar disorder	560	5835	174	64102	4.60888057555374	4.43217942190382e-49	FALSE	1.87081839591794e-47
CHEMBL217092	SARACATINIB	EFO_0001365	age-related macular degeneration	2438	2123	235	64102	3.37724465349818	4.48750105264767e-49	FALSE	1.89309275504105e-47
CHEMBL503	LOVASTATIN	EFO_0000384	Crohn's disease	856	3430	168	64102	4.49007223141559	4.55396963696581e-49	FALSE	1.92004157335823e-47
CHEMBL1908394	GSK-461364	HP_0000545	Myopia	2431	1322	178	64102	4.17989199163707	5.69274459476518e-49	FALSE	2.39880813546025e-47
CHEMBL1908360	EVEROLIMUS	EFO_0002508	Parkinson's disease	1590	3371	239	64102	3.3538608575603	5.89987706604131e-49	FALSE	2.48467864747784e-47
CHEMBL445813	AT-7519	Orphanet_797	Sarcoidosis	3979	1078	208	64102	3.75617818541699	5.97207204521825e-49	FALSE	2.51365630241305e-47
CHEMBL98	VORINOSTAT	EFO_0004142	colorectal neoplasm	4984	640	173	64102	4.51603518149447	6.50435825880155e-49	FALSE	2.7361445838683e-47
CHEMBL572881	MOTESANIB	EFO_0001073	obesity	710	7209	225	64102	3.74681978095314	6.82790022343517e-49	FALSE	2.87061946787539e-47
CHEMBL189963	PALBOCICLIB	EFO_0000712	stroke	2222	1475	180	64102	4.12378255517809	7.07691957465732e-49	FALSE	2.97362863554613e-47
CHEMBL1289494	TIVOZANIB	EFO_0001645	coronary heart disease	2141	2120	217	64102	3.55909504676496	7.45589699178805e-49	FALSE	3.13109697948858e-47
CHEMBL1263	SALMETEROL	EFO_0004211	Hypertriglyceridemia	706	3627	155	64102	4.85486204909379	8.25146775506326e-49	FALSE	3.46323622604338e-47
CHEMBL601719	CRIZOTINIB	HP_0000545	Myopia	2617	1322	185	64102	4.03739380165138	9.49590130583232e-49	FALSE	3.98328635612938e-47
CHEMBL601719	CRIZOTINIB	EFO_0003882	osteoporosis	2617	916	151	64102	4.8596220397512	9.66266405727336e-49	FALSE	4.05094907553655e-47
CHEMBL180022	NERATINIB	EFO_0003767	inflammatory bowel disease	3106	1438	214	64102	3.61323930694125	9.96265687068784e-49	FALSE	4.17435885425969e-47
CHEMBL255863	NILOTINIB	EFO_0001645	coronary heart disease	2045	2120	211	64102	3.62439328691704	1.02671524571549e-48	FALSE	4.29951494403601e-47
CHEMBL469	KETOROLAC	EFO_0000537	hypertension	527	6014	170	64102	4.70400950051824	1.05142716628544e-48	FALSE	4.40051623656012e-47
CHEMBL98	VORINOSTAT	HP_0001657	prolonged QT interval	4984	707	183	64102	4.2622866485428	1.0691778664981e-48	FALSE	4.47228543311677e-47
CHEMBL503	LOVASTATIN	HP_0003124	hypercholesterolemia	856	4983	205	64102	3.85289672181191	1.1504393979224e-48	FALSE	4.8094848181877e-47
CHEMBL809	SERTRALINE	EFO_0000249	Alzheimers disease	1061	3757	199	64102	3.85976143268109	1.1883261212499e-48	FALSE	4.9650754407291e-47
CHEMBL1289494	TIVOZANIB	EFO_0003095	non-alcoholic fatty liver disease	2141	1226	159	64102	4.57802469809361	1.21202010882027e-48	FALSE	5.06122409538596e-47
CHEMBL1614701	SELUMETINIB	EFO_0004274	gout	3317	1054	185	64102	4.07257719965956	1.21817809968863e-48	FALSE	5.08407794642264e-47
CHEMBL1751	DIGOXIN	EFO_0001645	coronary heart disease	1932	2120	204	64102	3.71273748604743	1.23391410904912e-48	FALSE	5.14685758639628e-47
CHEMBL45816	MIBEFRADIL	EFO_0000195	metabolic syndrome	1058	3177	181	64102	4.13643327753003	1.36588240326482e-48	FALSE	5.69411818731831e-47
CHEMBL521851	PICTILISIB	EFO_0003882	osteoporosis	3076	916	164	64102	4.51382675572318	1.39961288733252e-48	FALSE	5.83145841125828e-47
CHEMBL1976040	AZD-1775	EFO_0005429	borderline personality disorder symptom	2693	1205	178	64102	4.16106176325118	1.50337122520982e-48	FALSE	6.26025037972471e-47
CHEMBL865	VALDECOXIB	EFO_0000253	amyotrophic lateral sclerosis	1757	2437	209	64102	3.64249752500835	1.61706257217372e-48	FALSE	6.72990062636853e-47
CHEMBL408513	BELINOSTAT	HP_0100543	cognitive impairment	3180	1411	214	64102	3.59976797932006	1.87668092623095e-48	FALSE	7.80600381900044e-47
CHEMBL576982	QUIZARTINIB	EFO_0003761	unipolar depression	976	4304	204	64102	3.80378612473069	1.89526448088661e-48	FALSE	7.87888519911434e-47
CHEMBL1200975	CLOCORTOLONE PIVALATE	EFO_0003885	multiple sclerosis	560	4889	158	64102	4.88558952940494	1.94080202472161e-48	FALSE	8.06367380988058e-47
CHEMBL189963	PALBOCICLIB	EFO_0001645	coronary heart disease	2222	2120	221	64102	3.48825541356894	2.03717175023411e-48	FALSE	8.45933574292792e-47
CHEMBL108	CARBAMAZEPINE	EFO_0000692	schizophrenia	728	5048	187	64102	4.16084276515411	2.08455208159881e-48	FALSE	8.65124089569572e-47
CHEMBL567	PERPHENAZINE	EFO_0000249	Alzheimers disease	888	3757	179	64102	4.20791483038206	2.1223461588666e-48	FALSE	8.79825121333498e-47
CHEMBL1370	BUDESONIDE	EFO_0001073	obesity	549	7209	191	64102	4.2980360143096	2.22742663403177e-48	FALSE	9.22870984803616e-47
CHEMBL1473	FLUTICASONE PROPIONATE	EFO_0004211	Hypertriglyceridemia	822	3627	168	64102	4.44239303872922	2.45002446480927e-48	FALSE	1.0145316150177e-46
CHEMBL191	LOSARTAN	EFO_0001359	type I diabetes mellitus	509	5458	158	64102	4.95075694471155	2.71548635969141e-48	FALSE	1.12382970061852e-46
CHEMBL572878	TOZASERTIB	EFO_0000612	myocardial infarction	2870	1504	209	64102	3.6348068483057	3.57622795716718e-48	FALSE	1.47923074449047e-46
CHEMBL160	CYCLOSPORINE	EFO_0001359	type I diabetes mellitus	706	5458	191	64102	4.09332709739748	4.49642636600371e-48	FALSE	1.85881514478721e-46
CHEMBL2103847	TOSEDOSTAT	EFO_0000612	myocardial infarction	2502	1504	193	64102	3.84393298588991	5.03785763274002e-48	FALSE	2.08148232537569e-46
CHEMBL1908391	Masitinib	EFO_0000195	metabolic syndrome	735	3177	147	64102	4.97790048662616	5.12407354093764e-48	FALSE	2.11592586035213e-46
CHEMBL572878	TOZASERTIB	HP_0100543	cognitive impairment	2870	1411	201	64102	3.73597481435531	5.2616466805426e-48	FALSE	2.17152665144418e-46
CHEMBL2017974	BUPARLISIB	EFO_0001365	age-related macular degeneration	2439	2123	233	64102	3.34024173003937	5.47144590051738e-48	FALSE	2.25685738214504e-46
CHEMBL254760	MGCD-265	EFO_0000537	hypertension	565	6014	176	64102	4.47162474929688	5.6063712745636e-48	FALSE	2.31122655793884e-46
CHEMBL1789941	RUXOLITINIB	EFO_0000673	prostate adenocarcinoma	1263	3249	202	64102	3.73548386215721	5.91868726458254e-48	FALSE	2.43862403369432e-46
CHEMBL865	VALDECOXIB	EFO_0001645	coronary heart disease	1757	2120	192	64102	3.84449298470211	5.9326339099593e-48	FALSE	2.44301386952569e-46
CHEMBL1614701	SELUMETINIB	EFO_0003819	dental caries	3317	1116	190	64102	3.92785332370128	6.49354548183561e-48	FALSE	2.67250994165065e-46
CHEMBL1908394	GSK-461364	EFO_0005306	ventricular tachycardia	2431	1359	179	64102	4.07455510178586	7.08659462271809e-48	FALSE	2.91497092005985e-46
CHEMBL1078983	AZD-2014	EFO_0000764	HIV infection	2110	1866	198	64102	3.7452764643965	7.9663508802068e-48	FALSE	3.27321742561321e-46
CHEMBL1171837	PONATINIB	EFO_0000712	stroke	1865	1475	162	64102	4.41334029279759	8.27433935390058e-48	FALSE	3.39788241148972e-46
CHEMBL572881	MOTESANIB	EFO_0004211	Hypertriglyceridemia	710	3627	154	64102	4.7782356015846	8.54034887290173e-48	FALSE	3.5038183862415e-46
CHEMBL1229517	VEMURAFENIB	EFO_0000612	myocardial infarction	2910	1504	210	64102	3.59996248402806	8.54175252437285e-48	FALSE	3.5038183862415e-46
CHEMBL1479	DANAZOL	EFO_0004211	Hypertriglyceridemia	677	3627	150	64102	4.90681357919768	8.647076887798e-48	FALSE	3.54506265446989e-46
CHEMBL38	TRETINOIN	EFO_0003758	autism	785	5501	204	64102	3.84546773384523	9.05207615392796e-48	FALSE	3.70700502760609e-46
CHEMBL300138	ENZASTAURIN	EFO_0000384	Crohn's disease	1294	3430	211	64102	3.60638785518415	9.73293959942763e-48	FALSE	3.98363366230296e-46
CHEMBL567	PERPHENAZINE	EFO_0001359	type I diabetes mellitus	888	5458	219	64102	3.62238148660858	9.970915467068e-48	FALSE	4.07878601010905e-46
CHEMBL1079175	MK-2206	EFO_0000612	myocardial infarction	2937	1504	211	64102	3.58385956133214	1.00383443988942e-47	FALSE	4.10410659019253e-46
CHEMBL27759	ENTINOSTAT	EFO_0002690	systemic lupus erythematosus	2971	1452	208	64102	3.62371948046716	1.0233098288919e-47	FALSE	4.18142653375128e-46
CHEMBL45816	MIBEFRADIL	EFO_0000378	coronary artery disease	1058	3553	191	64102	3.91090445907161	1.0514864590818e-47	FALSE	4.29419662609605e-46
CHEMBL521851	PICTILISIB	EFO_0004274	gout	3076	1054	176	64102	4.15747450698058	1.11457641454429e-47	FALSE	4.54934779104836e-46
CHEMBL384467	DEXAMETHASONE	EFO_0000289	bipolar disorder	734	5835	202	64102	3.89117962806183	1.40282405899562e-47	FALSE	5.72273553038869e-46
CHEMBL1513	IRBESARTAN	EFO_0003761	unipolar depression	956	4304	200	64102	3.80544607393534	1.40931386195252e-47	FALSE	5.74605138055972e-46
CHEMBL483254	PANOBINOSTAT	EFO_0001365	age-related macular degeneration	2060	2123	210	64102	3.56753085872738	1.4739108490042e-47	FALSE	6.00612600496193e-46
CHEMBL1908394	GSK-461364	EFO_0000712	stroke	2431	1475	187	64102	3.90675691880871	1.47605278283002e-47	FALSE	6.01155305981897e-46
CHEMBL1064	SIMVASTATIN	EFO_0000384	Crohn's disease	1206	3430	202	64102	3.71854579984537	1.49982420390182e-47	FALSE	6.1050167334358e-46
CHEMBL408513	BELINOSTAT	EFO_0004274	gout	3180	1054	179	64102	4.09320504251254	1.52965401528461e-47	FALSE	6.22302501119487e-46
CHEMBL325041	BORTEZOMIB	EFO_0002690	systemic lupus erythematosus	2931	1452	206	64102	3.6353568513886	1.67874940013505e-47	FALSE	6.82584105408337e-46
CHEMBL1614701	SELUMETINIB	EFO_0003767	inflammatory bowel disease	3317	1438	220	64102	3.47395286846117	1.82055460527243e-47	FALSE	7.39837100132754e-46
CHEMBL809	SERTRALINE	EFO_0002614	insulin resistance	1061	2330	152	64102	4.67245148150363	1.82534851968434e-47	FALSE	7.4137923865997e-46
CHEMBL300138	ENZASTAURIN	EFO_0000270	asthma	1294	2121	161	64102	4.41129220807785	2.12456349968189e-47	FALSE	8.62435637275135e-46
CHEMBL135	ESTRADIOL	EFO_0000537	hypertension	603	6014	182	64102	4.27473729692113	2.25367606051396e-47	FALSE	9.14346812850947e-46
CHEMBL83	TAMOXIFEN	EFO_0000195	metabolic syndrome	858	3177	159	64102	4.5390493166582	2.39302910342689e-47	FALSE	9.70353686446954e-46
CHEMBL1789941	RUXOLITINIB	EFO_0002614	insulin resistance	1263	2330	167	64102	4.27412871740326	2.52540922605501e-47	FALSE	1.022914801416e-45
CHEMBL507361	PD-0325901	Orphanet_797	Sarcoidosis	4217	1078	212	64102	3.60737024157045	2.80362136303137e-47	FALSE	1.13498485130247e-45
CHEMBL14762	SELICICLIB	EFO_0000270	asthma	1650	2121	184	64102	3.92112210802006	3.53354754262214e-47	FALSE	1.4296995387147e-45
CHEMBL1473	FLUTICASONE PROPIONATE	EFO_0000195	metabolic syndrome	822	3177	155	64102	4.63312419299688	3.61242840527574e-47	FALSE	1.46079681555828e-45
CHEMBL2103851	AMUVATINIB	EFO_0001359	type I diabetes mellitus	672	5458	184	64102	4.15783503982772	3.61434263643285e-47	FALSE	1.46079681555828e-45
CHEMBL572878	TOZASERTIB	EFO_0005429	borderline personality disorder symptom	2870	1205	182	64102	3.9849774736949	3.87253823985732e-47	FALSE	1.56429885731417e-45
CHEMBL1200666	CALCIPOTRIENE	EFO_0000537	hypertension	650	6014	190	64102	4.08727468899994	4.03108336216982e-47	FALSE	1.62745669689778e-45
CHEMBL445813	AT-7519	EFO_0004274	gout	3979	1054	202	64102	3.72017508421677	4.33523011991688e-47	FALSE	1.74929717807739e-45
CHEMBL1131	ACITRETIN	EFO_0000289	bipolar disorder	437	5835	148	64102	5.22063851063407	4.86220813490861e-47	FALSE	1.96087040571138e-45
CHEMBL189963	PALBOCICLIB	EFO_0005306	ventricular tachycardia	2222	1359	169	64102	4.19807294025269	5.27027287915088e-47	FALSE	2.1242835361075e-45
CHEMBL1491	AMLODIPINE	EFO_0000249	Alzheimers disease	1133	3757	204	64102	3.67186142278735	5.3626148390214e-47	FALSE	2.16033026128981e-45
CHEMBL428690	ALVOCIDIB	EFO_0004319	smoking cessation	4118	770	171	64102	4.29506388916733	5.64221018427664e-47	FALSE	2.27173199524823e-45
CHEMBL1496	ROSUVASTATIN	EFO_0003758	autism	568	5501	167	64102	4.54394319505111	5.76404230938725e-47	FALSE	2.31952689570543e-45
CHEMBL1908394	GSK-461364	EFO_0000729	ulcerative colitis	2431	1773	207	64102	3.57202254848669	6.02917798993555e-47	FALSE	2.42359237672355e-45
CHEMBL1512	FLUNISOLIDE	EFO_0000692	schizophrenia	958	5048	218	64102	3.55659879429398	6.63199381964721e-47	FALSE	2.6644672516888e-45
CHEMBL1473	FLUTICASONE PROPIONATE	EFO_0002614	insulin resistance	822	2330	132	64102	5.31561571768773	6.84540582495294e-47	FALSE	2.74871936818524e-45
CHEMBL300138	ENZASTAURIN	Orphanet_84	Fanconi anemia	1294	3761	221	64102	3.44820916239105	6.94137605347288e-47	FALSE	2.78574802621934e-45
CHEMBL1241855	RIGOSERTIB	EFO_0001645	coronary heart disease	1885	2120	198	64102	3.68214941304183	7.47762036114113e-47	FALSE	2.99933415620798e-45
CHEMBL2107832	PIMASERTIB	EFO_0000249	Alzheimers disease	790	3757	165	64102	4.38906125419941	8.2266647163726e-47	FALSE	3.29799921814386e-45
CHEMBL1423	PIMOZIDE	EFO_0000673	prostate adenocarcinoma	1360	3249	209	64102	3.56588248168314	8.41104006739251e-47	FALSE	3.37009302484266e-45
CHEMBL1512	FLUNISOLIDE	EFO_0000685	rheumatoid arthritis	958	3417	175	64102	4.12950565374141	8.97154210427235e-47	FALSE	3.5927322279953e-45
CHEMBL1908394	GSK-461364	HP_0100543	cognitive impairment	2431	1411	181	64102	3.95291324956217	9.19801361010249e-47	FALSE	3.68143797161626e-45
CHEMBL1230609	FORETINIB	EFO_0000712	stroke	2302	1475	180	64102	3.96315306827261	1.00177019778698e-46	FALSE	4.00735081006916e-45
CHEMBL2105737	SONIDEGIB	EFO_0000692	schizophrenia	911	5048	211	64102	3.63630887985949	1.0428295760979e-46	FALSE	4.16935176154875e-45
CHEMBL1079175	MK-2206	EFO_0000729	ulcerative colitis	2937	1773	231	64102	3.30063567668663	1.08205863102279e-46	FALSE	4.32386433575909e-45
CHEMBL2107832	PIMASERTIB	EFO_0001359	type I diabetes mellitus	790	5458	202	64102	3.7942096122114	1.15979810985158e-46	FALSE	4.63201392580929e-45
CHEMBL44657	ETOPOSIDE	EFO_0000537	hypertension	818	6014	218	64102	3.60361635440374	1.20678061592666e-46	FALSE	4.81706054894234e-45
CHEMBL503	LOVASTATIN	EFO_0000692	schizophrenia	856	5048	203	64102	3.74689043240827	1.21600341245586e-46	FALSE	4.85126522695092e-45
CHEMBL1289494	TIVOZANIB	EFO_0005306	ventricular tachycardia	2141	1359	165	64102	4.24953784460521	1.28729589158198e-46	FALSE	5.13292808354868e-45
CHEMBL1879463	DACTOLISIB	EFO_0003767	inflammatory bowel disease	3807	1438	237	64102	3.26637288184865	1.33248952989402e-46	FALSE	5.3102784944031e-45
CHEMBL1201129	DECITABINE	EFO_0003761	unipolar depression	843	4304	184	64102	4.00798423329154	1.35951798707616e-46	FALSE	5.4150849291995e-45
CHEMBL1201129	DECITABINE	EFO_0000692	schizophrenia	843	5048	201	64102	3.77265581913089	1.42451140712915e-46	FALSE	5.67091571706109e-45
CHEMBL93	ZILEUTON	EFO_0001073	obesity	611	7209	201	64102	3.95067920159015	1.44531534116287e-46	FALSE	5.75065012820327e-45
CHEMBL1200975	CLOCORTOLONE PIVALATE	EFO_0003758	autism	560	5501	165	64102	4.55647639719033	1.48840408347669e-46	FALSE	5.91891881106044e-45
CHEMBL1230609	FORETINIB	EFO_0003095	non-alcoholic fatty liver disease	2302	1226	162	64102	4.32102305317884	1.4906530634909e-46	FALSE	5.92468722958449e-45
CHEMBL217092	SARACATINIB	EFO_0000764	HIV infection	2438	1866	213	64102	3.47529570940254	1.49936567267586e-46	FALSE	5.95612578912807e-45
CHEMBL1370	BUDESONIDE	HP_0003124	hypercholesterolemia	549	4983	155	64102	4.78490061902169	1.50182339880287e-46	FALSE	5.96269691322455e-45
CHEMBL21731	MAPROTILINE	HP_0003124	hypercholesterolemia	812	4983	195	64102	3.8610688088725	1.57292665207606e-46	FALSE	6.23832294052935e-45
CHEMBL1879463	DACTOLISIB	EFO_0004274	gout	3807	1054	196	64102	3.75962009949413	1.68418322123264e-46	FALSE	6.67244078652258e-45
CHEMBL223360	LINIFANIB	HP_0100543	cognitive impairment	3168	1411	210	64102	3.53082673480997	1.70419416722564e-46	FALSE	6.74811783238948e-45
CHEMBL1976040	AZD-1775	EFO_0000676	psoriasis	2693	1693	213	64102	3.47766148102065	1.70726715598683e-46	FALSE	6.75668049653346e-45
CHEMBL1287853	FEDRATINIB	EFO_0003819	dental caries	3684	1116	199	64102	3.70476467448243	1.8066446503272e-46	FALSE	7.14616557982569e-45
CHEMBL2017974	BUPARLISIB	EFO_0003095	non-alcoholic fatty liver disease	2439	1226	167	64102	4.20625936256821	1.86346892067554e-46	FALSE	7.36700646024125e-45
CHEMBL809	SERTRALINE	EFO_0000673	prostate adenocarcinoma	1061	3249	180	64102	3.9925573724993	1.91508571925618e-46	FALSE	7.56703598495233e-45
CHEMBL502835	NINTEDANIB	EFO_0005429	borderline personality disorder symptom	2163	1205	155	64102	4.4758516782781	2.02300448669299e-46	FALSE	7.98919893214761e-45
CHEMBL21731	MAPROTILINE	EFO_0001359	type I diabetes mellitus	812	5458	205	64102	3.73102914097614	2.03777823431373e-46	FALSE	8.04326244027929e-45
CHEMBL272980	MOCETINOSTAT	EFO_0005429	borderline personality disorder symptom	2992	1205	185	64102	3.8827803740699	2.17752641049929e-46	FALSE	8.59028959548641e-45
CHEMBL576982	QUIZARTINIB	EFO_0000378	coronary artery disease	976	3553	180	64102	4.00598147199147	2.41589905271431e-46	FALSE	9.52559985157627e-45
CHEMBL27759	ENTINOSTAT	HP_0100543	cognitive impairment	2971	1411	202	64102	3.6153573016159	2.63065176277428e-46	FALSE	1.03613330178697e-44
CHEMBL38	TRETINOIN	EFO_0003761	unipolar depression	785	4304	176	64102	4.14381033427749	2.63411228156e-46	FALSE	1.03694589842525e-44
CHEMBL1289494	TIVOZANIB	HP_0000545	Myopia	2141	1322	162	64102	4.29044977876768	2.67834762355785e-46	FALSE	1.05380055888711e-44
CHEMBL428690	ALVOCIDIB	EFO_0000400	diabetes mellitus	4118	974	195	64102	3.77732357747973	3.05696927048927e-46	FALSE	1.20213251042213e-44
CHEMBL217092	SARACATINIB	EFO_0000729	ulcerative colitis	2438	1773	206	64102	3.53937000971233	3.34775692709868e-46	FALSE	1.31578550198812e-44
CHEMBL2105737	SONIDEGIB	EFO_0000249	Alzheimers disease	911	3757	178	64102	4.04476368594623	3.75553458463807e-46	FALSE	1.47527498069385e-44
CHEMBL2103847	TOSEDOSTAT	EFO_0005306	ventricular tachycardia	2502	1359	179	64102	3.94547189489897	3.81753737930395e-46	FALSE	1.49883789011243e-44
CHEMBL1513	IRBESARTAN	EFO_0000195	metabolic syndrome	956	3177	167	64102	4.22856929602629	4.00503865371287e-46	FALSE	1.57162291538214e-44
CHEMBL402548	Danusertib	EFO_0000673	prostate adenocarcinoma	956	3249	169	64102	4.1877265346804	4.22271954547827e-46	FALSE	1.65616756803496e-44
CHEMBL502835	NINTEDANIB	EFO_0000729	ulcerative colitis	2163	1773	192	64102	3.71908476045053	4.27767223679273e-46	FALSE	1.67683395843214e-44
CHEMBL44657	ETOPOSIDE	EFO_0001073	obesity	818	7209	241	64102	3.37583964084429	4.35755900862637e-46	FALSE	1.70724744580317e-44
CHEMBL572878	TOZASERTIB	EFO_0002690	systemic lupus erythematosus	2870	1452	201	64102	3.61048662762079	4.41509138887874e-46	FALSE	1.72887523225196e-44
CHEMBL1231160	PEVONEDISTAT	EFO_0000764	HIV infection	2455	1866	213	64102	3.44796708611509	4.4566516368762e-46	FALSE	1.7442290860464e-44
CHEMBL2103882	TIVANTINIB	EFO_0000253	amyotrophic lateral sclerosis	1591	2437	193	64102	3.70795147740714	4.68258948463322e-46	FALSE	1.8316897875973e-44
CHEMBL1421	DASATINIB	EFO_0004142	colorectal neoplasm	4246	640	155	64102	4.63784453670904	4.73954615752045e-46	FALSE	1.85299274298633e-44
CHEMBL1200500	BECLOMETHASONE DIPROPIONATE	EFO_0000537	hypertension	576	6014	175	64102	4.31162472629289	4.90264096506296e-46	FALSE	1.91574761881252e-44
CHEMBL108	CARBAMAZEPINE	EFO_0003761	unipolar depression	728	4304	168	64102	4.29668529259313	5.14114449175363e-46	FALSE	2.00788751058199e-44
CHEMBL1287853	FEDRATINIB	EFO_0000319	cardiovascular disease	3684	994	185	64102	3.89594681731377	5.58672335451972e-46	FALSE	2.1807617386751e-44
CHEMBL2216870	IDELALISIB	EFO_0000249	Alzheimers disease	1030	3757	191	64102	3.79829120566746	5.67489390373042e-46	FALSE	2.21401420676296e-44
CHEMBL135	ESTRADIOL	EFO_0003885	multiple sclerosis	603	4889	161	64102	4.52768580545385	6.56217990556845e-46	FALSE	2.55883636307255e-44
CHEMBL445813	AT-7519	EFO_0000319	cardiovascular disease	3979	994	193	64102	3.77490065600211	6.84430890020581e-46	FALSE	2.66744717405343e-44
CHEMBL483254	PANOBINOSTAT	HP_0000545	Myopia	2060	1322	158	64102	4.34403464041634	7.08348517255059e-46	FALSE	2.75921268886675e-44
CHEMBL325041	BORTEZOMIB	EFO_0005429	borderline personality disorder symptom	2931	1205	182	64102	3.8927043673854	7.26731669370528e-46	FALSE	2.82933491739979e-44
CHEMBL21731	MAPROTILINE	EFO_0000195	metabolic syndrome	812	3177	152	64102	4.58824795218611	7.29118738497976e-46	FALSE	2.83713980022246e-44
CHEMBL1421	DASATINIB	EFO_0000181	head and neck squamous cell carcinoma	4246	985	199	64102	3.6951297406783	8.08862893638862e-46	FALSE	3.14578988587378e-44
CHEMBL1751	DIGOXIN	EFO_0000253	amyotrophic lateral sclerosis	1932	2437	216	64102	3.39745724771514	8.57347332610365e-46	FALSE	3.33260653831075e-44
CHEMBL503	LOVASTATIN	EFO_0000378	coronary artery disease	856	3553	166	64102	4.2516858140148	9.02289572595561e-46	FALSE	3.5054658499714e-44
CHEMBL1287853	FEDRATINIB	EFO_0003882	osteoporosis	3684	916	176	64102	4.04612818233359	9.46837650434816e-46	FALSE	3.67661370227711e-44
CHEMBL38	TRETINOIN	EFO_0000195	metabolic syndrome	785	3177	149	64102	4.66424559083544	9.69743662973878e-46	FALSE	3.76358935726865e-44
CHEMBL1512	FLUNISOLIDE	EFO_0000378	coronary artery disease	958	3553	177	64102	4.01230625187218	1.07070338985389e-45	FALSE	4.15324333738147e-44
CHEMBL1287853	FEDRATINIB	EFO_0004274	gout	3684	1054	191	64102	3.77297166523451	1.10532773320142e-45	FALSE	4.28531057691803e-44
CHEMBL1879463	DACTOLISIB	EFO_0004142	colorectal neoplasm	3807	640	146	64102	4.82715650390612	1.11318075006309e-45	FALSE	4.31350274456563e-44
CHEMBL193	NIFEDIPINE	EFO_0001073	obesity	663	7209	210	64102	3.73815824842646	1.13282918819758e-45	FALSE	4.38734811639882e-44
CHEMBL2103875	TRAMETINIB	EFO_0004274	gout	2703	1054	161	64102	4.29120413577857	1.15490991303783e-45	FALSE	4.47053156478729e-44
CHEMBL1976040	AZD-1775	EFO_0002690	systemic lupus erythematosus	2693	1452	193	64102	3.68779431511557	1.22553762964024e-45	FALSE	4.74145045919988e-44
CHEMBL189963	PALBOCICLIB	EFO_0001365	age-related macular degeneration	2222	2123	216	64102	3.38619666377074	1.2527525720569e-45	FALSE	4.84421597756551e-44
CHEMBL1976040	AZD-1775	EFO_0000612	myocardial infarction	2693	1504	197	64102	3.62901081192331	1.28624935775144e-45	FALSE	4.97115279124715e-44
CHEMBL865	VALDECOXIB	EFO_0000270	asthma	1757	2121	188	64102	3.74489687878586	1.33987529682932e-45	FALSE	5.17571298288493e-44
CHEMBL272980	MOCETINOSTAT	EFO_0004274	gout	2992	1054	170	64102	4.10406500096298	1.37864210847195e-45	FALSE	5.32269186572117e-44
CHEMBL2107832	PIMASERTIB	EFO_0000673	prostate adenocarcinoma	790	3249	151	64102	4.5927630367298	1.48614457314798e-45	FALSE	5.73475600886354e-44
CHEMBL1789941	RUXOLITINIB	EFO_0002508	Parkinson's disease	1263	3371	202	64102	3.58466600862907	1.52129948709123e-45	FALSE	5.86736114550959e-44
CHEMBL428690	ALVOCIDIB	Orphanet_797	Sarcoidosis	4118	1078	206	64102	3.56953432570587	1.5830941583106e-45	FALSE	6.10251958532145e-44
CHEMBL1064	SIMVASTATIN	EFO_0000685	rheumatoid arthritis	1206	3417	198	64102	3.64130004107117	1.58736414441007e-45	FALSE	6.11580250965469e-44
CHEMBL601719	CRIZOTINIB	EFO_0003095	non-alcoholic fatty liver disease	2617	1226	172	64102	4.03329350775013	1.68092455992272e-45	FALSE	6.47291162268114e-44
CHEMBL506871	VELIPARIB	EFO_0000378	coronary artery disease	1046	3553	186	64102	3.83437590161726	1.68328263335924e-45	FALSE	6.47863007305095e-44
CHEMBL254760	MGCD-265	HP_0003124	hypercholesterolemia	565	4983	156	64102	4.63895864111302	1.69715903520964e-45	FALSE	6.52865143637798e-44
CHEMBL1231160	PEVONEDISTAT	EFO_0000676	psoriasis	2455	1693	200	64102	3.57313453975314	1.71024392979467e-45	FALSE	6.5755777621976e-44
CHEMBL1289494	TIVOZANIB	EFO_0001365	age-related macular degeneration	2141	2123	211	64102	3.43342333287455	1.74706790032986e-45	FALSE	6.71368065996775e-44
CHEMBL649	NADOLOL	EFO_0003758	autism	506	5501	154	64102	4.76585175453802	1.77722761829881e-45	FALSE	6.82604427618341e-44
CHEMBL1976040	AZD-1775	EFO_0000729	ulcerative colitis	2693	1773	217	64102	3.3710828971141	1.94777260799595e-45	FALSE	7.47720984875012e-44
CHEMBL135	ESTRADIOL	EFO_0000289	bipolar disorder	603	5835	176	64102	4.21295790106127	2.03744704637739e-45	FALSE	7.81741251687872e-44
CHEMBL1201129	DECITABINE	EFO_0000249	Alzheimers disease	843	3757	169	64102	4.16996432116819	2.06336284039888e-45	FALSE	7.91275656701803e-44
CHEMBL576982	QUIZARTINIB	EFO_0000249	Alzheimers disease	976	3757	184	64102	3.87248680161444	2.27823119619228e-45	FALSE	8.72773081638866e-44
CHEMBL325041	BORTEZOMIB	EFO_0003767	inflammatory bowel disease	2931	1438	201	64102	3.5670720346206	2.30487732477275e-45	FALSE	8.82525396722198e-44
CHEMBL254760	MGCD-265	EFO_0003758	autism	565	5501	164	64102	4.45984663227099	2.45453288836282e-45	FALSE	9.39343027235498e-44
CHEMBL121	ROSIGLITAZONE	EFO_0000685	rheumatoid arthritis	1109	3417	188	64102	3.77750997178869	2.66902346366624e-45	FALSE	1.02090147485234e-43
CHEMBL272980	MOCETINOSTAT	HP_0100543	cognitive impairment	2992	1411	201	64102	3.56495883995164	2.71731193328109e-45	FALSE	1.03883633183474e-43
CHEMBL217092	SARACATINIB	EFO_0005306	ventricular tachycardia	2438	1359	175	64102	3.95010642213657	2.77142195691696e-45	FALSE	1.05897716948003e-43
CHEMBL507361	PD-0325901	EFO_0000474	epilepsy	4217	631	152	64102	4.63723497562935	3.11785502552728e-45	FALSE	1.19073819953295e-43
CHEMBL2028663	DABRAFENIB	EFO_0000270	asthma	2117	2121	209	64102	3.44146742476407	3.14280722925918e-45	FALSE	1.19965025950194e-43
CHEMBL1513	IRBESARTAN	EFO_0004211	Hypertriglyceridemia	956	3627	178	64102	3.96015716823645	3.25879076685531e-45	FALSE	1.24328313035732e-43
CHEMBL1078983	AZD-2014	HP_0000545	Myopia	2110	1322	159	64102	4.26237705630293	3.33500090036521e-45	FALSE	1.27170473695581e-43
CHEMBL809	SERTRALINE	EFO_0000685	rheumatoid arthritis	1061	3417	183	64102	3.85471334881292	3.35656119965562e-45	FALSE	1.2786311506398e-43
CHEMBL193	NIFEDIPINE	EFO_0000289	bipolar disorder	663	5835	186	64102	3.98942658570866	3.35661138932193e-45	FALSE	1.2786311506398e-43
CHEMBL803	CYTARABINE	EFO_0001073	obesity	588	7209	194	64102	3.96509034748044	3.36102534692443e-45	FALSE	1.27965564837623e-43
CHEMBL1484	NICARDIPINE	EFO_0000685	rheumatoid arthritis	897	3417	166	64102	4.18776075760234	3.53359591869674e-45	FALSE	1.34466915459944e-43
CHEMBL1614701	SELUMETINIB	EFO_0001060	celiac disease	3317	1164	190	64102	3.73071030589994	3.61333880711241e-45	FALSE	1.37430961651346e-43
CHEMBL160	CYCLOSPORINE	EFO_0003758	autism	706	5501	187	64102	3.93756988195499	3.68020020053083e-45	FALSE	1.3990228272561e-43
CHEMBL1263	SALMETEROL	EFO_0000378	coronary artery disease	706	3553	148	64102	4.6727898361272	3.83555773093024e-45	FALSE	1.457335183941e-43
CHEMBL506871	VELIPARIB	EFO_0002508	Parkinson's disease	1046	3371	180	64102	3.89957307109671	3.91778572339872e-45	FALSE	1.48781622110953e-43
CHEMBL1370	BUDESONIDE	EFO_0000289	bipolar disorder	549	5835	166	64102	4.42548302034543	3.93369980982373e-45	FALSE	1.49309562346788e-43
CHEMBL254760	MGCD-265	EFO_0001359	type I diabetes mellitus	565	5458	163	64102	4.45991091086051	4.00611277370348e-45	FALSE	1.5198036726619e-43
CHEMBL603469	LESTAURTINIB	EFO_0001645	coronary heart disease	1691	2120	183	64102	3.78875290316102	4.18515658461392e-45	FALSE	1.58691642494265e-43
CHEMBL502835	NINTEDANIB	HP_0000545	Myopia	2163	1322	161	64102	4.20976354648352	4.21039961145777e-45	FALSE	1.5956726413086e-43
CHEMBL325041	BORTEZOMIB	EFO_0000181	head and neck squamous cell carcinoma	2931	985	161	64102	4.25655360256048	4.31768157959768e-45	FALSE	1.63549546510488e-43
CHEMBL160	CYCLOSPORINE	HP_0003124	hypercholesterolemia	706	4983	177	64102	4.07920055036999	4.51653592295463e-45	FALSE	1.70994667430025e-43
CHEMBL121	ROSIGLITAZONE	EFO_0000384	Crohn's disease	1109	3430	188	64102	3.76157521426093	4.56546875173528e-45	FALSE	1.72759106946719e-43
CHEMBL1489	AZACITIDINE	EFO_0001365	age-related macular degeneration	2070	2123	206	64102	3.46547513731439	4.85189167898348e-45	FALSE	1.83503884831279e-43
CHEMBL83	TAMOXIFEN	HP_0003124	hypercholesterolemia	858	4983	199	64102	3.68983944080609	4.96128772537217e-45	FALSE	1.87545774661866e-43
CHEMBL108	CARBAMAZEPINE	EFO_0004211	Hypertriglyceridemia	728	3627	152	64102	4.54848398080028	5.06763671800468e-45	FALSE	1.91468422942738e-43
CHEMBL2103847	TOSEDOSTAT	EFO_0003095	non-alcoholic fatty liver disease	2502	1226	167	64102	4.08855706117805	5.18409612901649e-45	FALSE	1.95768882062936e-43
CHEMBL83	TAMOXIFEN	EFO_0000378	coronary artery disease	858	3553	165	64102	4.20634848761072	5.27697752349982e-45	FALSE	1.99175034146137e-43
CHEMBL1231160	PEVONEDISTAT	HP_0100543	cognitive impairment	2455	1411	179	64102	3.85673789610347	5.49176928551146e-45	FALSE	2.07176786899531e-43
CHEMBL2017974	BUPARLISIB	EFO_0000612	myocardial infarction	2439	1504	185	64102	3.75514426799886	5.80536221028767e-45	FALSE	2.18895783950405e-43
CHEMBL408513	BELINOSTAT	EFO_0003767	inflammatory bowel disease	3180	1438	210	64102	3.43699651703087	6.15714068244993e-45	FALSE	2.32041962590755e-43
CHEMBL98	VORINOSTAT	EFO_0000516	glaucoma	4984	674	172	64102	4.17372720320667	6.19149609516247e-45	FALSE	2.33218257736818e-43
CHEMBL428690	ALVOCIDIB	EFO_0000181	head and neck squamous cell carcinoma	4118	985	194	64102	3.69938861214215	6.49188417457032e-45	FALSE	2.44409064015216e-43
CHEMBL1908391	Masitinib	HP_0003124	hypercholesterolemia	735	4983	181	64102	3.98486017709387	6.84093074306025e-45	FALSE	2.57419505978086e-43
CHEMBL1513	IRBESARTAN	EFO_0000692	schizophrenia	956	5048	214	64102	3.4789296396187	7.24816368950005e-45	FALSE	2.72605162990041e-43
CHEMBL1064	SIMVASTATIN	Orphanet_84	Fanconi anemia	1206	3761	208	64102	3.48089612494769	7.79400828483353e-45	FALSE	2.92986010524859e-43
CHEMBL608533	MIDOSTAURIN	EFO_0001645	coronary heart disease	1525	2120	172	64102	3.95651516559716	8.57017256855477e-45	FALSE	3.21999825544105e-43
CHEMBL45816	MIBEFRADIL	EFO_0000249	Alzheimers disease	1058	3757	192	64102	3.69867389677144	8.68341893887801e-45	FALSE	3.26089626700123e-43
CHEMBL2103851	AMUVATINIB	EFO_0004211	Hypertriglyceridemia	672	3627	145	64102	4.73612207934685	8.89203775416837e-45	FALSE	3.33755013428459e-43
CHEMBL1489	AZACITIDINE	EFO_0005306	ventricular tachycardia	2070	1359	159	64102	4.2176323883096	1.02424983802321e-44	FALSE	3.84249035543541e-43
CHEMBL1173655	AFATINIB	EFO_0002614	insulin resistance	1170	2330	156	64102	4.29943652021498	1.07794785875543e-44	FALSE	4.04189595042683e-43
CHEMBL1287853	FEDRATINIB	EFO_0000474	epilepsy	3684	631	141	64102	4.86697821211562	1.14255372740485e-44	FALSE	4.28197976475137e-43
CHEMBL189963	PALBOCICLIB	EFO_0003095	non-alcoholic fatty liver disease	2222	1226	156	64102	4.29107809982571	1.14352261848709e-44	FALSE	4.28344754693762e-43
CHEMBL572881	MOTESANIB	EFO_0001359	type I diabetes mellitus	710	5458	186	64102	3.91263507265588	1.15051154293196e-44	FALSE	4.30745252488729e-43
CHEMBL2103875	TRAMETINIB	EFO_0005429	borderline personality disorder symptom	2703	1205	172	64102	3.97123462837883	1.15253229595052e-44	FALSE	4.31284210897674e-43
CHEMBL38	TRETINOIN	EFO_0004211	Hypertriglyceridemia	785	3627	158	64102	4.34730061596009	1.24473283910752e-44	FALSE	4.65551412933336e-43
CHEMBL1200500	BECLOMETHASONE DIPROPIONATE	EFO_0000289	bipolar disorder	576	5835	170	64102	4.27678881434759	1.26869864701835e-44	FALSE	4.74275985400486e-43
CHEMBL601719	CRIZOTINIB	EFO_0000612	myocardial infarction	2617	1504	192	64102	3.63085428396595	1.29890635119573e-44	FALSE	4.85323996930911e-43
CHEMBL502835	NINTEDANIB	EFO_0000764	HIV infection	2163	1866	195	64102	3.57332960447307	1.55952202221386e-44	FALSE	5.82114344358045e-43
CHEMBL254760	MGCD-265	EFO_0003885	multiple sclerosis	565	4889	153	64102	4.61054092896424	1.6381604651375e-44	FALSE	6.11159865839758e-43
CHEMBL1542	AZATHIOPRINE	EFO_0001359	type I diabetes mellitus	565	5458	162	64102	4.42066082359628	1.78644171660636e-44	FALSE	6.66145264225001e-43
CHEMBL516	CYPROHEPTADINE	EFO_0001359	type I diabetes mellitus	656	5458	177	64102	4.07011699333399	1.84911693036157e-44	FALSE	6.89169873518233e-43
CHEMBL507361	PD-0325901	EFO_0002506	osteoarthritis	4217	808	174	64102	4.02222428152375	1.85506654114795e-44	FALSE	6.91040224326726e-43
CHEMBL1489	AZACITIDINE	EFO_0000712	stroke	2070	1475	166	64102	4.04427116838904	1.89439352000692e-44	FALSE	7.05336031872121e-43
CHEMBL1879463	DACTOLISIB	Orphanet_797	Sarcoidosis	3807	1078	195	64102	3.6322430790519	1.97770982353202e-44	FALSE	7.35987750527551e-43
CHEMBL325041	BORTEZOMIB	EFO_0000676	psoriasis	2931	1693	220	64102	3.28877402145994	1.98039618777763e-44	FALSE	7.36618040671876e-43
CHEMBL2017974	BUPARLISIB	EFO_0000712	stroke	2439	1475	182	64102	3.7651350613576	1.98854101237405e-44	FALSE	7.39276983082246e-43
CHEMBL121	ROSIGLITAZONE	EFO_0002614	insulin resistance	1109	2330	151	64102	4.39826065810697	2.12327374518749e-44	FALSE	7.88971097955122e-43
CHEMBL521686	OLAPARIB	EFO_0001645	coronary heart disease	1599	2120	176	64102	3.85292079119384	2.21755647129415e-44	FALSE	8.23592482244156e-43
CHEMBL1479	DANAZOL	EFO_0000289	bipolar disorder	677	5835	187	64102	3.90343299625523	2.22311016586376e-44	FALSE	8.25242070324762e-43
CHEMBL865	VALDECOXIB	EFO_0003869	breast neoplasm	1757	2205	190	64102	3.62980811951947	2.49274875327176e-44	FALSE	9.24872106182655e-43
CHEMBL413	SIROLIMUS	EFO_0000289	bipolar disorder	506	5835	157	64102	4.58864004392705	2.54351878212782e-44	FALSE	9.43237437420265e-43
CHEMBL1230609	FORETINIB	EFO_0001365	age-related macular degeneration	2302	2123	218	64102	3.28880747296471	2.95606486363925e-44	FALSE	1.09567828774401e-42
CHEMBL939	GEFITINIB	EFO_0005306	ventricular tachycardia	2112	1359	160	64102	4.15568629955815	3.02103360348401e-44	FALSE	1.11920019244399e-42
CHEMBL178	DAUNORUBICIN	EFO_0000253	amyotrophic lateral sclerosis	1724	2437	199	64102	3.50644026748285	3.1071706180964e-44	FALSE	1.15053690476968e-42
CHEMBL14762	SELICICLIB	EFO_0003869	breast neoplasm	1650	2205	183	64102	3.72830273658403	3.15413405965991e-44	FALSE	1.16734422891304e-42
CHEMBL1479	DANAZOL	EFO_0001359	type I diabetes mellitus	677	5458	180	64102	3.99030650672516	3.16231943185251e-44	FALSE	1.16979019661324e-42
CHEMBL567	PERPHENAZINE	EFO_0000378	coronary artery disease	888	3553	167	64102	4.0925776411329	3.29188855549025e-44	FALSE	1.21711305560615e-42
CHEMBL384467	DEXAMETHASONE	EFO_0001359	type I diabetes mellitus	734	5458	189	64102	3.82346495530643	3.3627458046377e-44	FALSE	1.24269199418895e-42
CHEMBL1771	CLOPIDOGREL	EFO_0000692	schizophrenia	571	5048	156	64102	4.50573522317279	3.5982990125387e-44	FALSE	1.32907803994741e-42
CHEMBL710	FINASTERIDE	EFO_0003758	autism	466	5501	145	64102	4.91500115998177	3.65050813641656e-44	FALSE	1.3476913246905e-42
CHEMBL1171837	PONATINIB	EFO_0001645	coronary heart disease	1865	2120	192	64102	3.58945490463357	3.68248281404546e-44	FALSE	1.35881967785302e-42
CHEMBL939	GEFITINIB	EFO_0003095	non-alcoholic fatty liver disease	2112	1226	151	64102	4.36275218950139	3.69441240330098e-44	FALSE	1.36254409735064e-42
CHEMBL939	GEFITINIB	EFO_0000729	ulcerative colitis	2112	1773	186	64102	3.67590147892494	3.71033138265614e-44	FALSE	1.36773542101341e-42
CHEMBL27759	ENTINOSTAT	EFO_0004274	gout	2971	1054	167	64102	4.0450437173337	3.77780379064804e-44	FALSE	1.39191623776086e-42
CHEMBL1064	SIMVASTATIN	EFO_0000378	coronary artery disease	1206	3553	200	64102	3.53031198392746	3.78774658021564e-44	FALSE	1.39488702225758e-42
CHEMBL1230609	FORETINIB	HP_0000545	Myopia	2302	1322	165	64102	4.04682095148365	3.96599106542046e-44	FALSE	1.45980340778534e-42
CHEMBL1908360	EVEROLIMUS	EFO_0000270	asthma	1590	2121	175	64102	3.84917827724214	4.2456660535901e-44	FALSE	1.56197148986938e-42
CHEMBL1229517	VEMURAFENIB	EFO_0002690	systemic lupus erythematosus	2910	1452	199	64102	3.51128360288872	4.37507369512894e-44	FALSE	1.60878267367216e-42
CHEMBL2107832	PIMASERTIB	EFO_0003761	unipolar depression	790	4304	173	64102	4.01702242528169	4.53437922166762e-44	FALSE	1.66653595910771e-42
CHEMBL1200374	EXEMESTANE	EFO_0001073	obesity	450	7209	163	64102	4.56275660224554	4.5671110143245e-44	FALSE	1.67773501395025e-42
CHEMBL1131	ACITRETIN	EFO_0000537	hypertension	437	6014	146	64102	4.9414939223082	4.68079095031461e-44	FALSE	1.71864469306331e-42
CHEMBL1479	DANAZOL	HP_0003124	hypercholesterolemia	677	4983	171	64102	4.11649938450674	4.77476150213381e-44	FALSE	1.75228079755608e-42
CHEMBL300138	ENZASTAURIN	EFO_0003869	breast neoplasm	1294	2205	159	64102	4.16016355795048	5.36923420643731e-44	FALSE	1.96947120261335e-42
CHEMBL1879463	DACTOLISIB	EFO_0000181	head and neck squamous cell carcinoma	3807	985	184	64102	3.77167555595069	5.4742631798972e-44	FALSE	2.00700444300529e-42
CHEMBL1421	DASATINIB	EFO_0004319	smoking cessation	4246	770	169	64102	4.0869985254917	5.64475885930928e-44	FALSE	2.06849052422245e-42
CHEMBL189963	PALBOCICLIB	EFO_0000764	HIV infection	2222	1866	197	64102	3.50940454283587	6.22842070180355e-44	FALSE	2.28124362377755e-42
CHEMBL1171837	PONATINIB	EFO_0000253	amyotrophic lateral sclerosis	1865	2437	208	64102	3.37927833357119	6.25197264272571e-44	FALSE	2.28874015763918e-42
CHEMBL1489	AZACITIDINE	EFO_0003095	non-alcoholic fatty liver disease	2070	1226	149	64102	4.38963586130806	6.50256179558079e-44	FALSE	2.37930275168182e-42
CHEMBL2017974	BUPARLISIB	HP_0000545	Myopia	2439	1322	170	64102	3.93543748669845	6.74527222349495e-44	FALSE	2.4668946542358e-42
CHEMBL554	LAPATINIB	EFO_0005306	ventricular tachycardia	1865	1359	149	64102	4.37906701143126	6.80436517935215e-44	FALSE	2.48728038489569e-42
CHEMBL1200666	CALCIPOTRIENE	EFO_0004211	Hypertriglyceridemia	650	3627	141	64102	4.76460855816677	7.44714171969103e-44	FALSE	2.72090177897426e-42
CHEMBL1200975	CLOCORTOLONE PIVALATE	EFO_0001073	obesity	560	7209	186	64102	4.00267182789995	7.45221719419585e-44	FALSE	2.72141622487846e-42
CHEMBL325041	BORTEZOMIB	EFO_0001060	celiac disease	2931	1164	175	64102	3.86404924202388	7.56704319881474e-44	FALSE	2.76198937810156e-42
CHEMBL217092	SARACATINIB	EFO_0000612	myocardial infarction	2438	1504	183	64102	3.70729321727836	7.70285642674448e-44	FALSE	2.81017925834107e-42
CHEMBL445813	AT-7519	EFO_0000400	diabetes mellitus	3979	974	187	64102	3.7177047469439	9.1173360562293e-44	FALSE	3.32294657196707e-42
CHEMBL710	FINASTERIDE	EFO_0001073	obesity	466	7209	166	64102	4.44630571942867	9.40784338968585e-44	FALSE	3.42714294909985e-42
CHEMBL428690	ALVOCIDIB	EFO_0000319	cardiovascular disease	4118	994	193	64102	3.63295864515221	9.53723498998839e-44	FALSE	3.47257371163929e-42
CHEMBL1161	MOMETASONE FUROATE	EFO_0000537	hypertension	492	6014	156	64102	4.57716284257568	9.59678659523853e-44	FALSE	3.49254315497634e-42
CHEMBL217092	SARACATINIB	EFO_0005429	borderline personality disorder symptom	2438	1205	161	64102	4.10547999820434	9.63418577102922e-44	FALSE	3.50443507421188e-42
CHEMBL1229517	VEMURAFENIB	HP_0100543	cognitive impairment	2910	1411	195	64102	3.54234552160538	9.66042022928e-44	FALSE	3.51225616420246e-42
CHEMBL44657	ETOPOSIDE	EFO_0003885	multiple sclerosis	818	4889	189	64102	3.74501988658691	9.90402075717824e-44	FALSE	3.59905906114795e-42
CHEMBL1287853	FEDRATINIB	Orphanet_797	Sarcoidosis	3684	1078	190	64102	3.64522019203002	1.19074731431494e-43	FALSE	4.32498308657563e-42
CHEMBL456	ETHACRYNIC ACID	EFO_0004211	Hypertriglyceridemia	539	3627	127	64102	5.28913578762664	1.19389470896473e-43	FALSE	4.33429338937023e-42
CHEMBL1287853	FEDRATINIB	EFO_0000181	head and neck squamous cell carcinoma	3684	985	180	64102	3.80355254993634	1.28507691800257e-43	FALSE	4.66303827385723e-42
CHEMBL503	LOVASTATIN	EFO_0000195	metabolic syndrome	856	3177	153	64102	4.33403357941532	1.38306416032315e-43	FALSE	5.01614252281424e-42
CHEMBL1421	DASATINIB	EFO_0000474	epilepsy	4246	631	150	64102	4.52036344783807	1.50127085392512e-43	FALSE	5.44219852054291e-42
CHEMBL1079175	MK-2206	EFO_0002690	systemic lupus erythematosus	2937	1452	199	64102	3.47509187455296	1.68505432251052e-43	FALSE	6.10246246958971e-42
CHEMBL1421	DASATINIB	EFO_0002506	osteoarthritis	4246	808	173	64102	3.96146642688124	1.84321286224321e-43	FALSE	6.67198099720766e-42
CHEMBL2107832	PIMASERTIB	EFO_0000378	coronary artery disease	790	3553	155	64102	4.30376693512651	1.8696471507311e-43	FALSE	6.7643669829352e-42
[truncated: 6,075 more rows]
